# Supplementary material for: Synthetic Biology Facilitates Semisynthetic Development of Type V Glycopeptide Antibiotics Targeting Vancomycin-Resistant Enterococcus
Source: PubMed Central journal article supplement — J Med Chem. 2023 Jun 14;66(13):9006–22. doi: 10.1021/acs.jmedchem.3c00633 (PMC10350919; doi:10.1021/acs.jmedchem.3c00633), 2023-06-14

## Supporting Information

### **Synthetic Biology Facilitates Semi-Synthetic Development of Type V Glycopeptide Antibiotics Targeting Vancomycin Resistant *Enterococcus***

Kalinka Koteva<sup>1, #</sup>, Min Xu<sup>1,2,3 #</sup>, Wenliang Wang<sup>1</sup>, Aline A. Fiebig-Comyn<sup>1</sup>, Michael A. Cook<sup>1</sup>,  
Brian K. Coombes<sup>1</sup>, and Gerard D. Wright<sup>1,\*</sup>

<sup>1</sup>David Braley Centre for Antibiotic Discovery, M.G. DeGroot Institute for Infectious Disease Research, Department of Biochemistry and Biomedical Sciences, McMaster University, Hamilton, Ontario, L8S 4K1, Canada

<sup>2</sup>Tianjin Institute of Industrial Biotechnology, Chinese Academy of Sciences, West 7th Avenue No. 32, 300308 Tianjin, China

<sup>3</sup>Haihe Laboratory of Synthetic Biology, West 15th Avenue No. 21, 300308 Tianjin, China

<sup>#</sup>These authors contributed equally to this work.

<sup>\*</sup>Corresponding author: [wrightge@mcmater.ca](mailto:wrightge@mcmater.ca)

## Contents

|                                       |         |
|---------------------------------------|---------|
| Chemicals.....                        | S3      |
| Flash Purification.....               | S3      |
| HPLC analysis.....                    | S3      |
| HRMS analysis.....                    | S3      |
| NMR analysis.....                     | S4      |
| VISA MIC.....                         | S4      |
| Toxicity studies.....                 | S4      |
| Analytical Data for analogs 1-32..... | S7-S103 |

## **Chemicals**

All chemicals were Sigma Aldrich products.

## **Flash purification**

Compounds were dried onto C18 resin before being packed onto a 5 g solid loading cartridge (Teledyne Isco, Inc) and loaded onto a C18 column (5 g, Teledyne Isco) for flash purification. Products were eluted with a gradient of acetonitrile in water.

## **HPLC analysis**

Rimomycin analogs were analyzed on a Symmetry Shield RP8 Column (100 Å, 3.5 µm, 4.6 mm × 150 mm, Waters WAT094269). HPLC program used for rimomycins detection is at t = 0-1 min, 5% solvent B; t = 20-22 min, 100% solvent B; t = 23-27 min, 5% solvent B using H<sub>2</sub>O (0.1% trifluoroacetic acid, solvent A) and acetonitrile (ACN, 0.1% TFA, solvent B) as mobile phases; 1 mL/min flow rate; 40 °C

## **HRMS analysis**

High-resolution electrospray ionization mass spectra were acquired using an Agilent 1290 UPLC separation module and a qTOF 6550 mass detector in negative or positive ion mode. For LC separation an Agilent Eclipse XDB-C18 column (2.1 x 150 mm; 3.5 µm) or an XDB C8 column (2.1 x 150 mm; 3.5 µm) and the following method were used: from 0 to 1 min 75% A (0.1 v/v formic acid in water), from 1 to 7 min a linear gradient to 100% B (0.1 v/v formic acid in acetonitrile) at a flow rate of 0.4 mL/min.

## **NMR analysis**

All NMR spectra were recorded on an AVIII 700 MHz NMR spectrometer, equipped with a cryoprobe. The compounds used in this study were dissolved in the corresponding deuterated solvent (Cambridge Isotope Laboratories Inc) to a concentration of approximately 1.0 to 5.0 mg/ml. Chemical shifts are reported in ppm relative to TMS using the residual solvent signal at 2.50 ppm and 39.52 ppm for dms0-d6. Chemical shifts values are expressed in ppm ( $\delta$ ), coupling constants (J, Hz) and peak patterns are reported as broad singlet (bs), singlet (s), doublet (d), triplet (t), quartet (q), pentet (p), and multiplet (m)

### Supplementary MIC values

Supplementary Table 1. Additional MIC values against *S. aureus*, including VISA strains in  $\mu\text{g/ml}$ .

|                               | Vancomycin | Corbomycin | Rimomycin | 17 |       |
|-------------------------------|------------|------------|-----------|----|-------|
| <i>S. aureus</i> ATCC 29213   | 1          | 4          | 4         | 16 |       |
| <i>S. aureus</i> ATCC 33591   | 2          | 4          | 4         | 16 |       |
| <i>S. aureus</i> Mu3          | 2          | 4          | 4         | 8  | hVISA |
| <i>S. aureus</i> Mu50         | 4          | 4          | 4         | 16 | VISA  |
| <i>E. faecium</i> ATCC 51299  |            |            | 8         | 2  |       |
| <i>E. faecalis</i> ATCC 70022 |            |            | 8         | 1  |       |

### Toxicity studies

The equation used for the 4PL curves was:

$$y = d + (a - d) / (1 + (x/c)^b),$$

where y = the sample response in relative luminescence units

x = drug concentration

a = the maximum response for infinite standard concentration

b = -Hill slope

c = inflection point

d = the response at a standard concentration of 0.

Supplementary Table 2. Toxicity studies of selected analogs, IC<sub>50</sub> values.

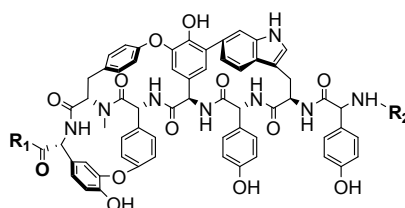

| Compound# [Substitution]                    | Hill slope     | IC <sub>50</sub> (µg/ml) | R <sup>2</sup> | 95% Confidence interval |           |
|---------------------------------------------|----------------|--------------------------|----------------|-------------------------|-----------|
| Rimomycin A                                 | Unstable       | Unstable                 | -0.6694        | Very wide               |           |
| R <sub>1</sub>                              | R <sub>2</sub> |                          |                |                         |           |
| 6. NH <sub>2</sub> -Pr-NH-                  | H              | -22.30                   | 556.7          | -0.9887                 | Very wide |
| 9. <sup>+</sup> NMe <sub>3</sub> -Pr-NH-    | H              | -2140                    | 579.6          | -1.089                  | Very wide |
| 13. OH                                      | -Hexyl         | Unstable                 | Unstable       | -0.4260                 | Very wide |
| 16. OH                                      | Ahx            | Unstable                 | Unstable       | -5.617                  | Very wide |
| 17. [ <sup>+</sup> NMe <sub>3</sub> -Pr-NH- | Ahx*           | -4.052                   | 729.0          | -0.1540                 | Very wide |
| 19. OH                                      | -3-OH-Phenyl   | Unstable                 | Unstable       | -2.070                  | Very wide |
| MG132 control                               | -2.206         | 0.7938                   | -0.9474        | 0.5397 to 0.7412        |           |

\* Ahx- 6-Amino-hexanoic acid

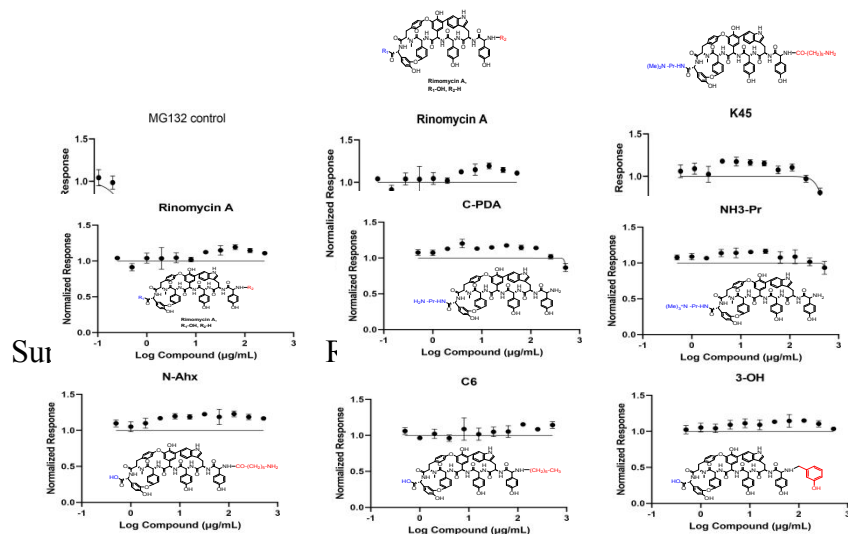

|    | Concentration ( $\mu\text{g/mL}$ ) |      |       |      |       |       |       |       |       |       |       |
|----|------------------------------------|------|-------|------|-------|-------|-------|-------|-------|-------|-------|
|    | 512                                | 256  | 128   | 64   | 32    | 16    | 8     | 4     | 2     | 1     | 0.5   |
| 17 | 0.04                               | 0.04 | 0.038 | 0.04 | 0.041 | 0.042 | 0.043 | 0.04  | 0.057 | 0.039 | 0.039 |
|    | 0.039                              | 0.04 | 0.043 | 0.04 | 0.04  | 0.041 | 0.043 | 0.041 | 0.041 | 0.041 | 0.04  |

Compound 17: % Hemolysis:

|         | Concentration ( $\mu\text{g/mL}$ ) |       |       |       |       |       |       |       |        |       |       |
|---------|------------------------------------|-------|-------|-------|-------|-------|-------|-------|--------|-------|-------|
|         | 512                                | 256   | 128   | 64    | 32    | 16    | 8     | 4     | 2      | 1     | 0.5   |
| 17      | 0.00%                              | 0.00% | 0.00% | 0.00% | 0.95% | 1.90% | 2.84% | 0.00% | 16.11% | 0.00% | 0.00% |
|         | 0.00%                              | 0.00% | 2.84% | 0.00% | 0.00% | 0.95% | 2.84% | 0.95% | 0.95%  | 0.95% | 0.00% |
| Average | 0.00%                              | 0.00% | 1.42% | 0.00% | 0.47% | 1.42% | 2.84% | 0.47% | 8.53%  | 0.47% | 0.00% |

1% Triton X 100 avg absorbance: 0.1445

DMSO control avg absorbance: 0.039

Supplementary Table 4. Solubility assay.

| Compound    | Rt, min | Transition (CE 30eV) | Solubility, $\mu\text{g/ml}$ |
|-------------|---------|----------------------|------------------------------|
| Rimomycin A | 3.402   | 1121.36 to 1104.35   | 6.1                          |
| <b>17</b>   | 3.017   | 659.78 to 113.10     | 98.6                         |
| <b>6</b>    | 2.810   | 589.22 to 107.05     | 28.4                         |
| <b>7</b>    | 2.856   | 589.22 to 107.05     | 8.3                          |
| <b>21</b>   | 3.8     | 1243.41 to 1243.41   | 16.4                         |

# Analytical Data for Rimomycin Analogs 1-32

UV chromatograms of DMSO-blank

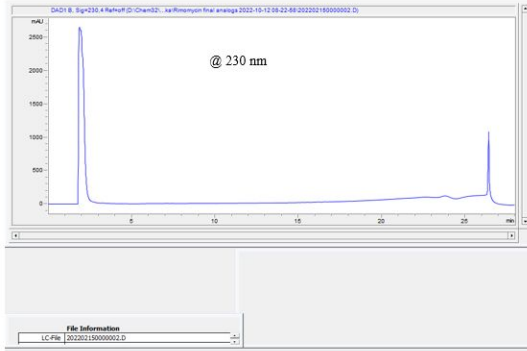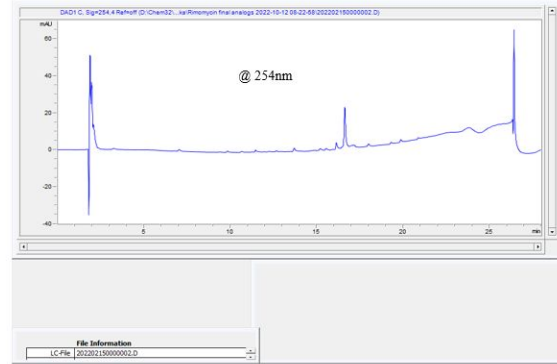

## Compound 1

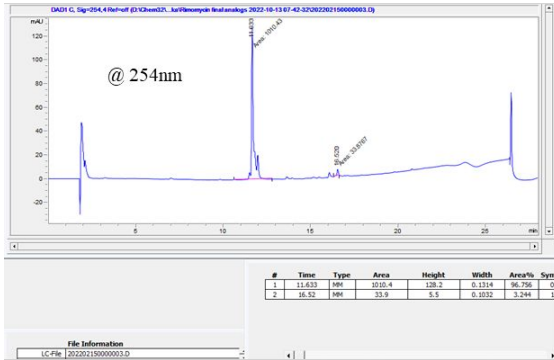

Compound 1

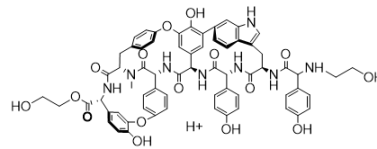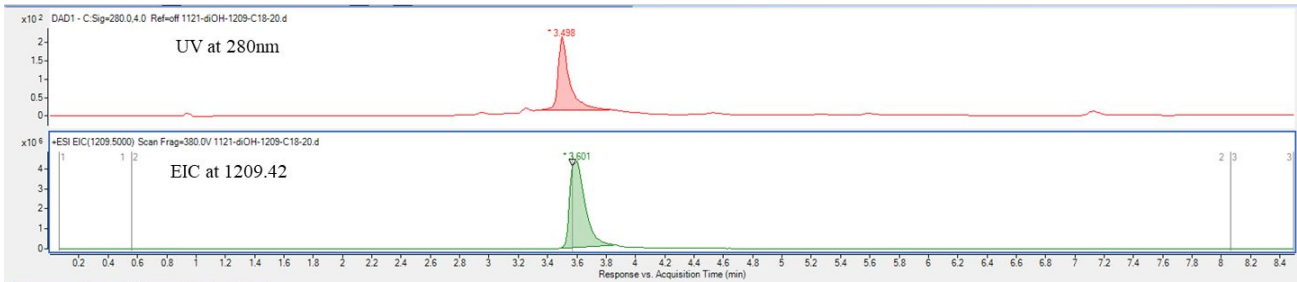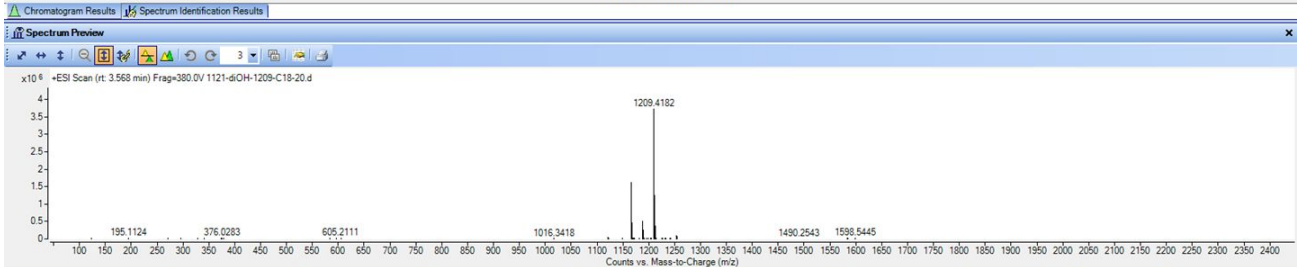

<sup>1</sup>H-NMR of compound 1

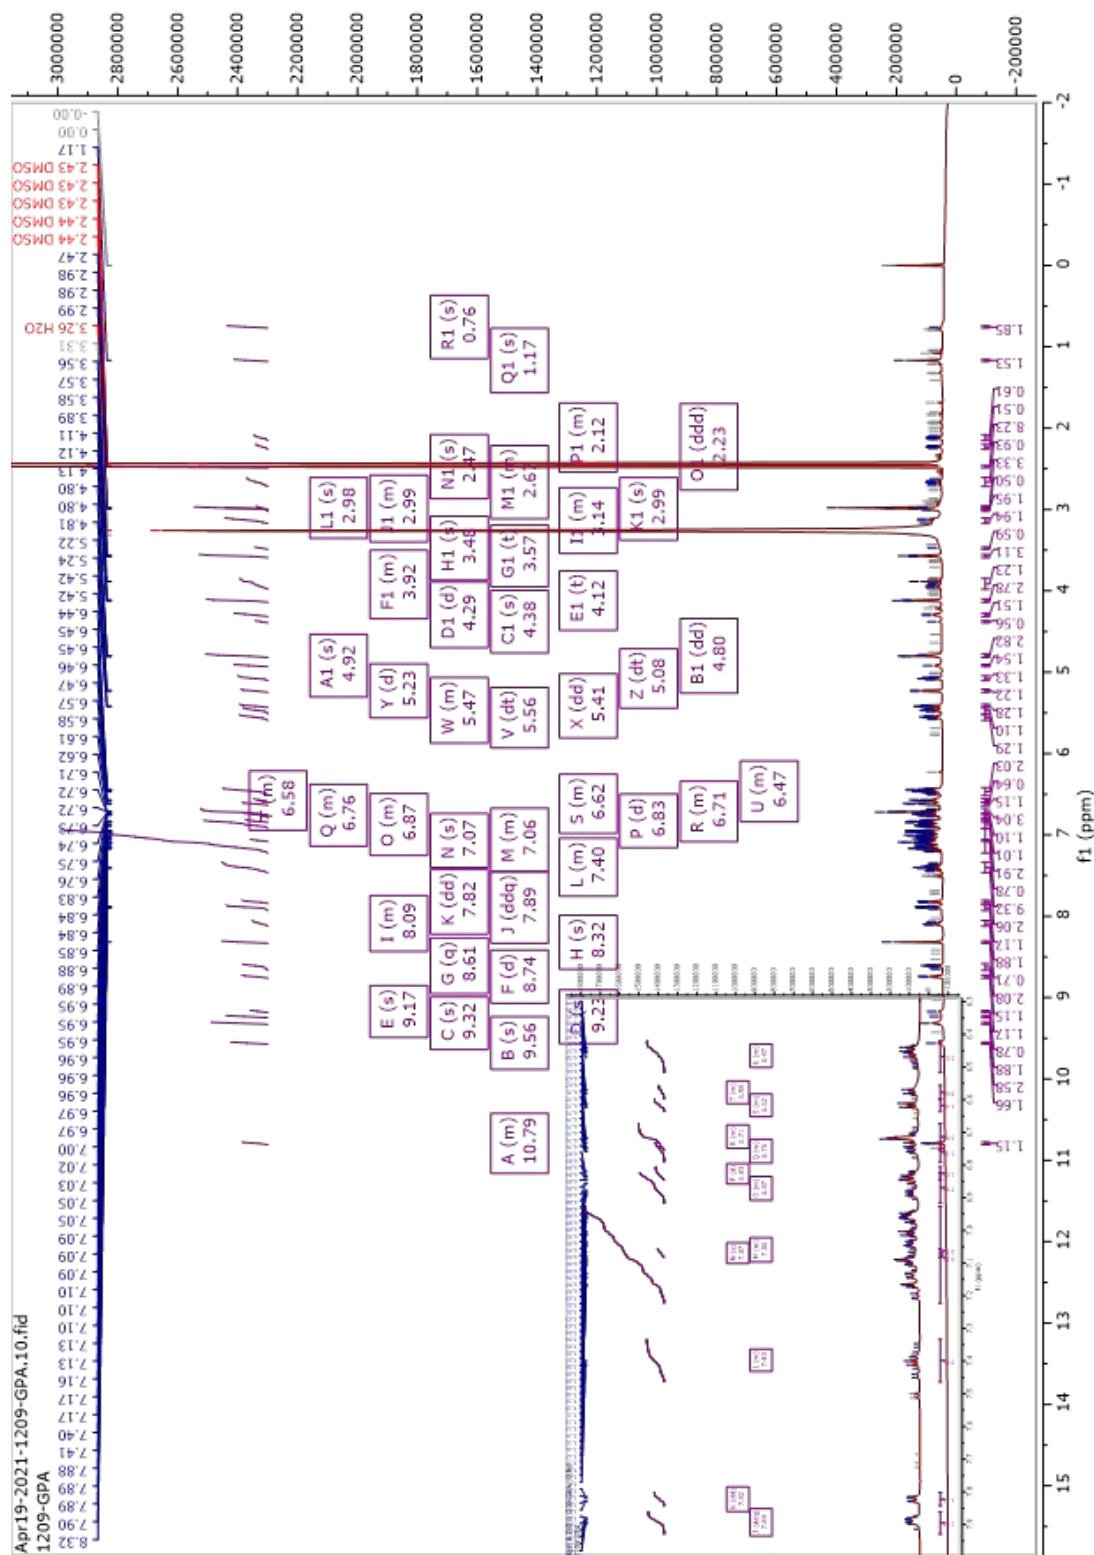



# $^{13}\text{C}$ -NMR of compound 1

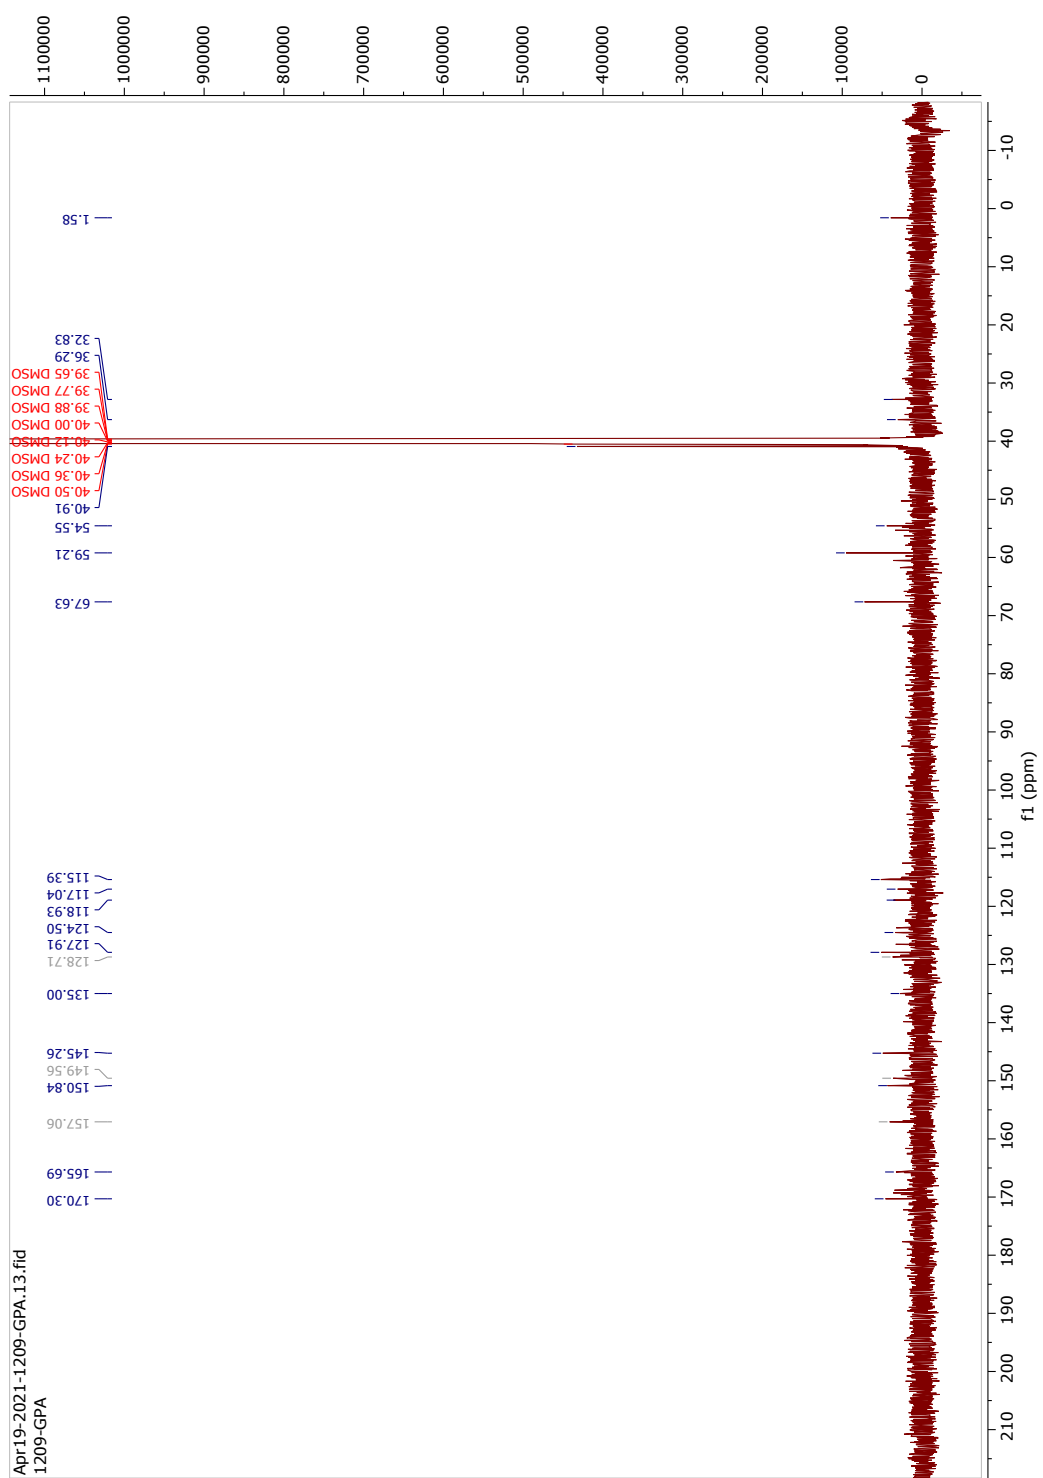

## Compound 2

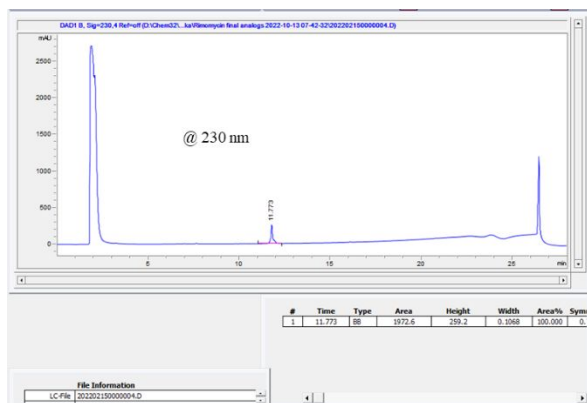

Compound 2

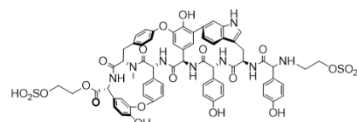

Chemical Formula:  $C_{43}H_{49}N_8O_{20}S_2^-$   
 Exact Mass: 1335.3293

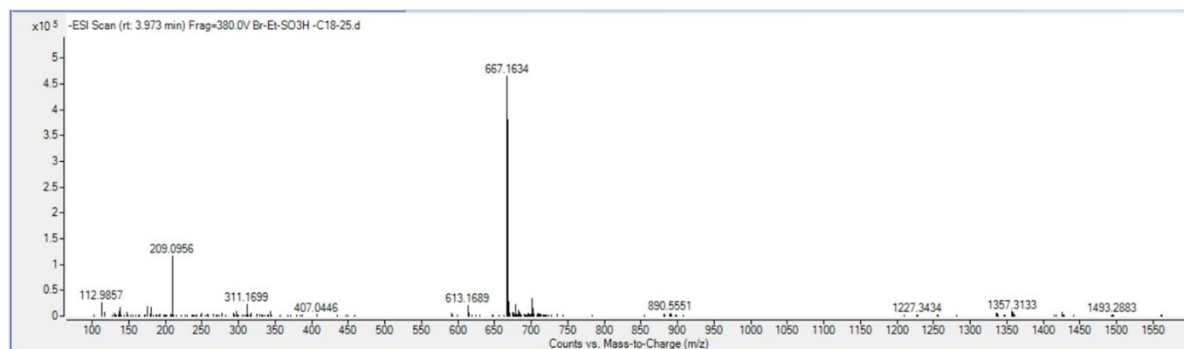

<sup>1</sup>H-NMR of compound 2

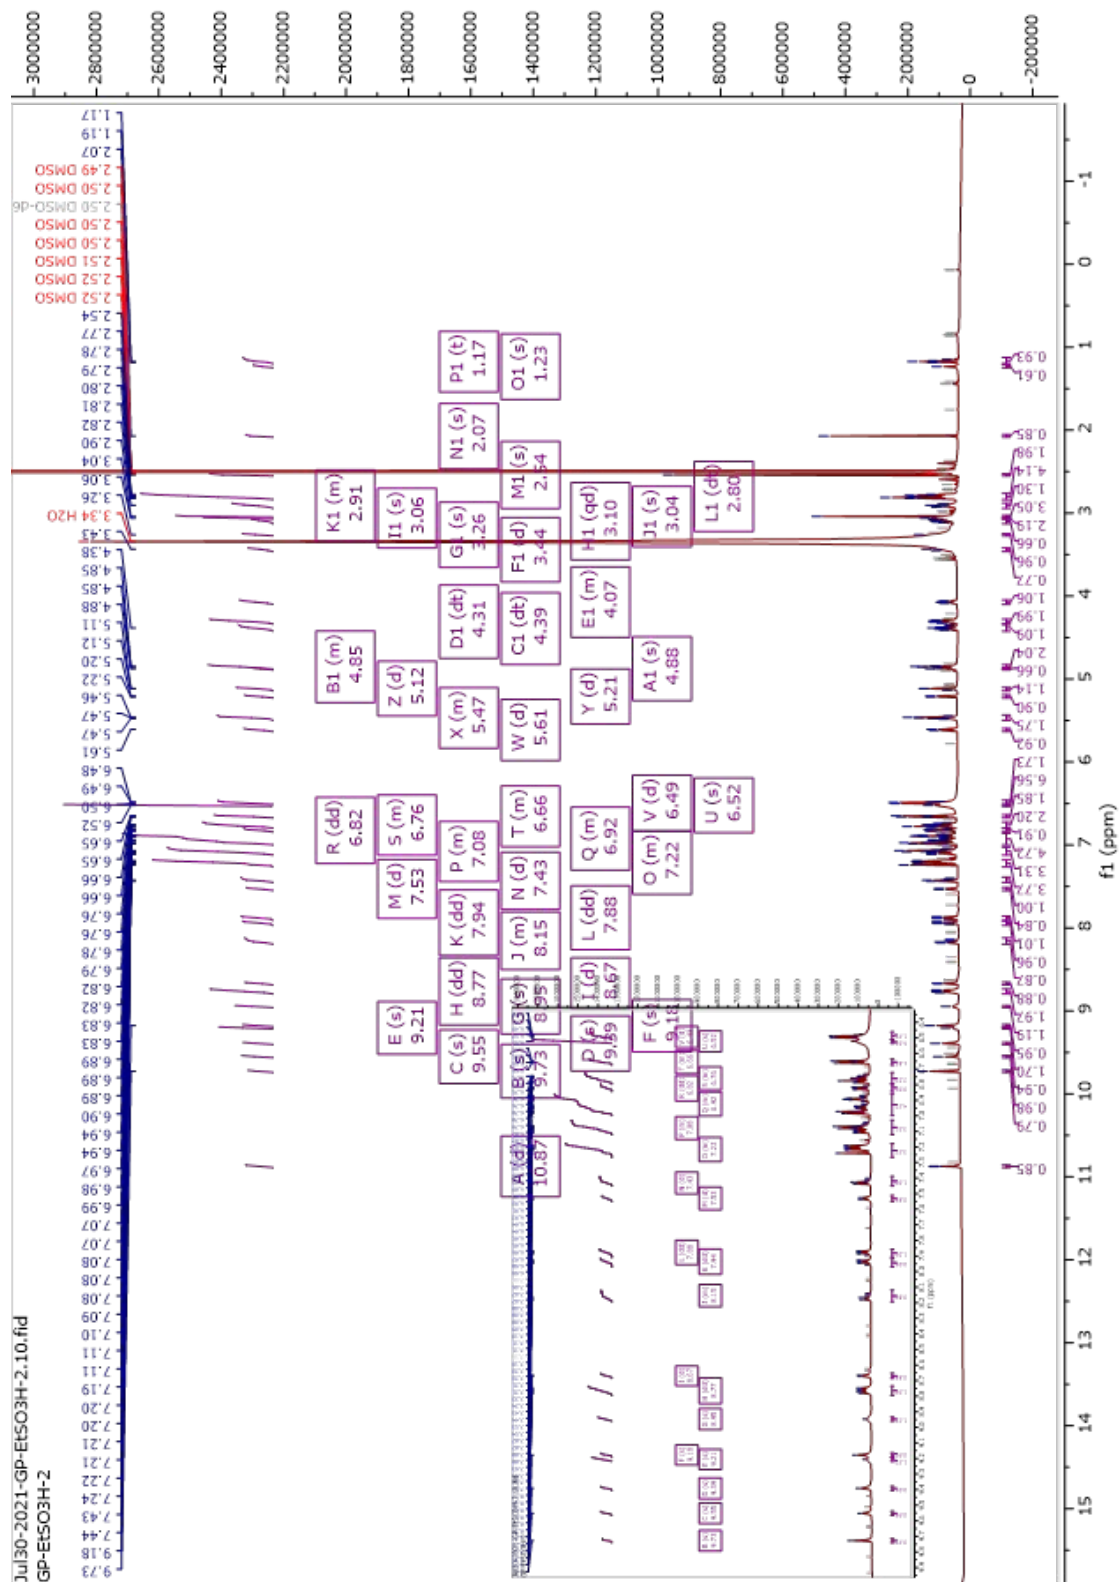

# <sup>13</sup>C-NMR of compound 2

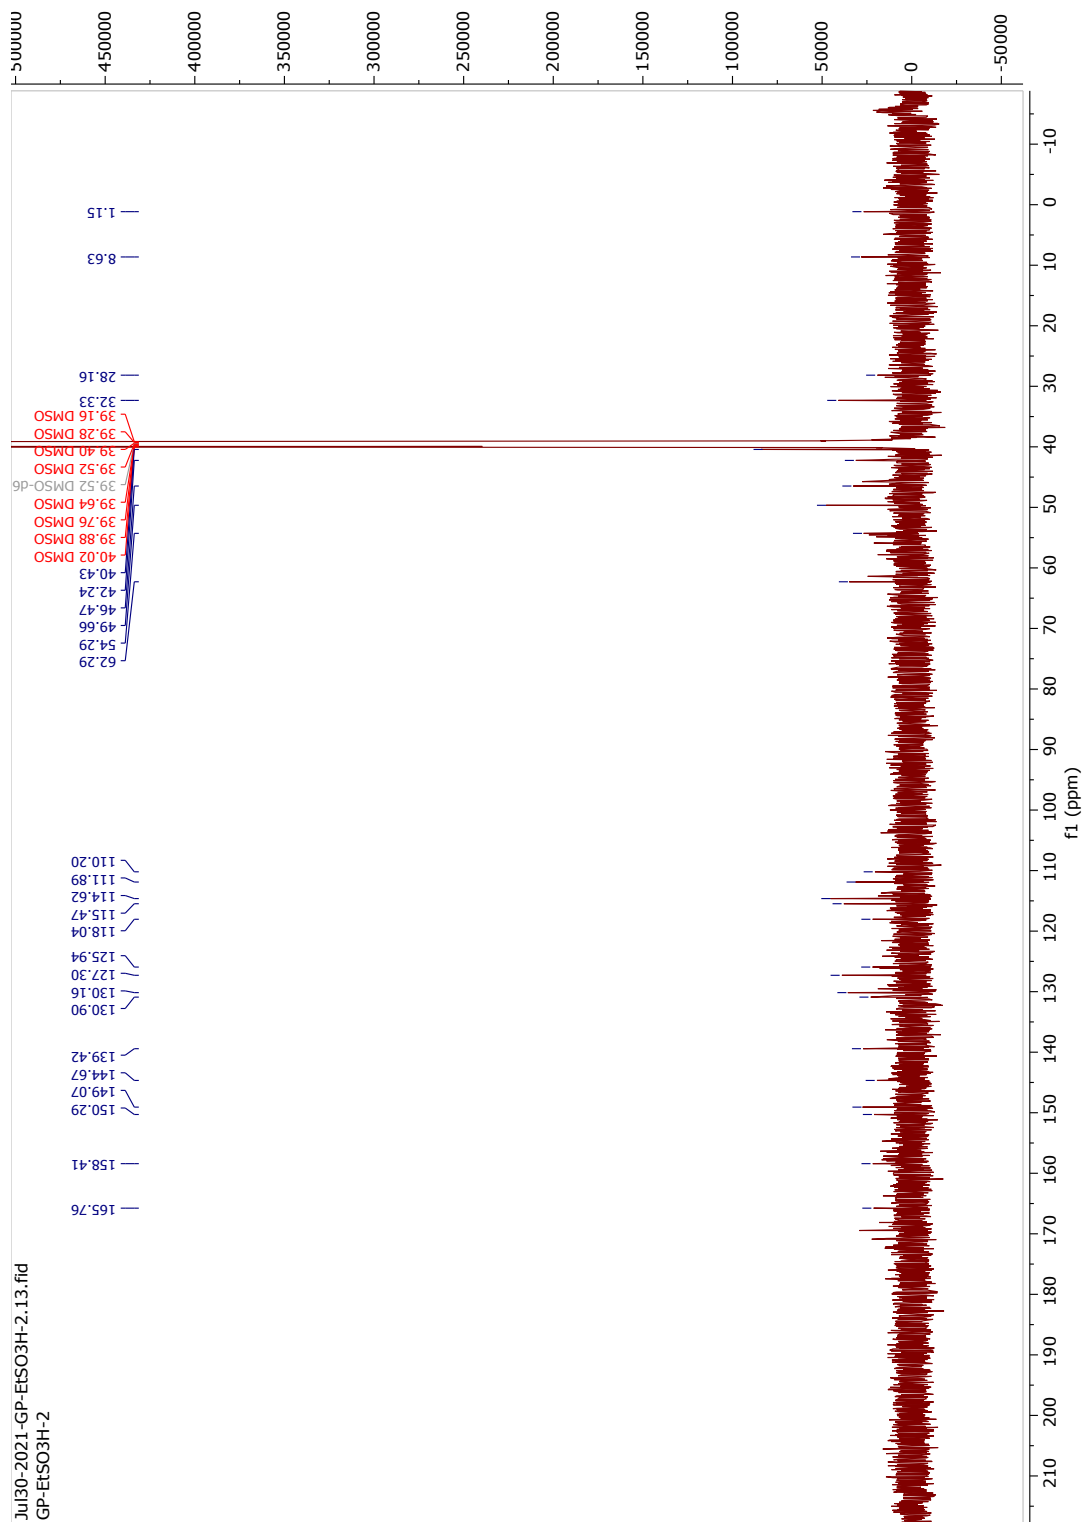

# Compound 3

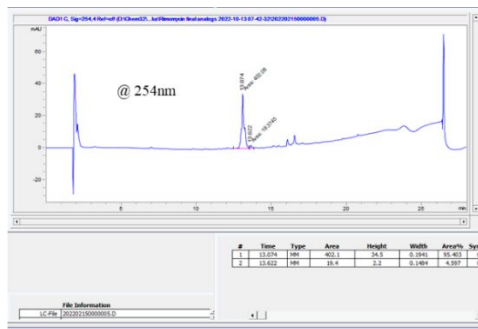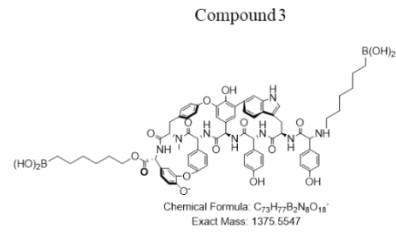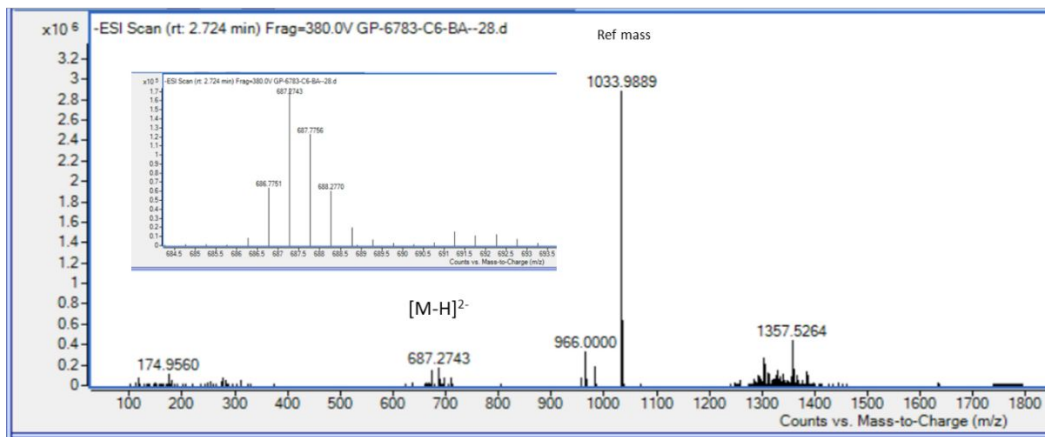



# <sup>13</sup>C-NMR of compound 3

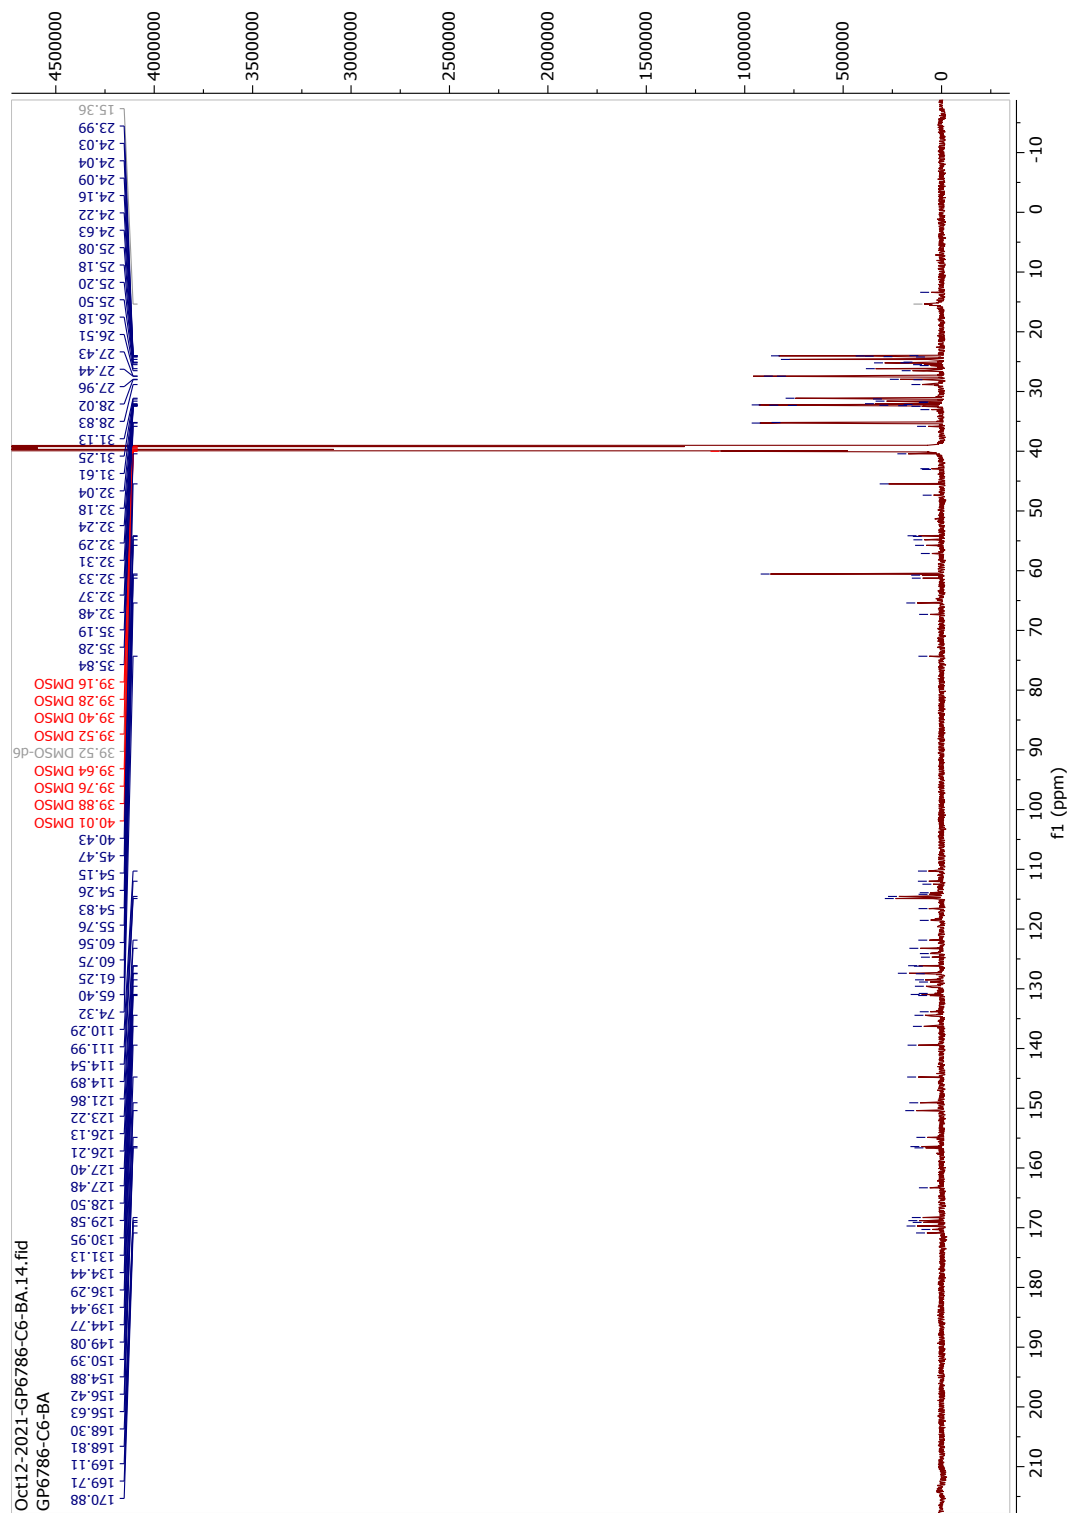

# Compound 4

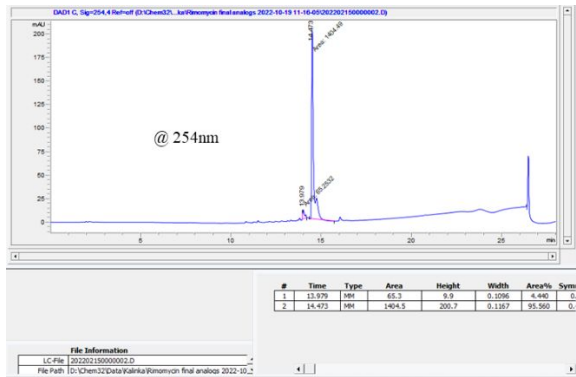

Compound 4

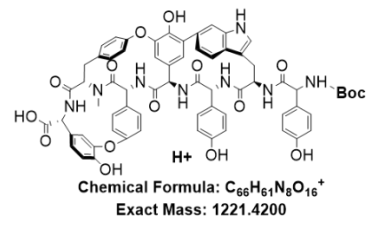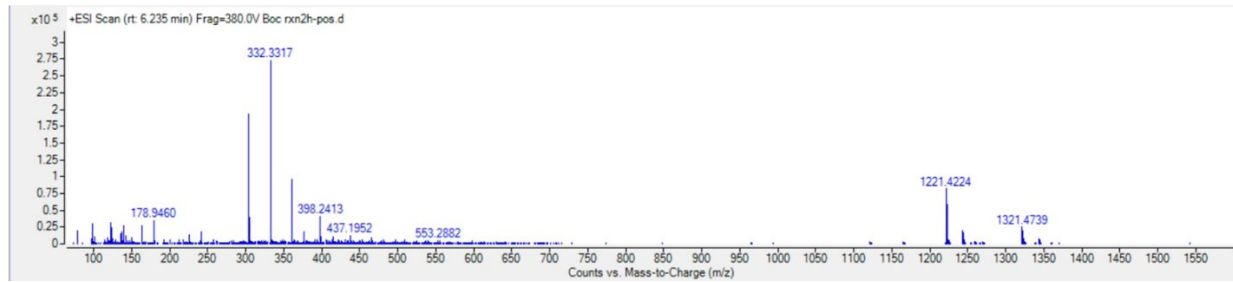



# <sup>1</sup>H-NMR of compound 4

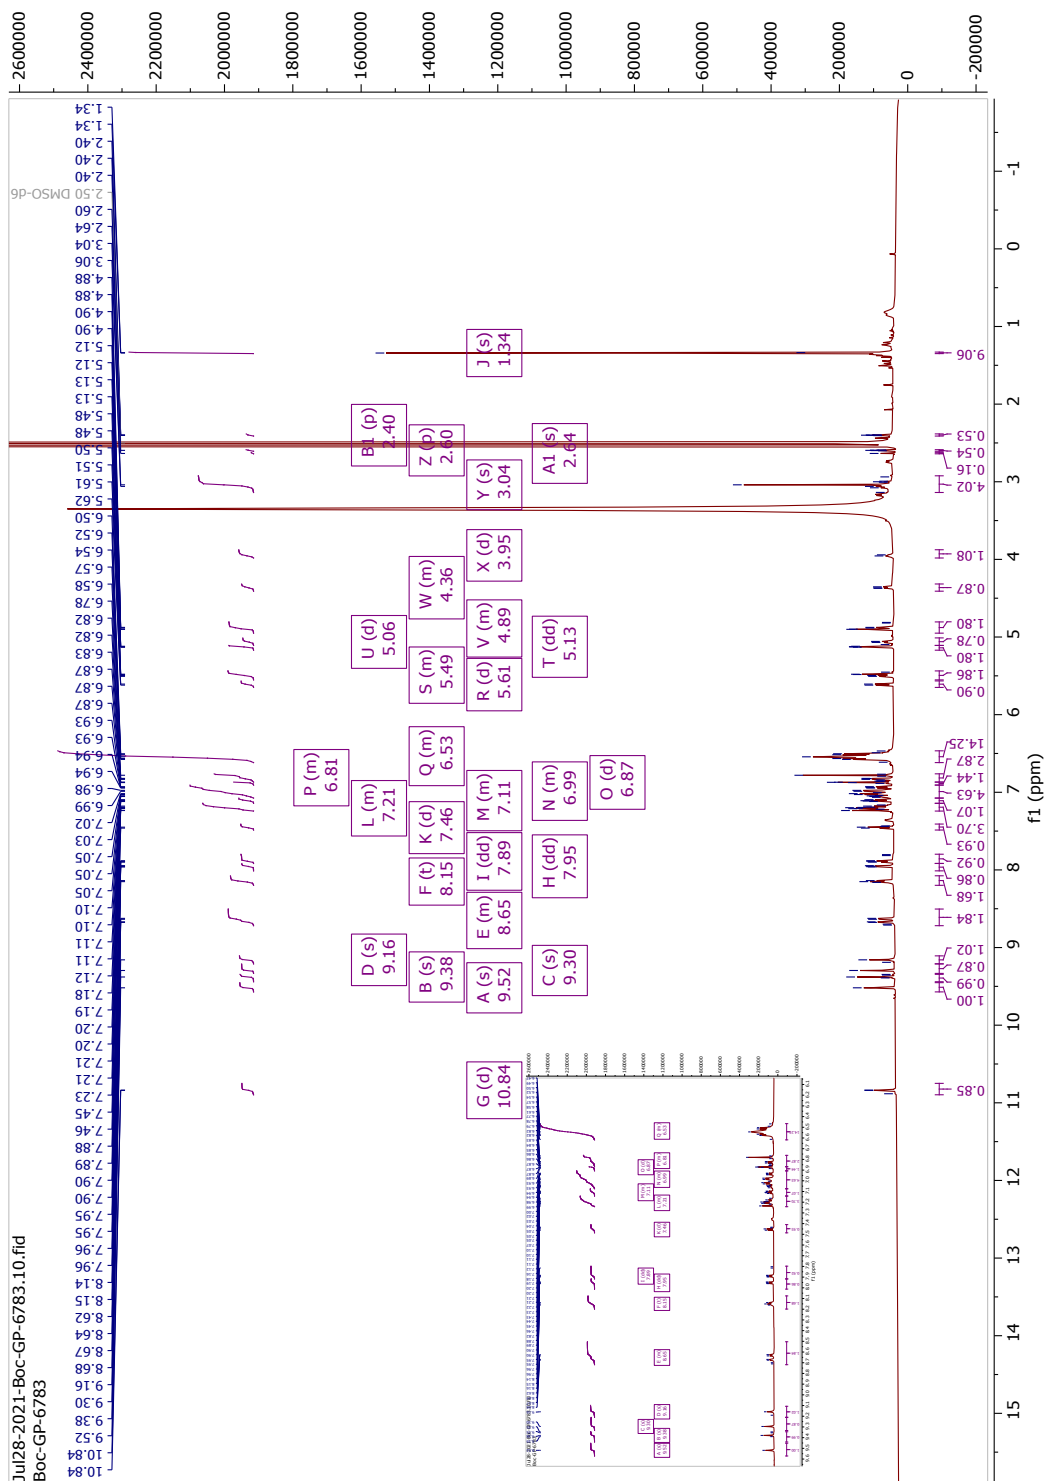

# $^{13}\text{C}$ -NMR of compound 4

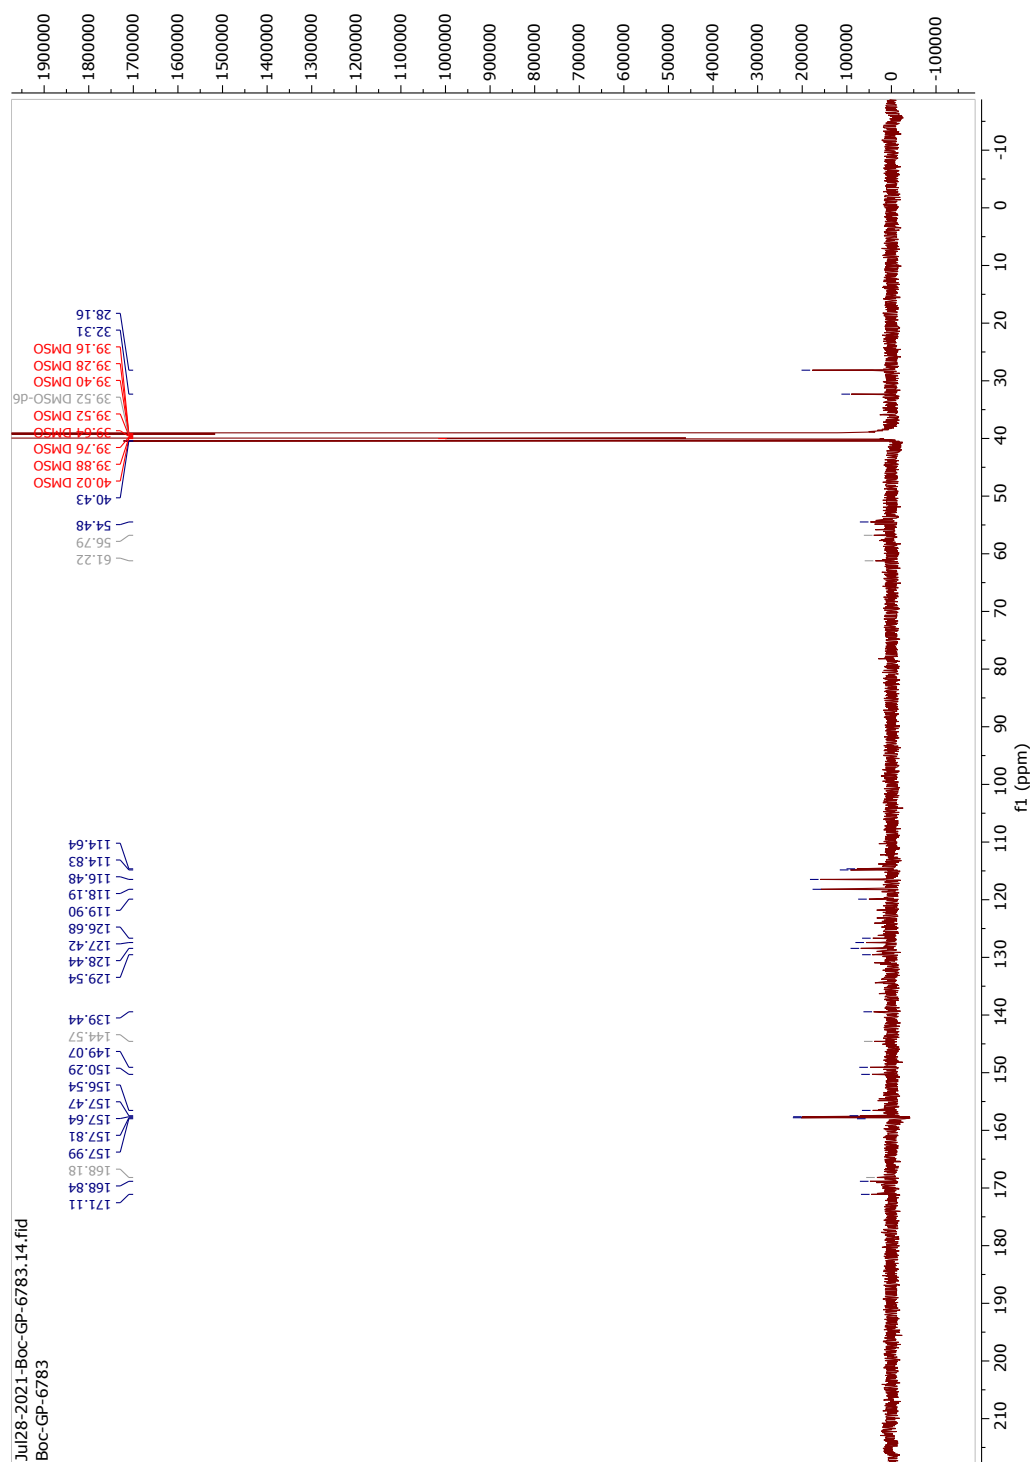

## Compound 5

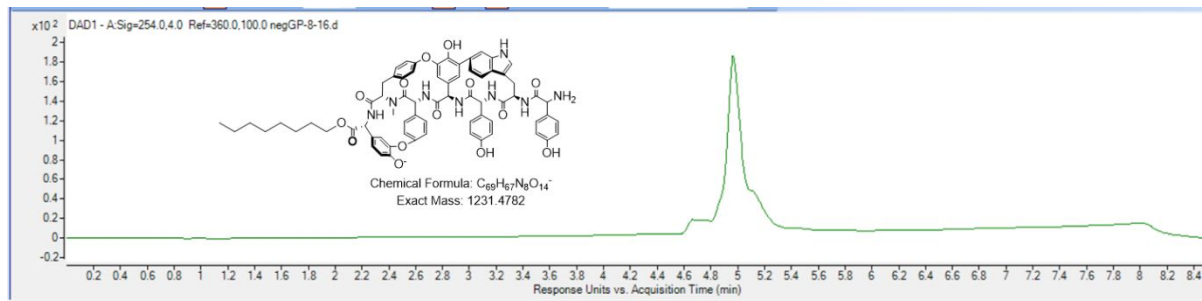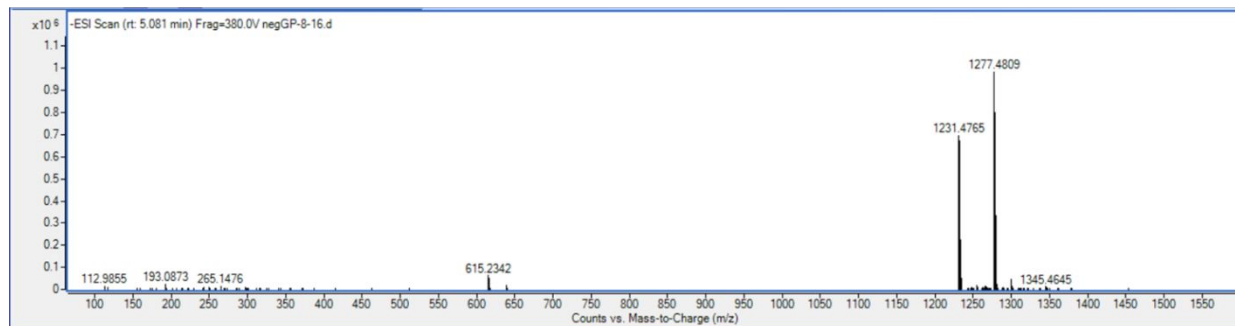

<sup>1</sup>H-NMR of compound 5

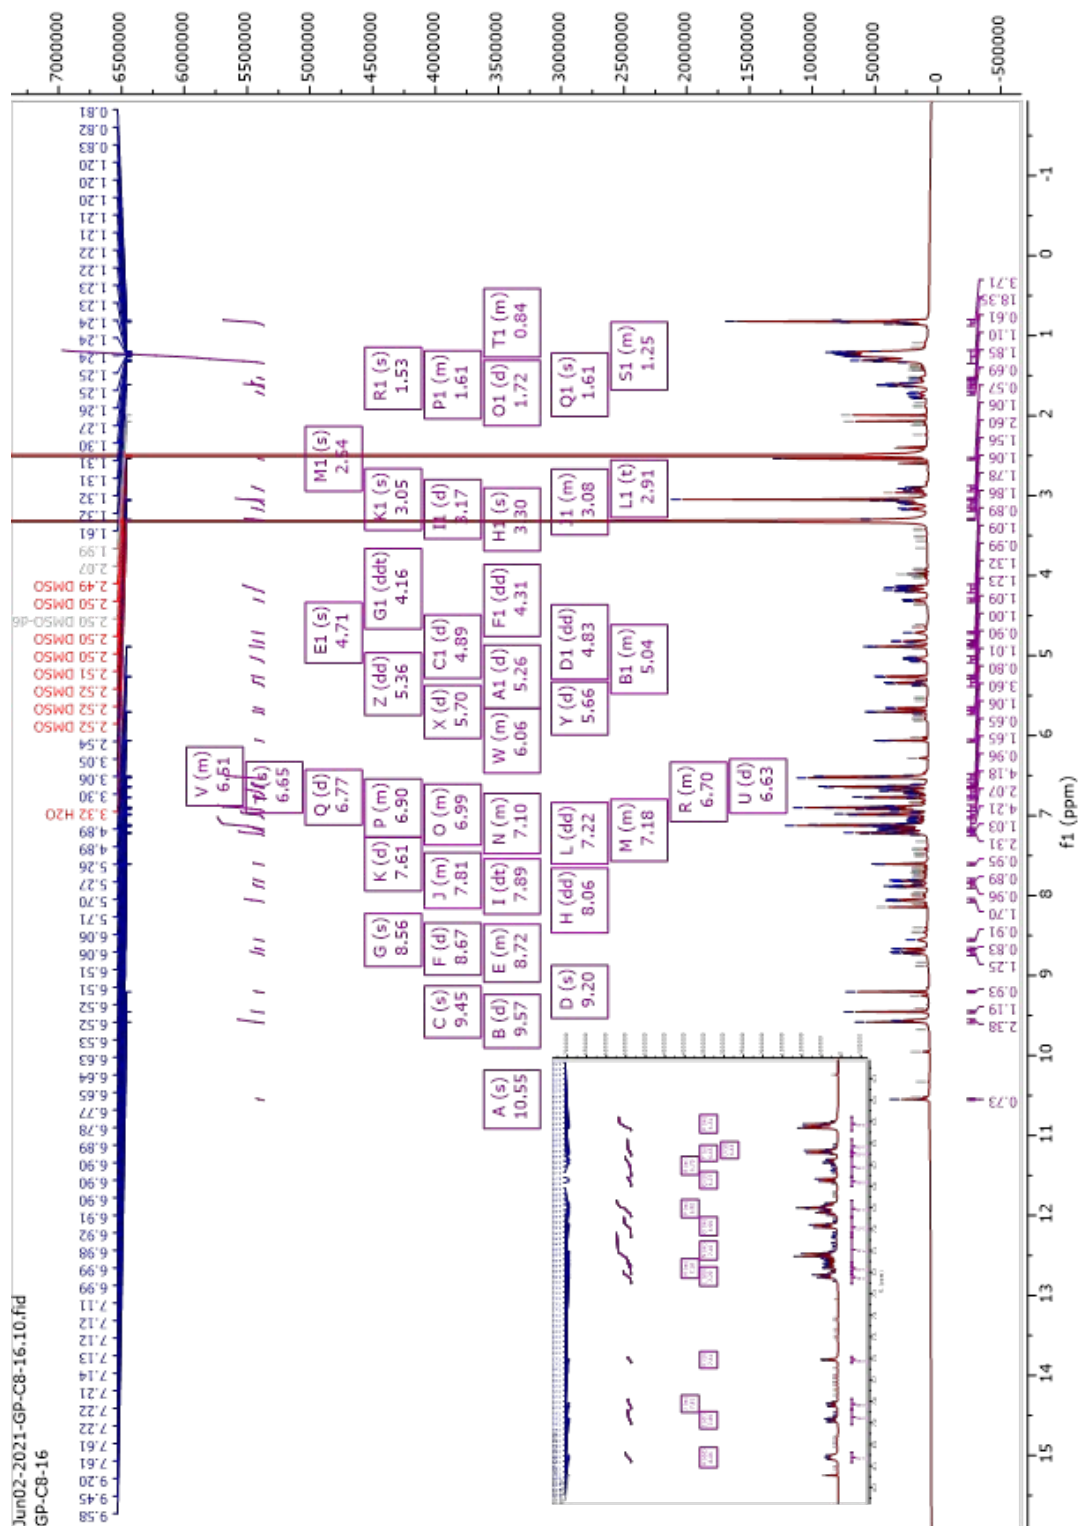

# $^{13}\text{C}$ -NMR of compound 5

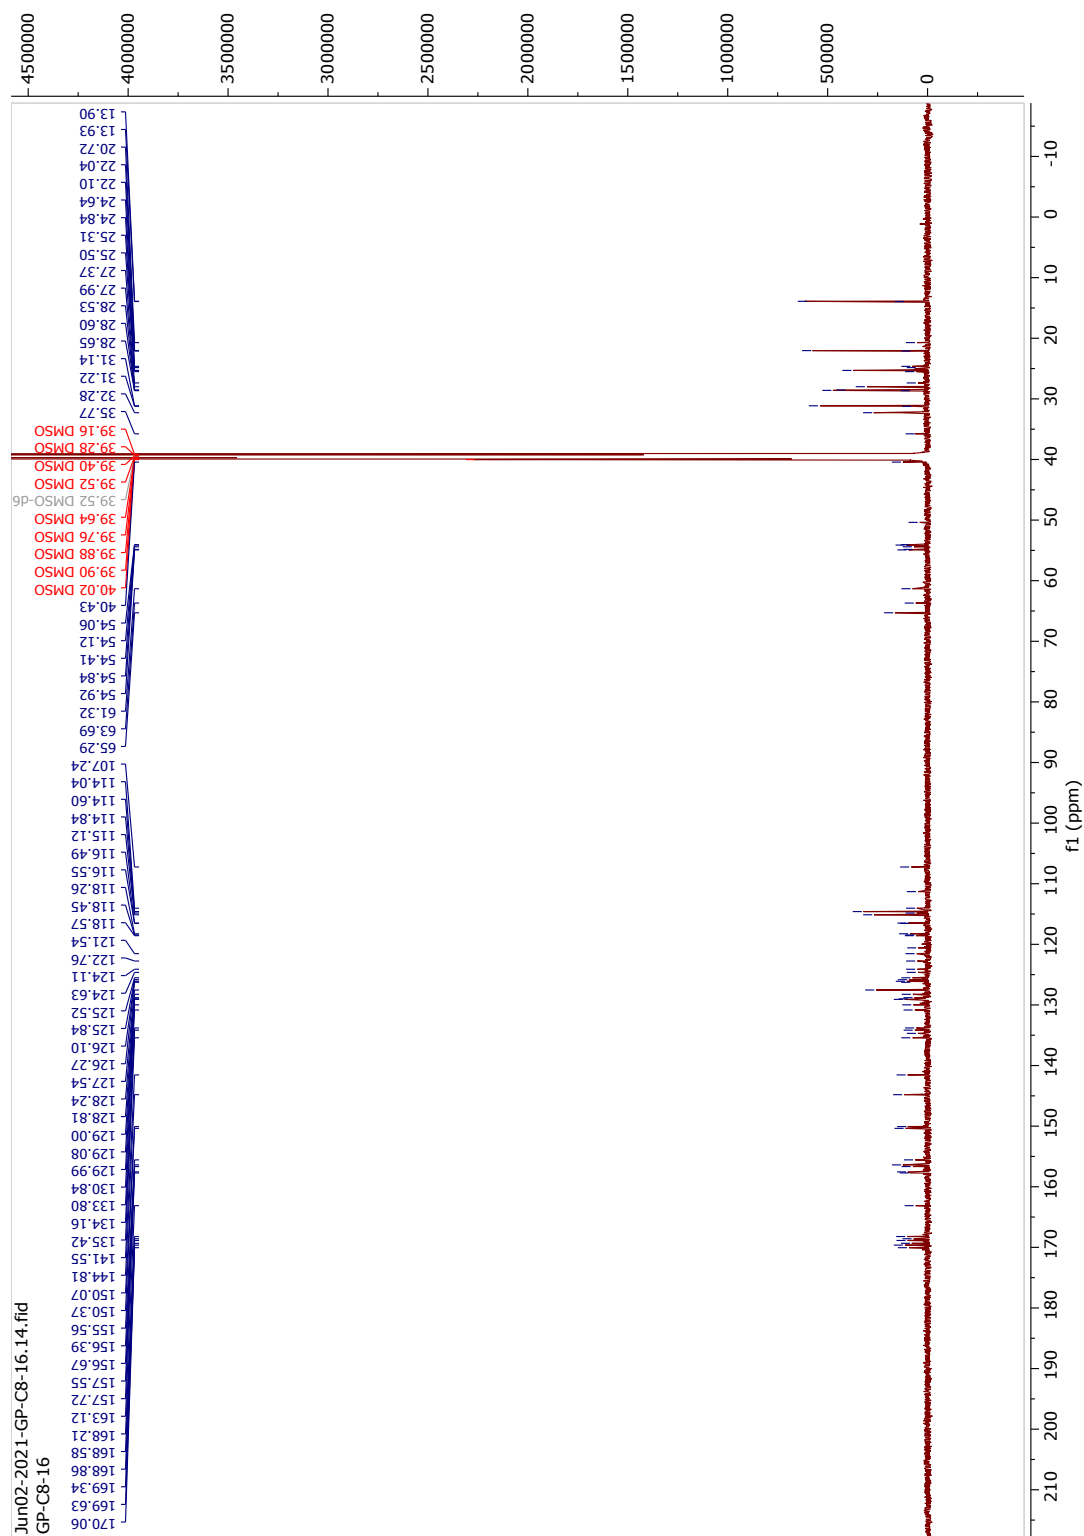





# $^{13}\text{C}$ -NMR of compound 6

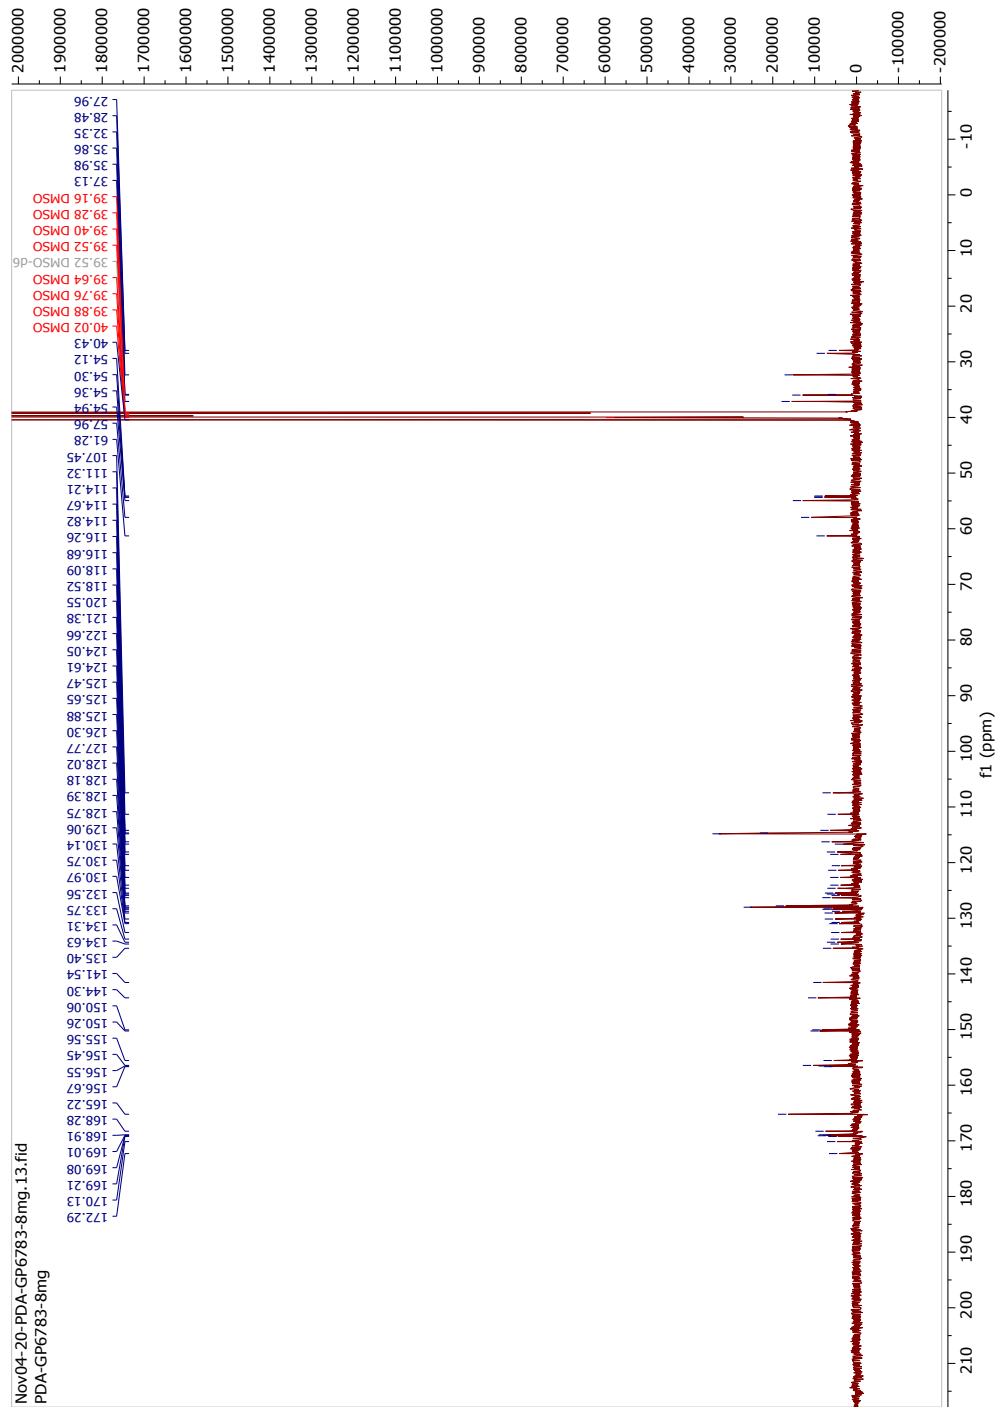



# Compound 7

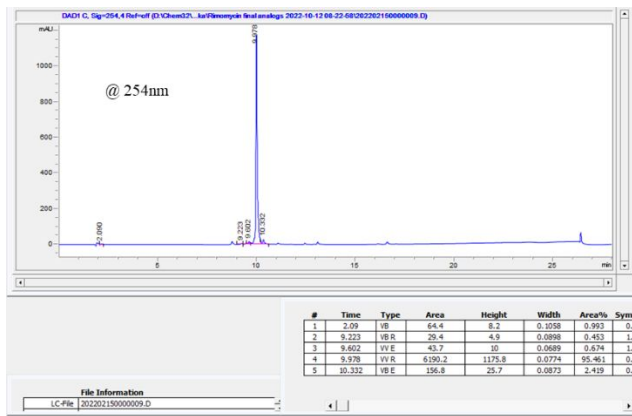

Compound 7

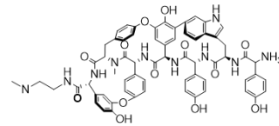

Chemical Formula:  $C_{64}H_{61}N_{10}O_{13}^{2+}$   
Exact Mass: 1177.4409

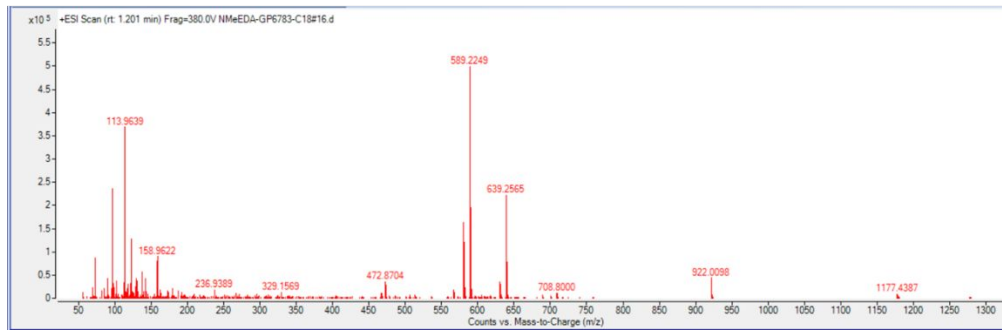



# $^{13}\text{C}$ -NMR of compound 7

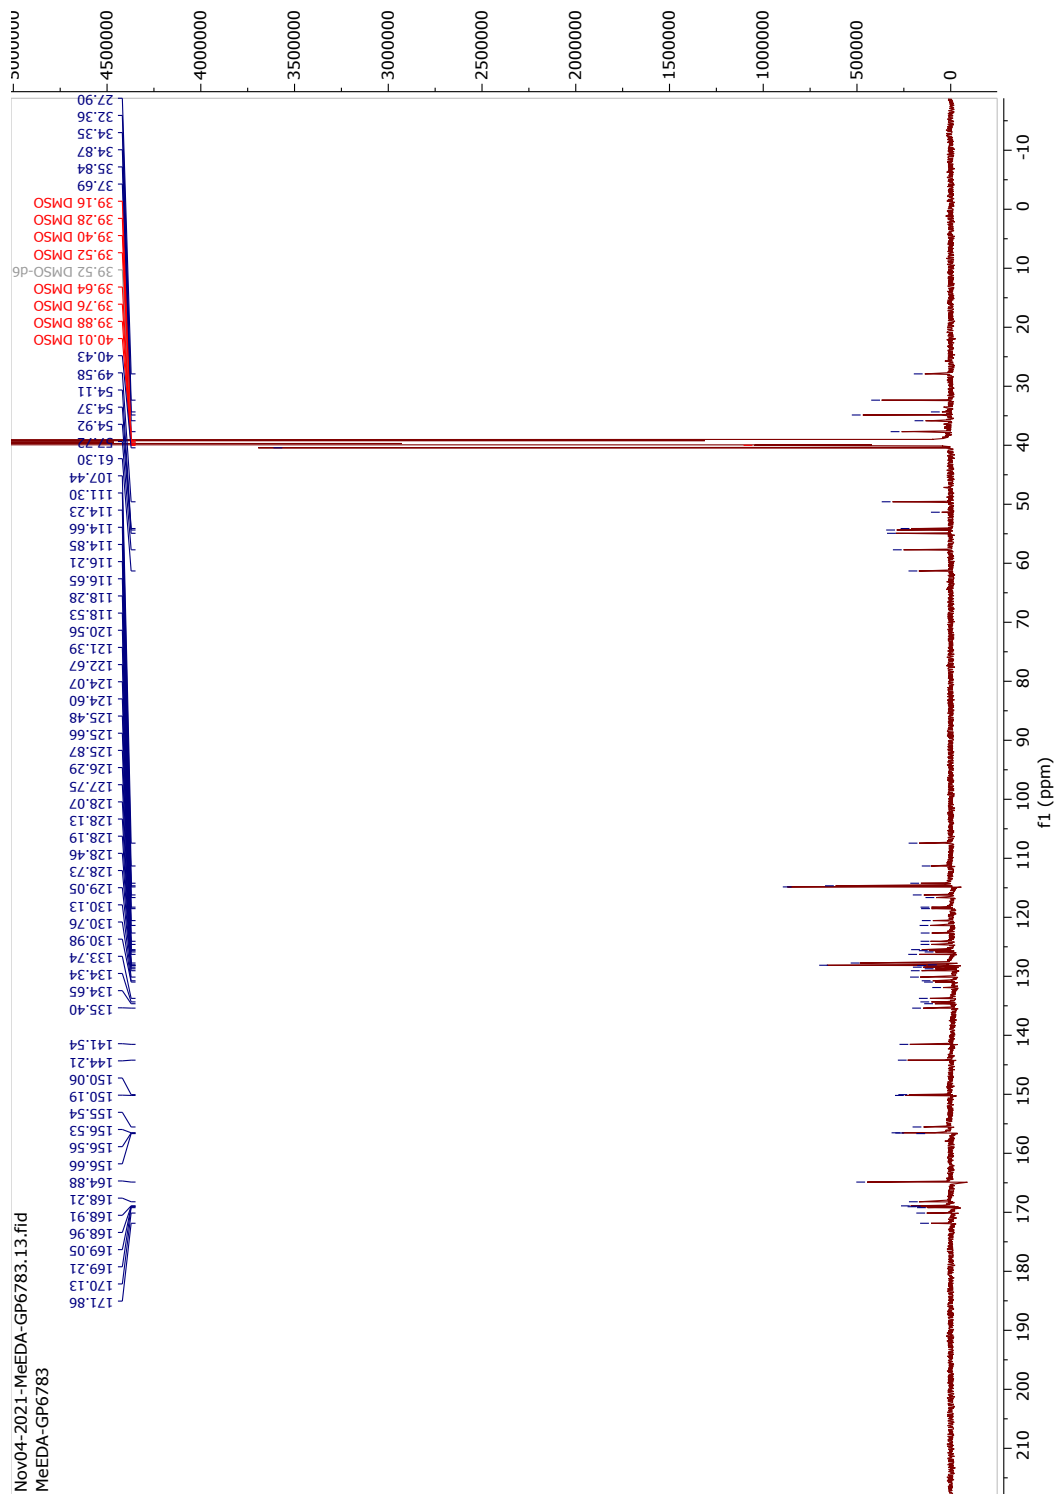

# Compound 8

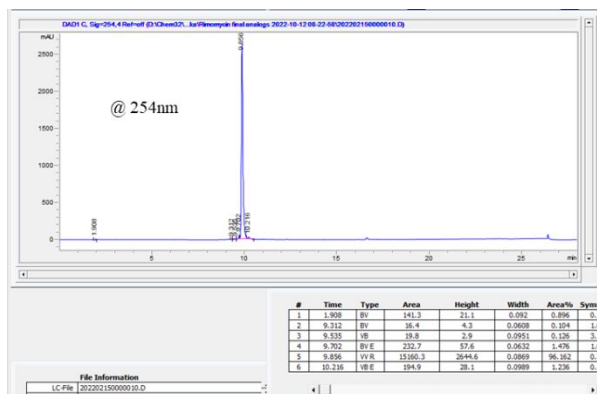

Compound 8

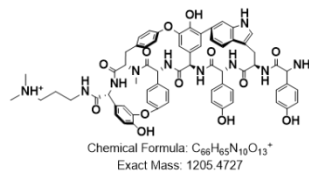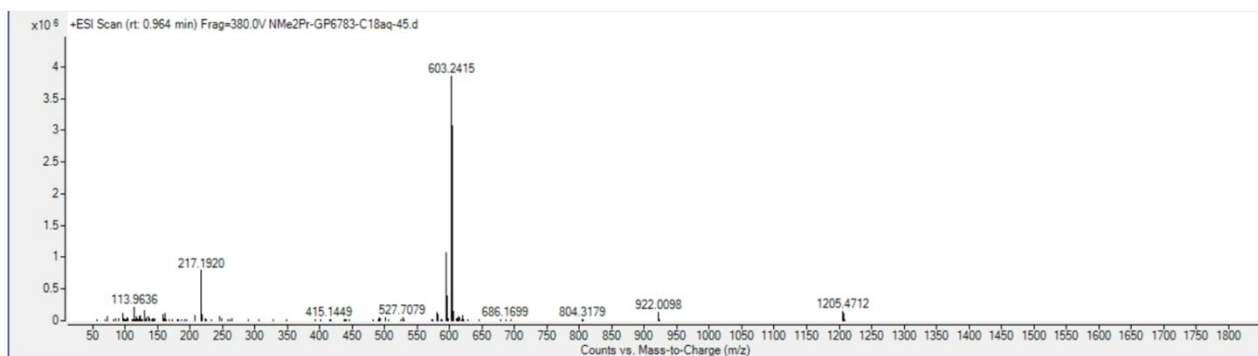

<sup>1</sup>H-NMR of compound **8**

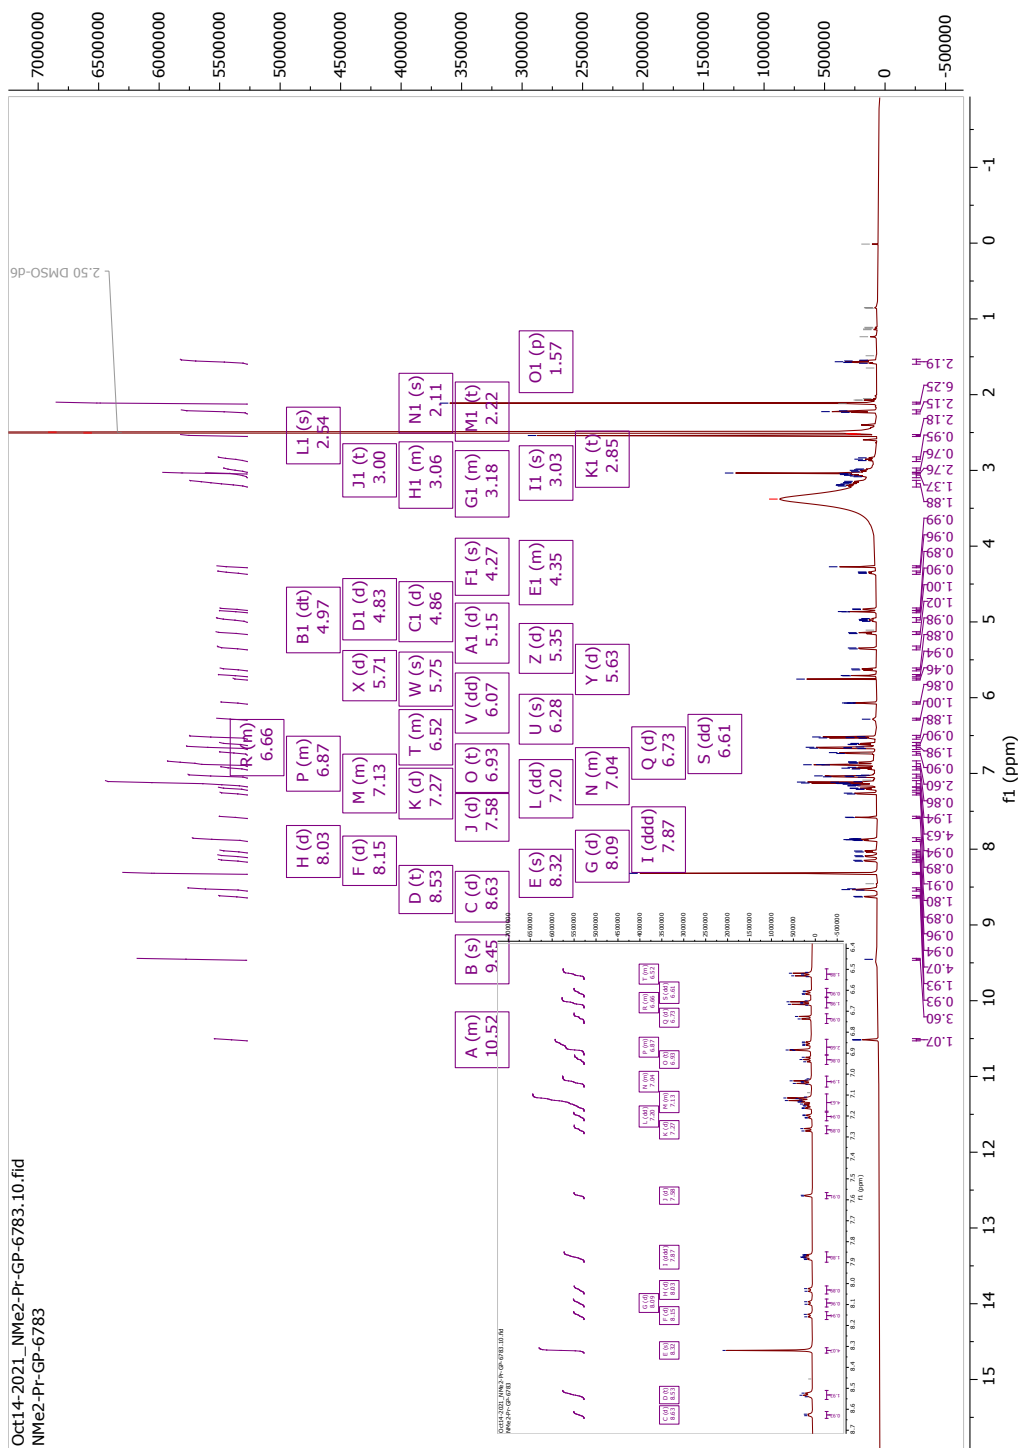

# <sup>13</sup>C-NMR of compound 8

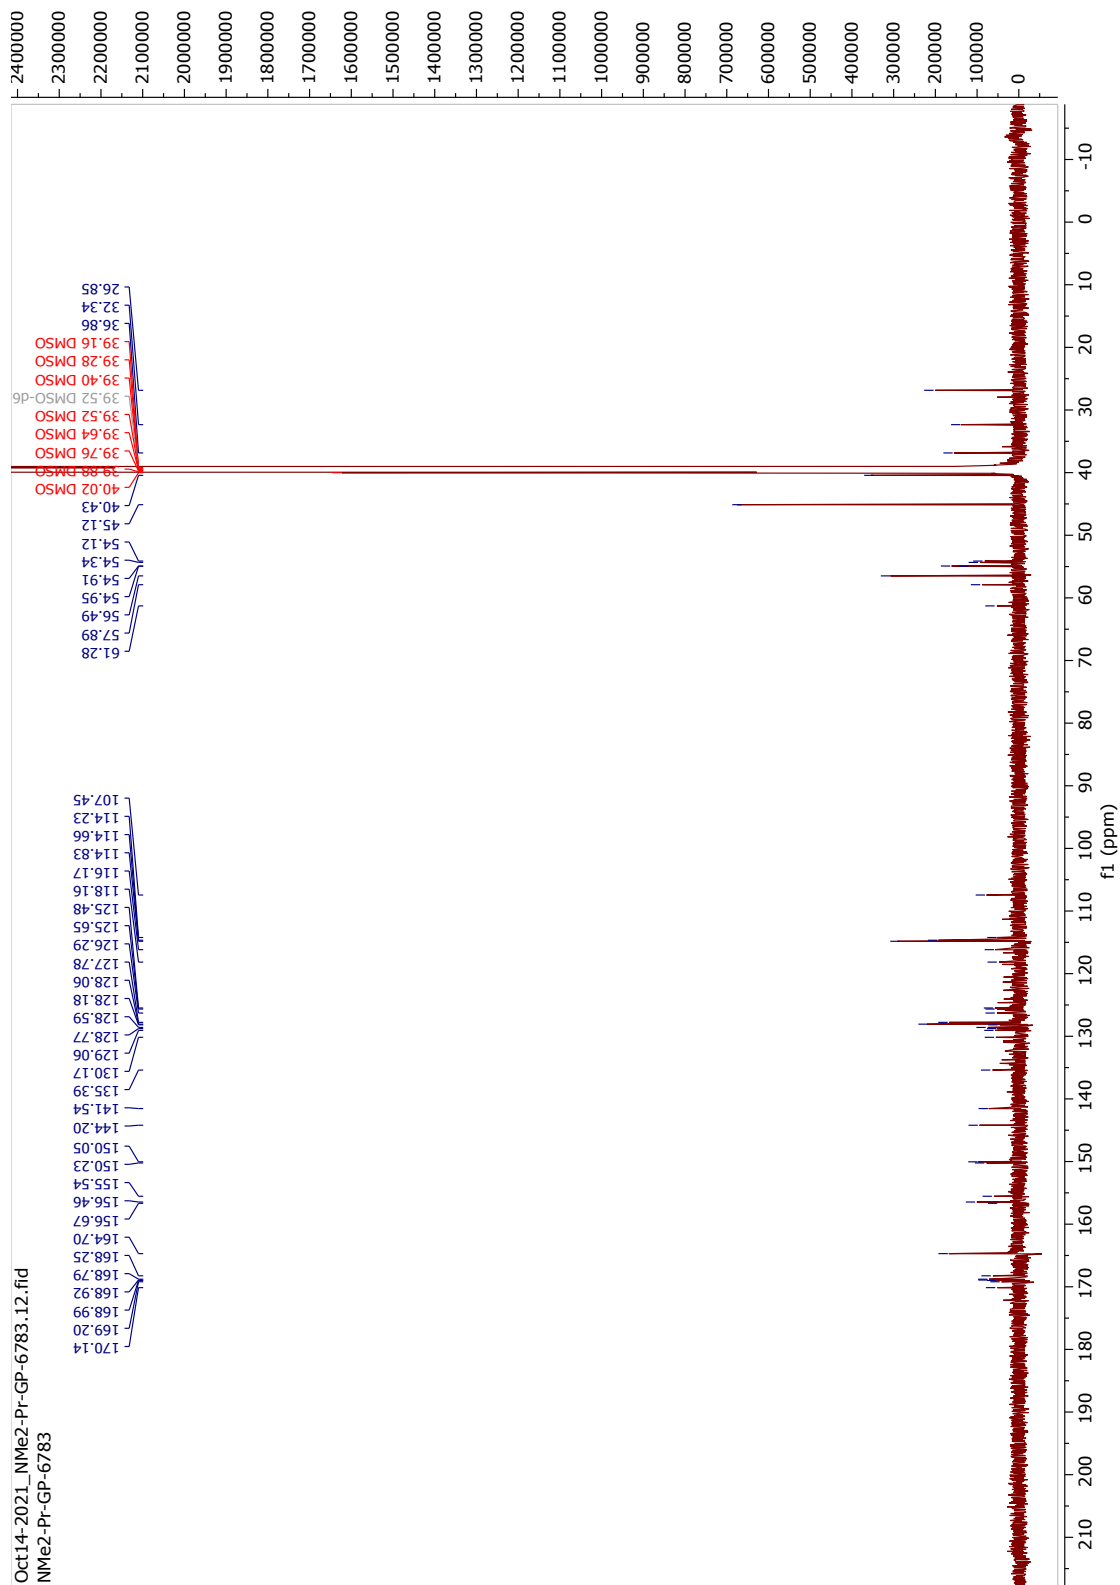

# Compound 9

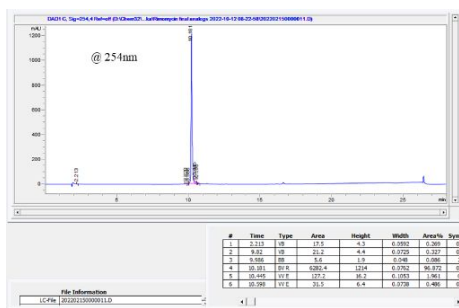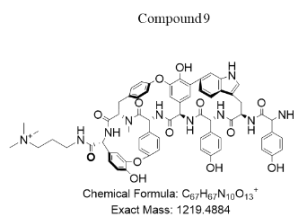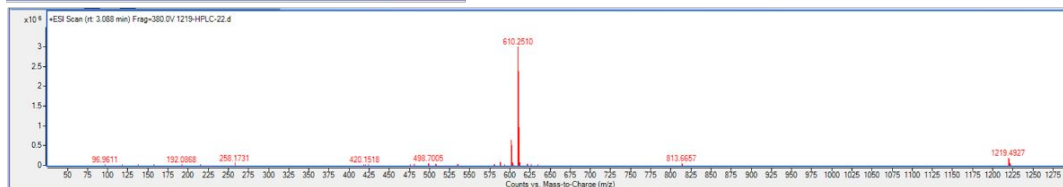

<sup>1</sup>H-NMR of compound **9**

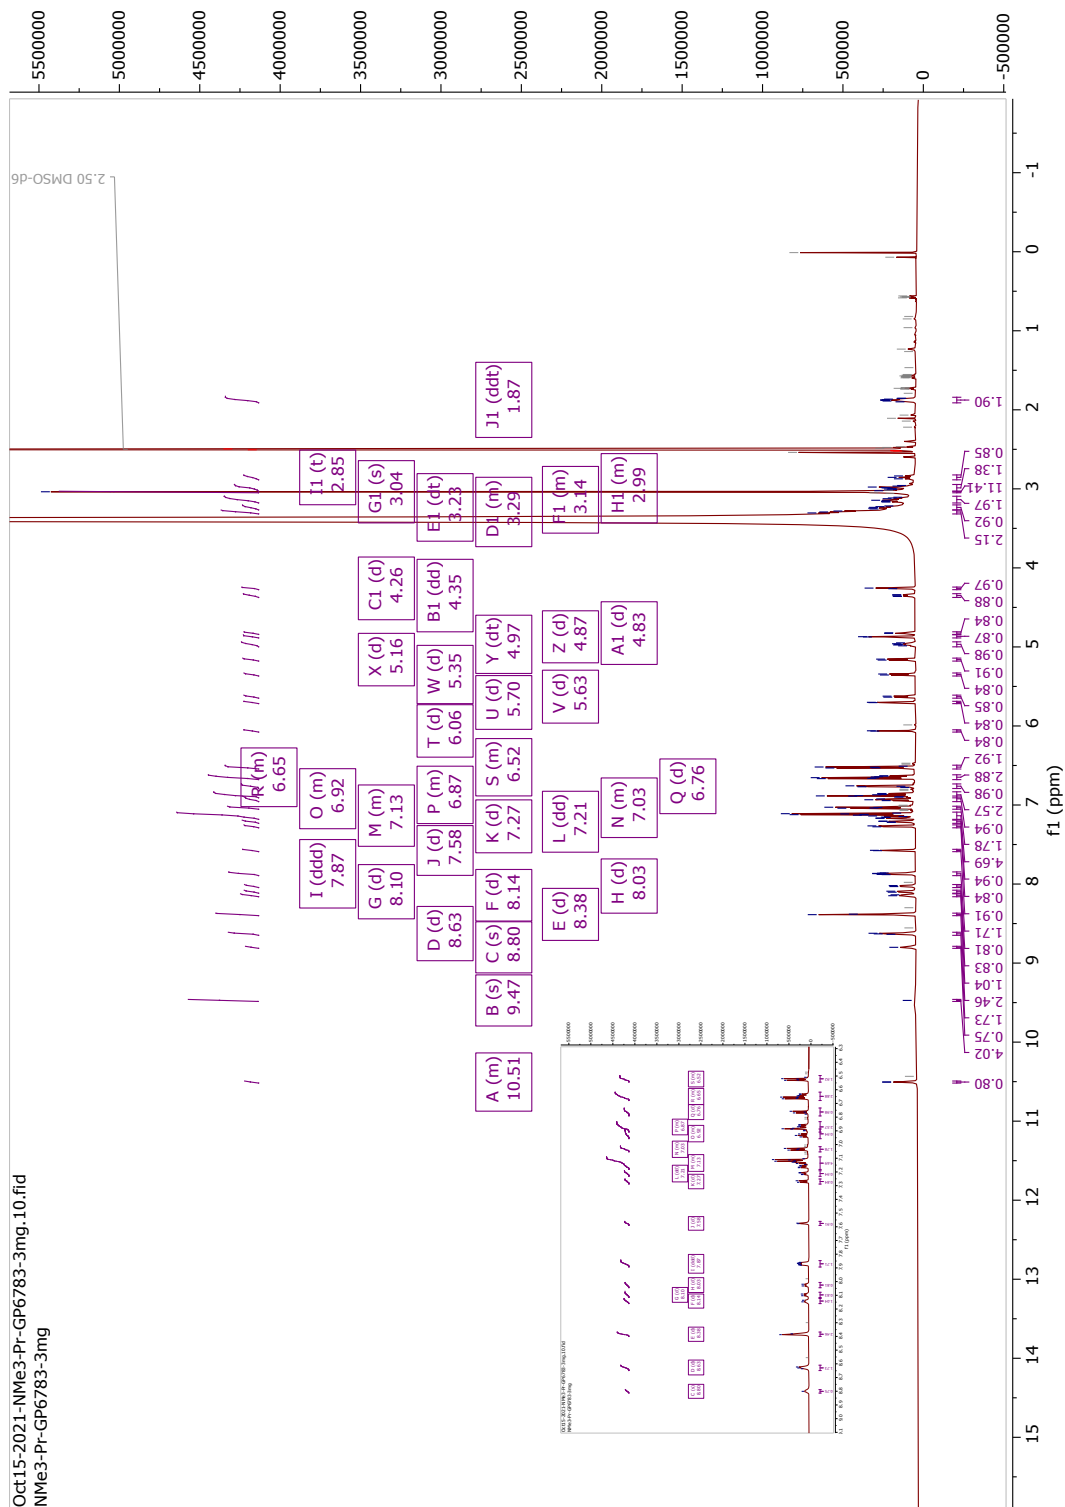



# <sup>13</sup>C-NMR of compound 9

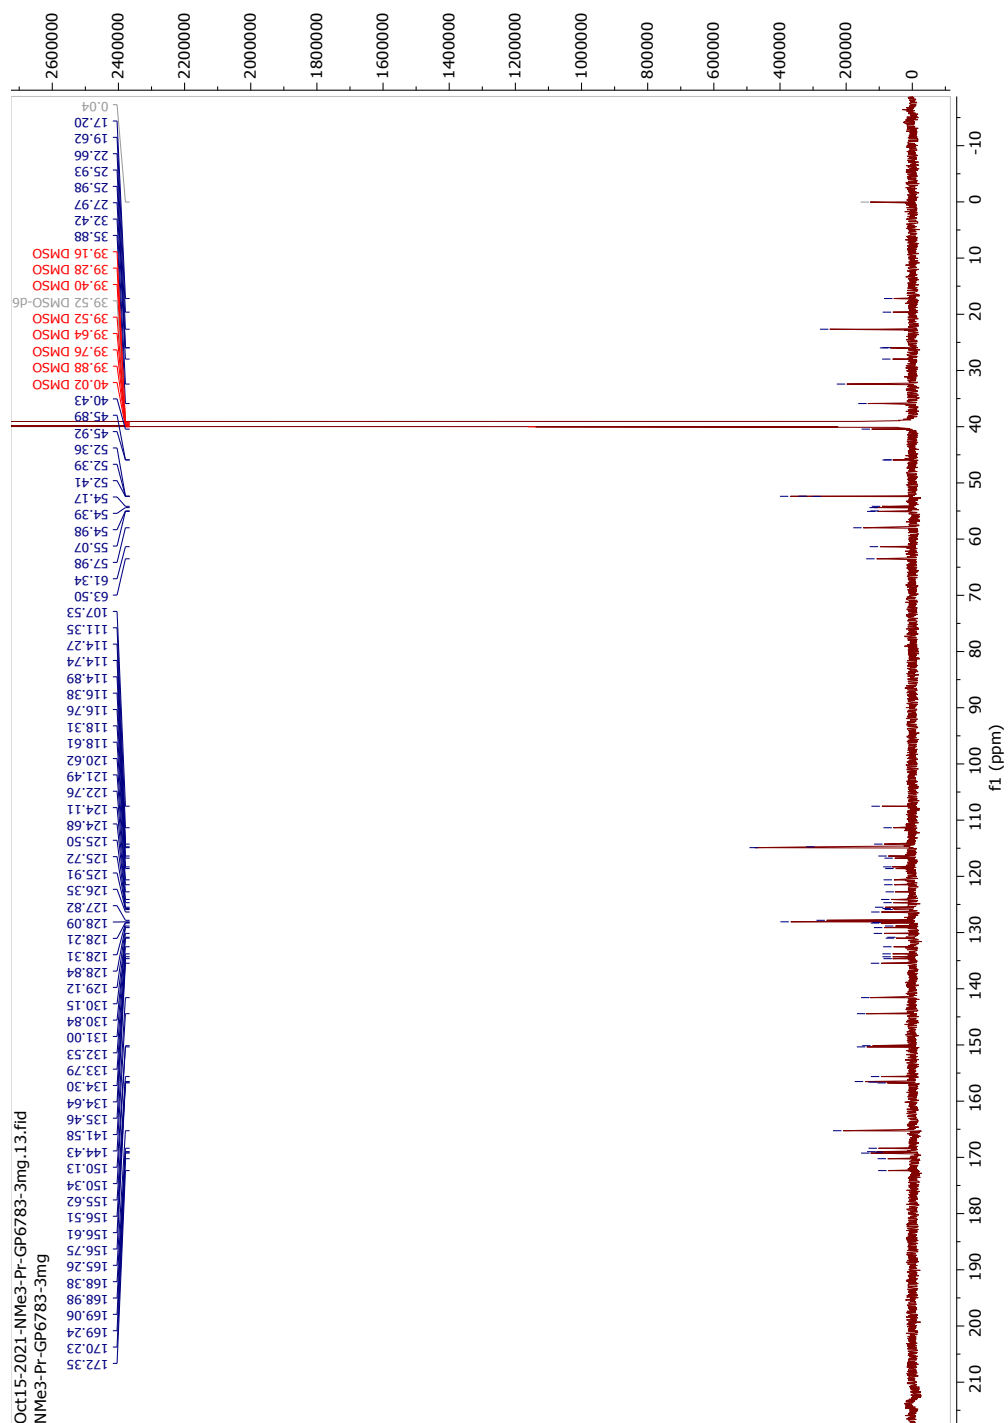



<sup>1</sup>H-NMR of compound **10**

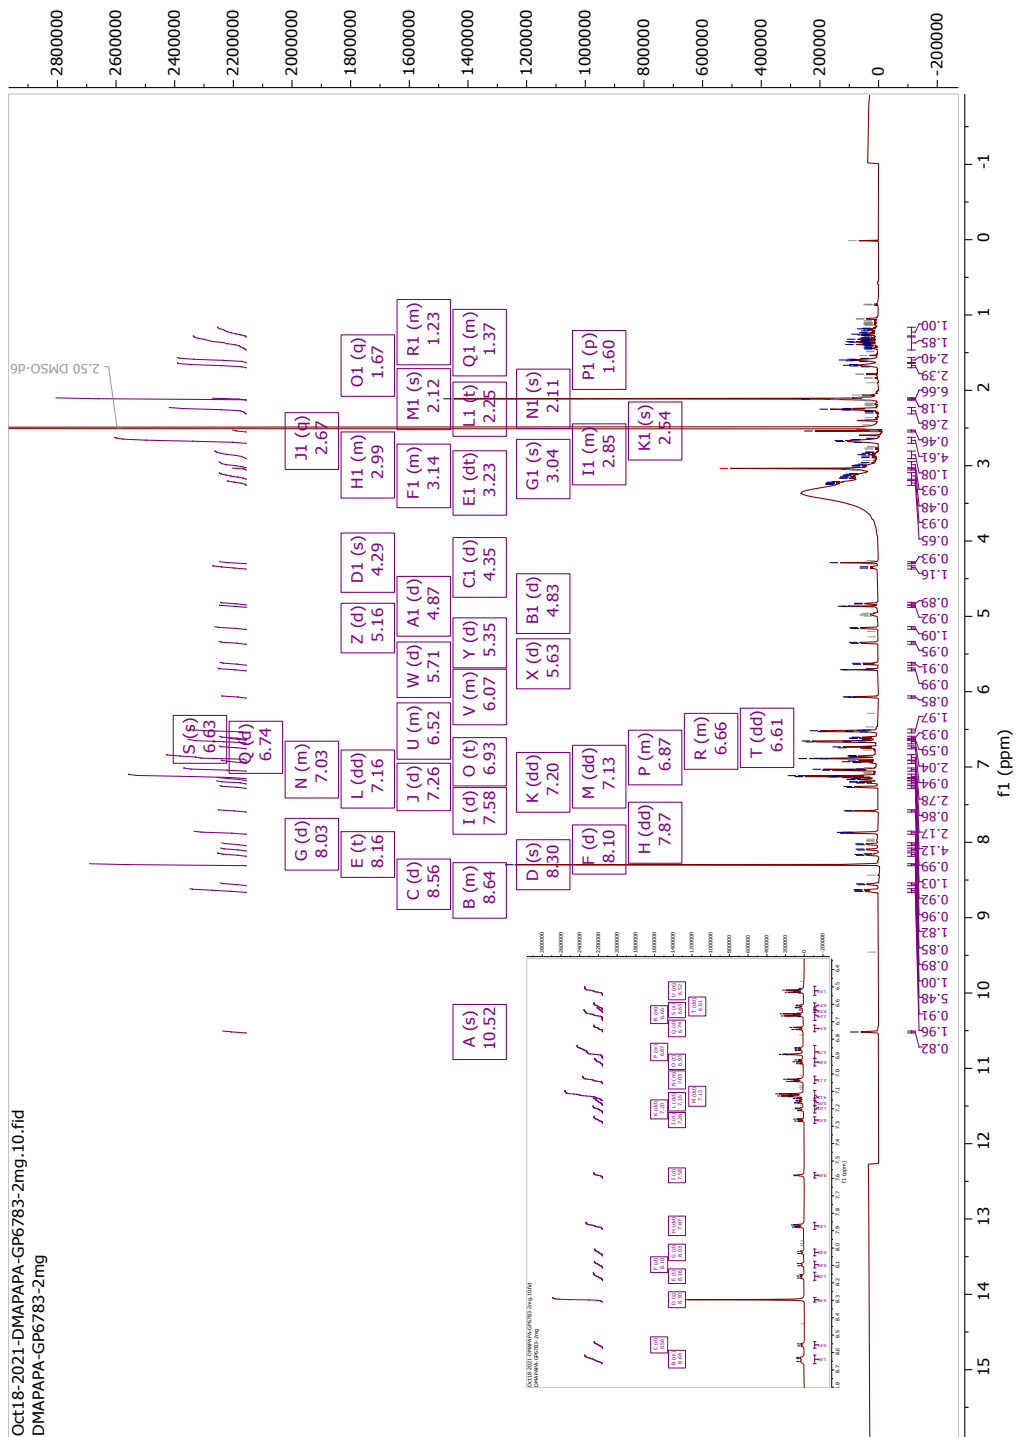

<sup>13</sup>C-NMR of compound **10**

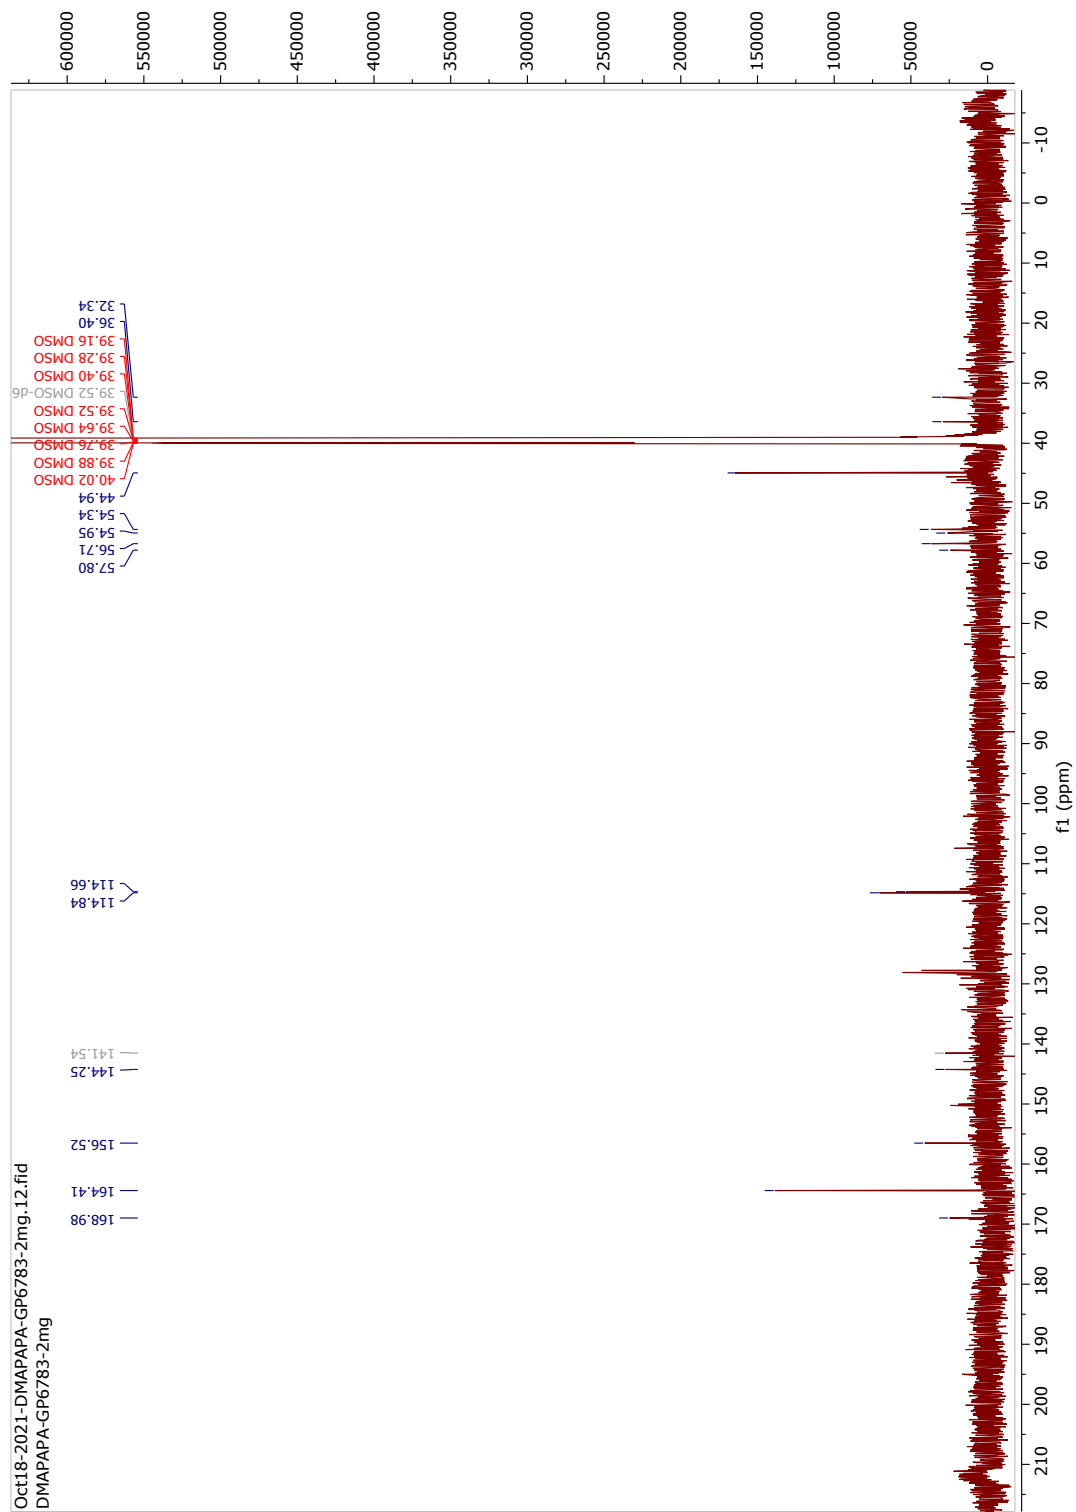

# Compound 11

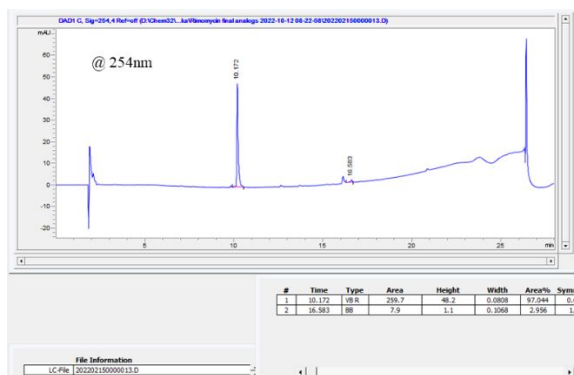

Compound 11

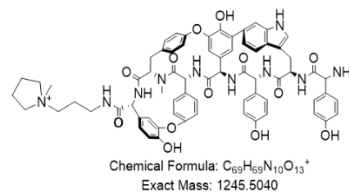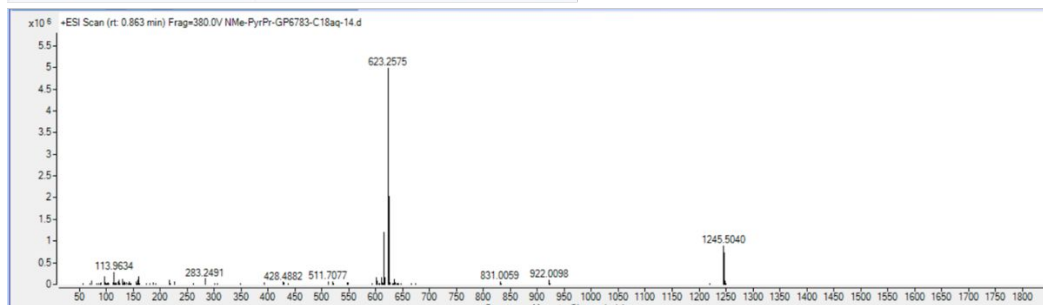

<sup>1</sup>H-NMR of compound 11

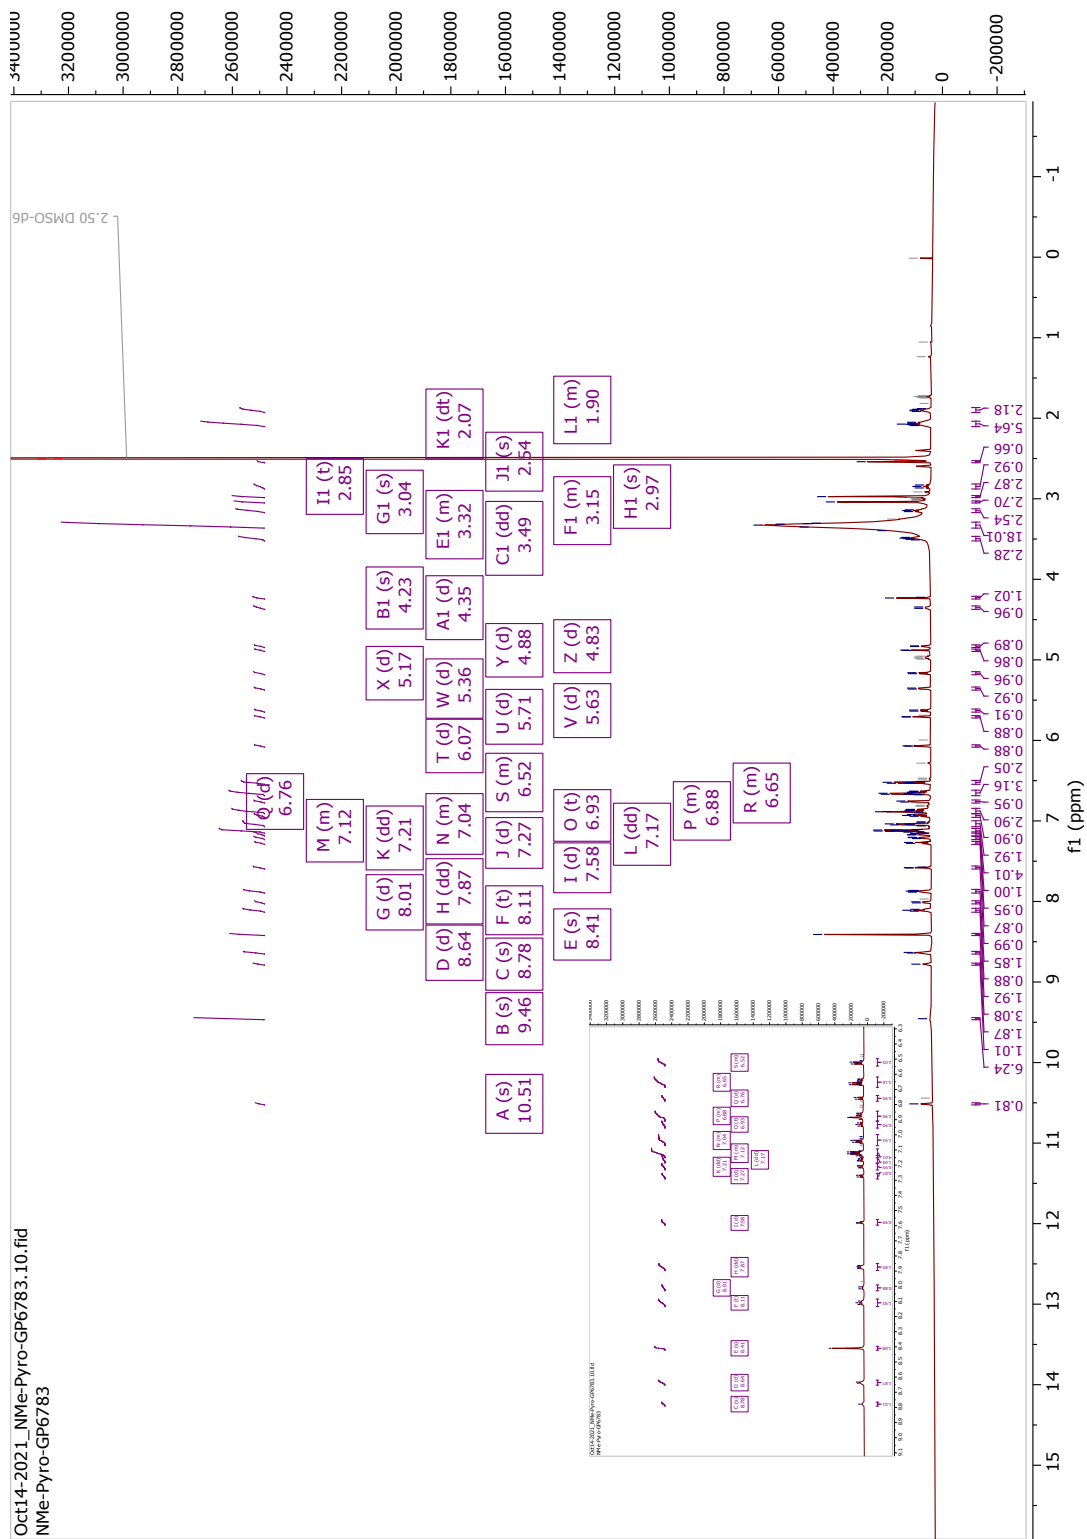

# $^{13}\text{C}$ -NMR of compound **11**

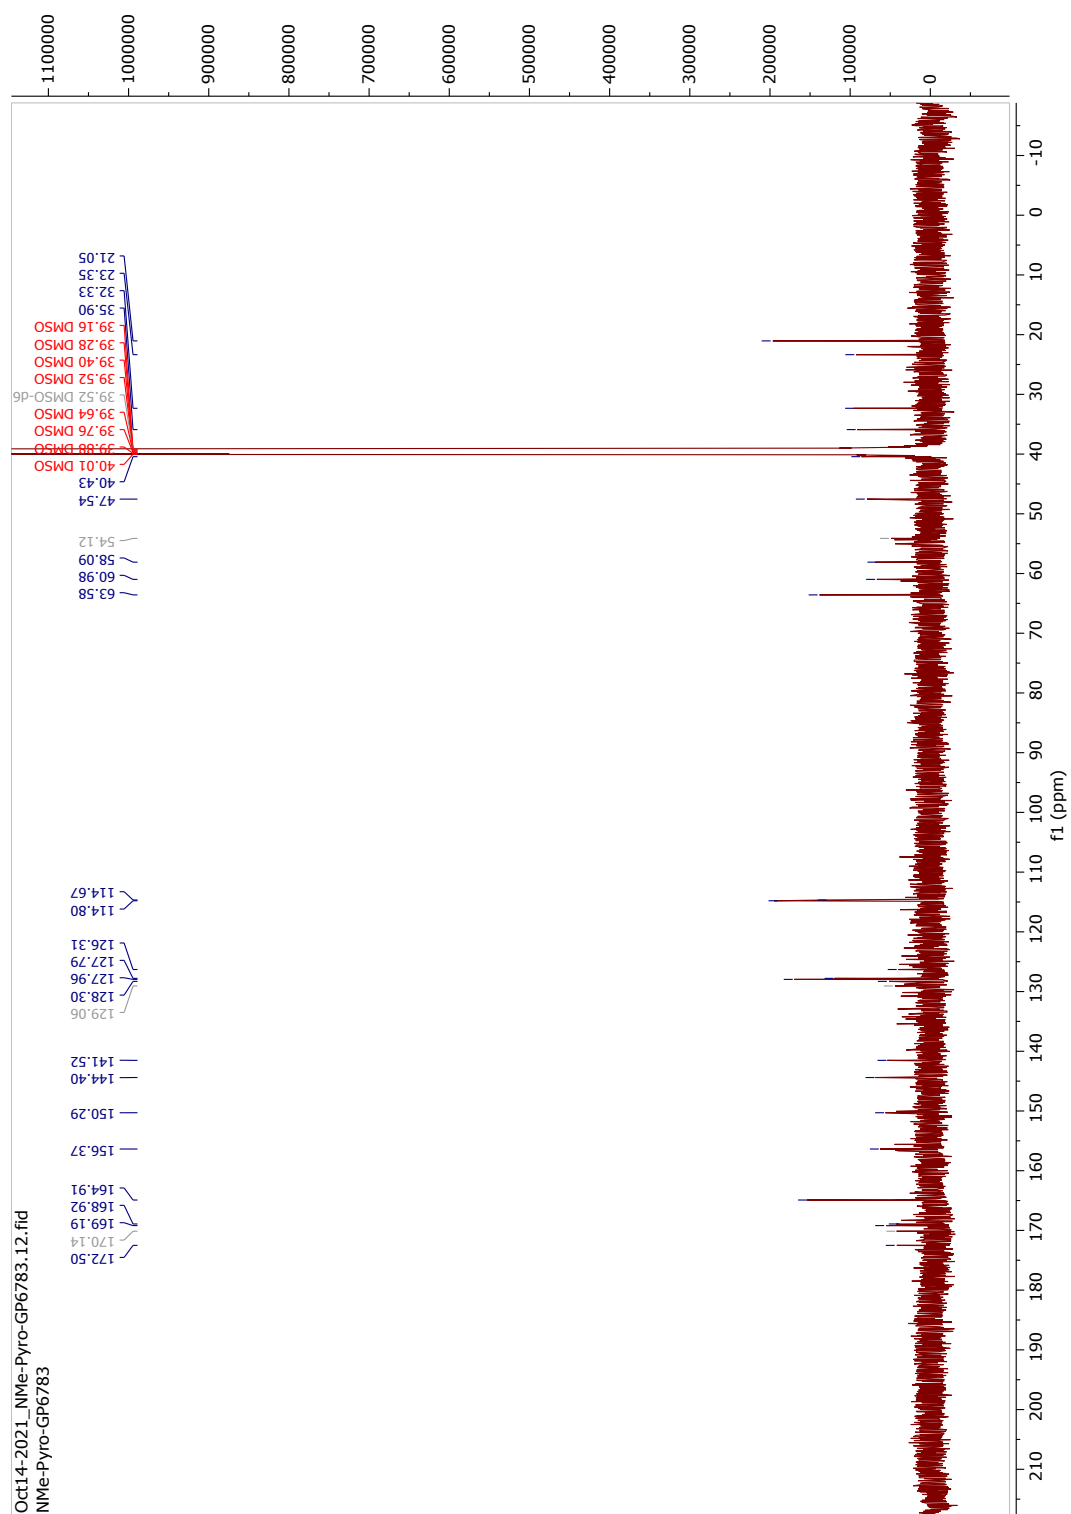





<sup>1</sup>H-NMR of compound 12

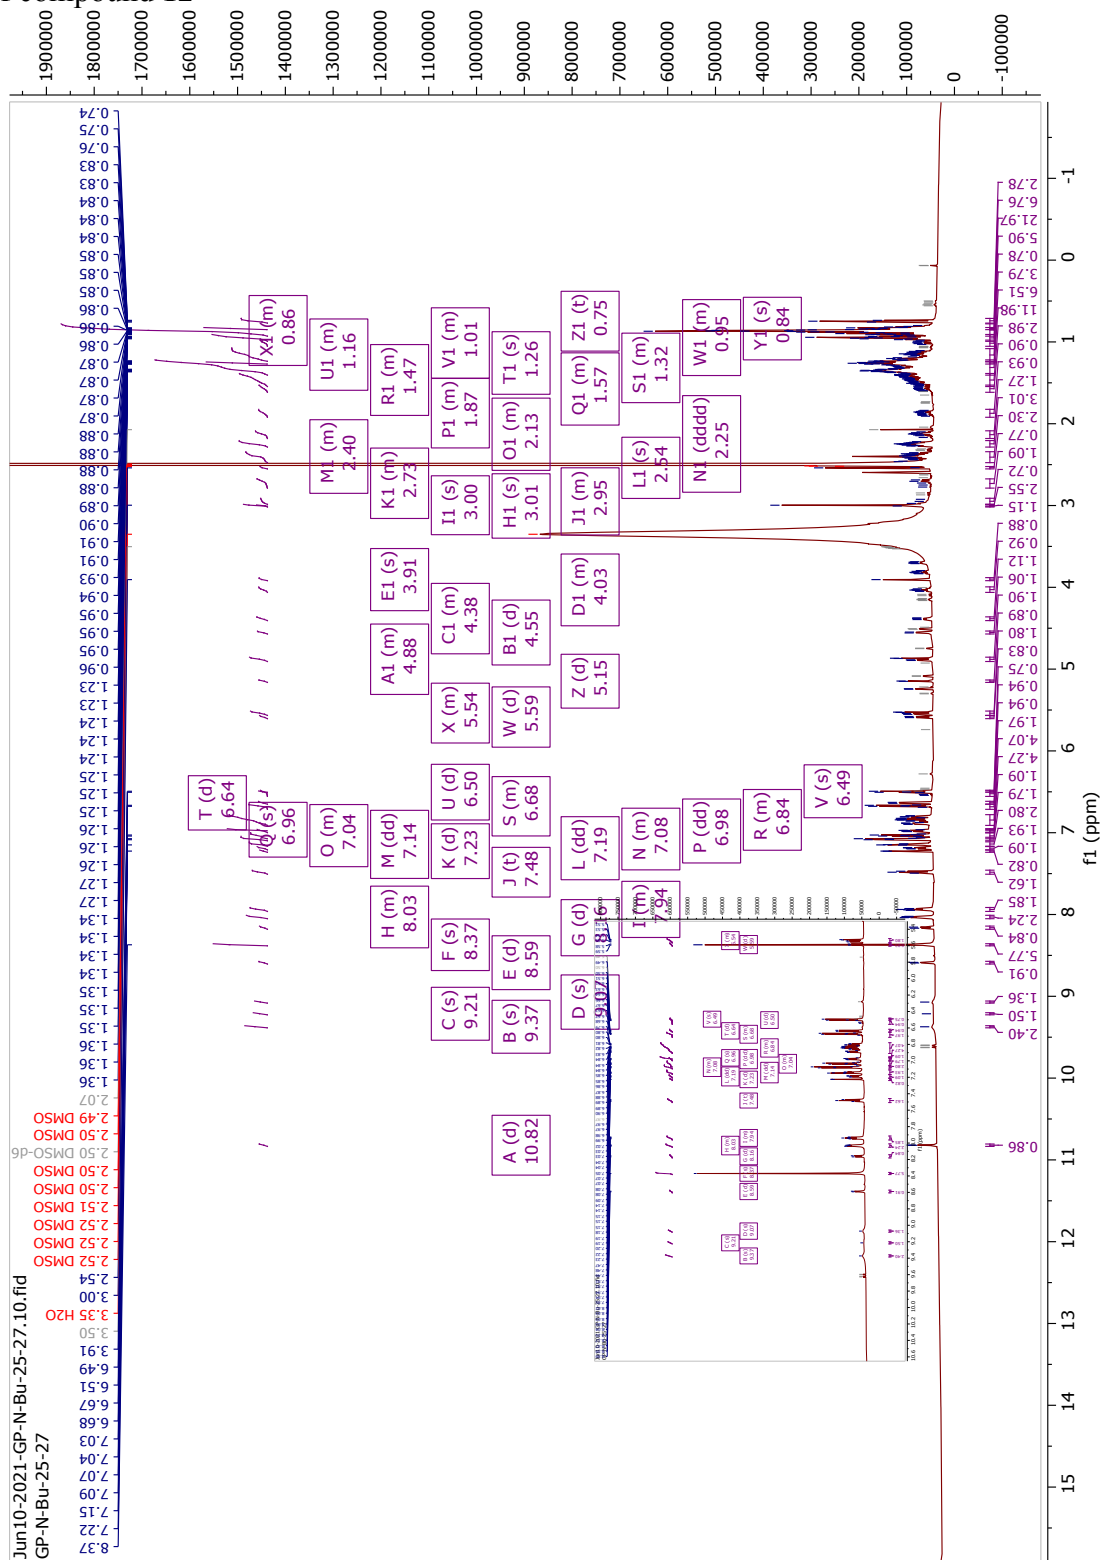

# $^{13}\text{C}$ -NMR of compound 12

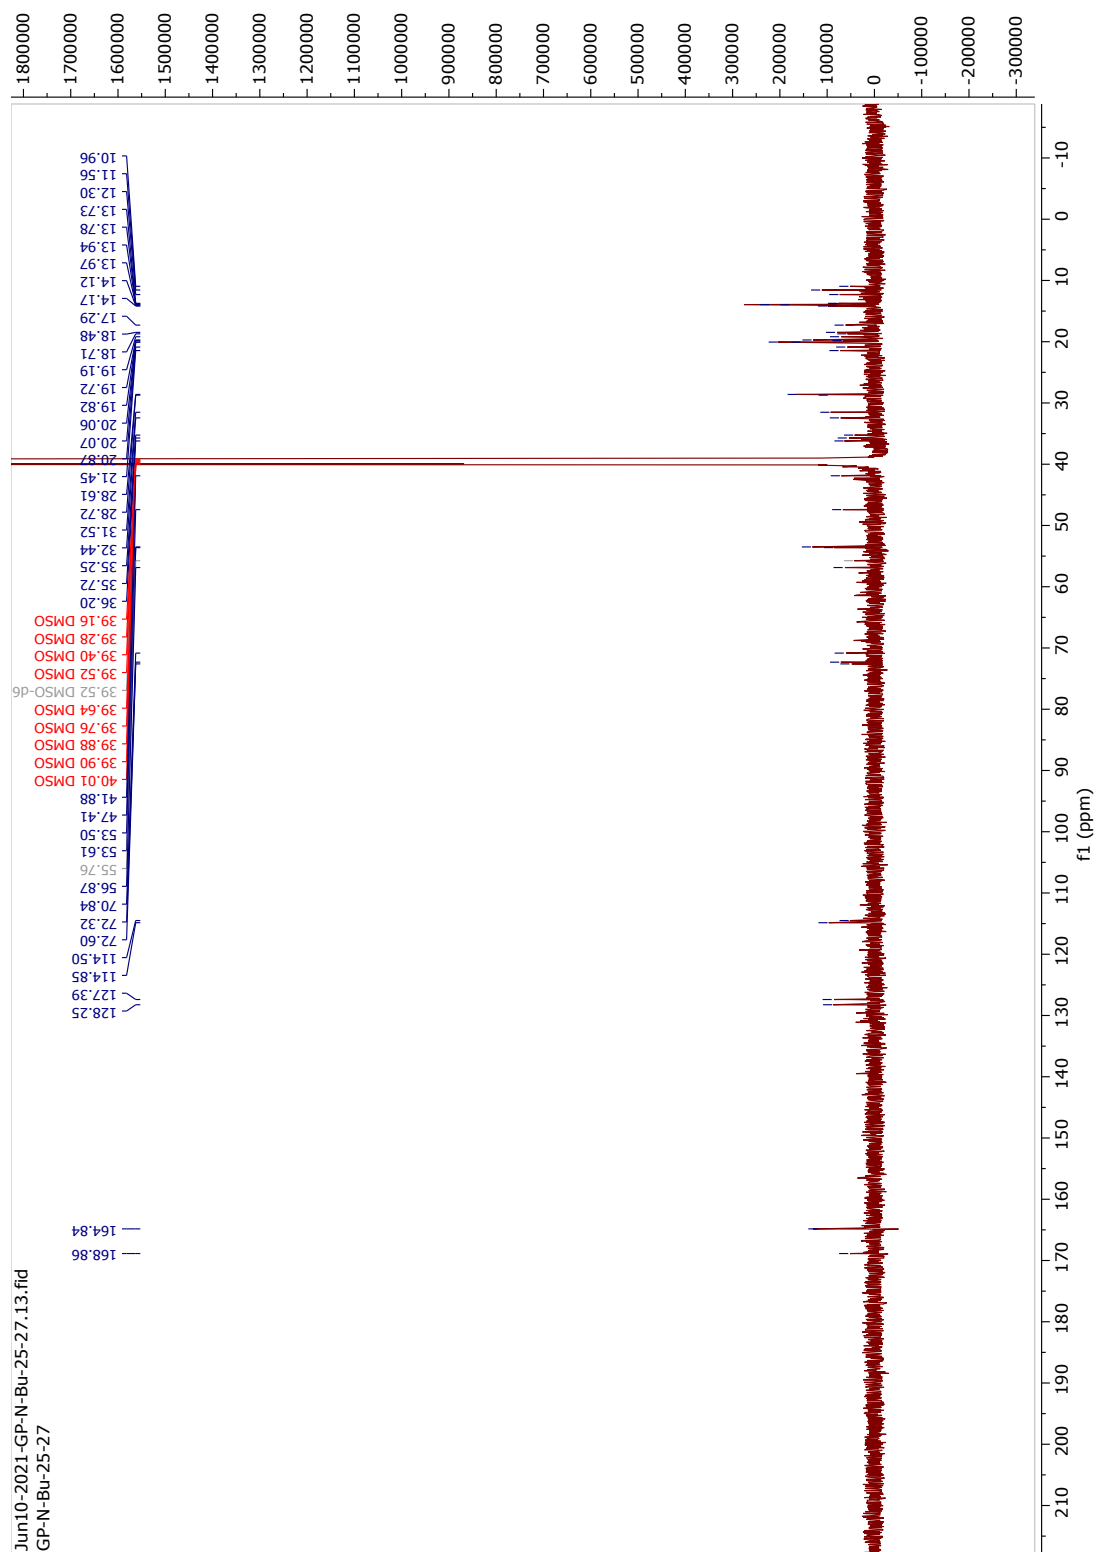

# Compound 13

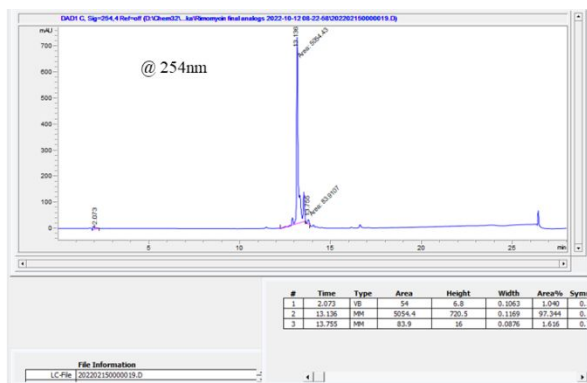

Compound 13

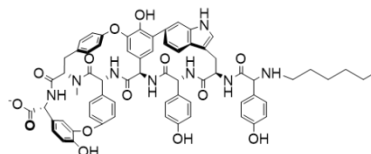

Chemical Formula:  $C_{67}H_{63}N_8O_{14}$   
Exact Mass: 1203.4469

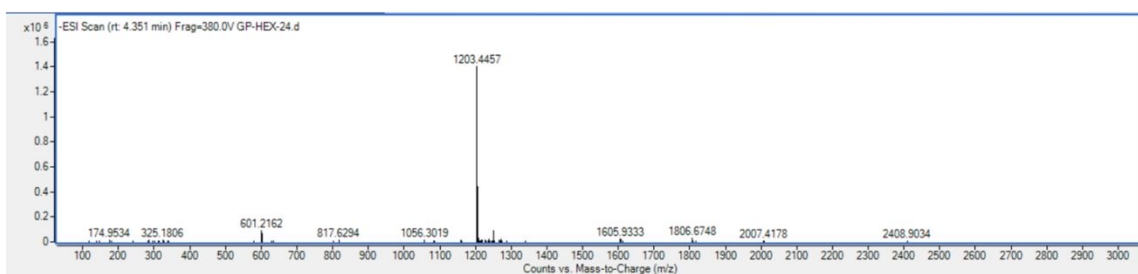

<sup>1</sup>H-NMR of compound **13**

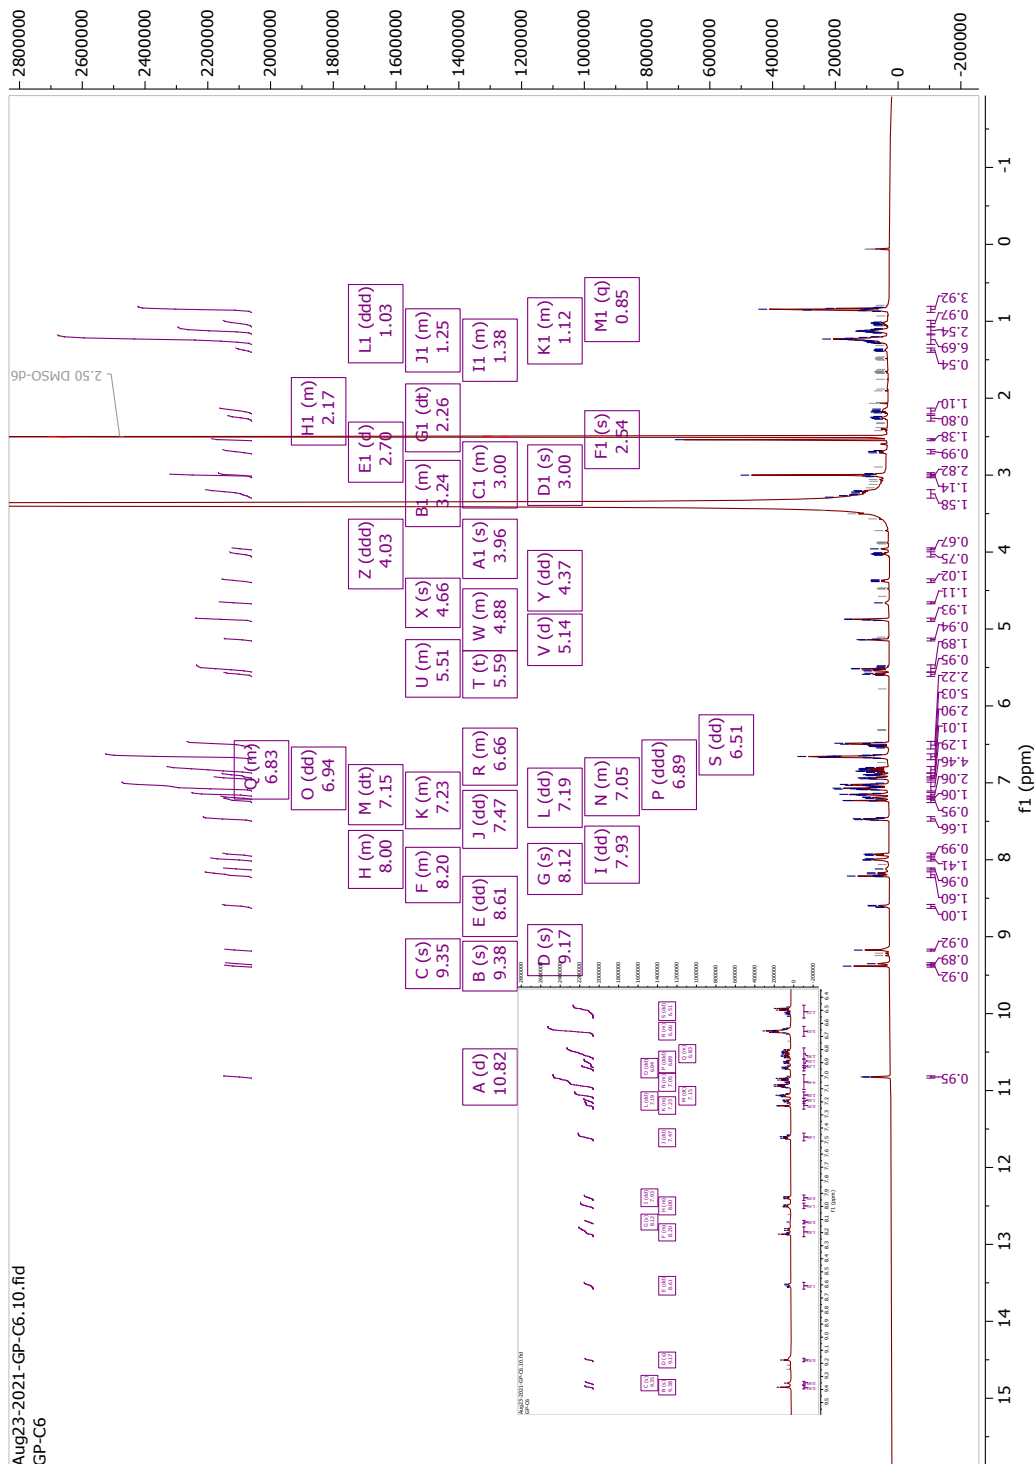

# <sup>13</sup>C-NMR of compound 13

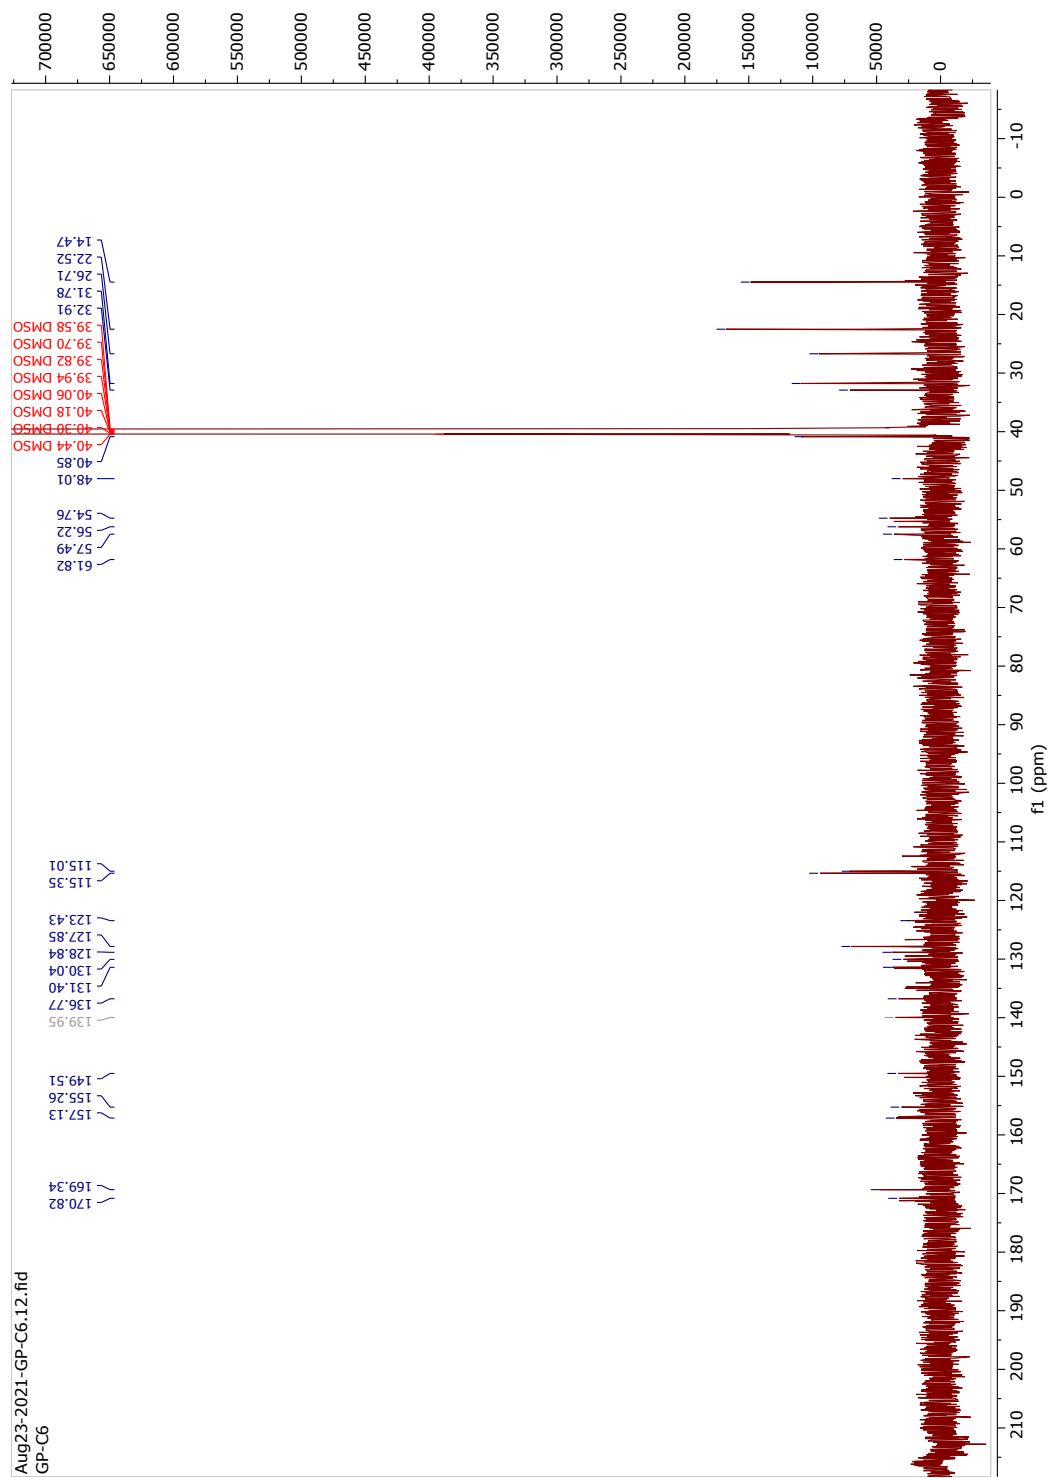

# Compound 14

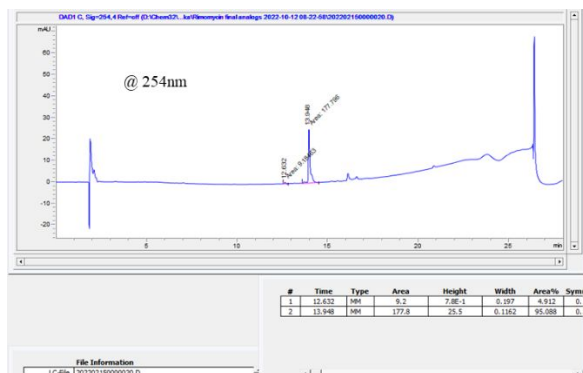

Compound 14

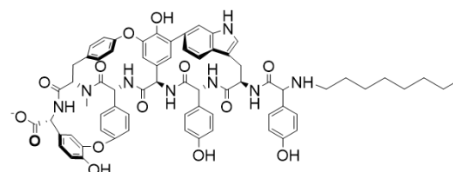

Chemical Formula:  $C_{60}H_{67}N_9O_{14}$   
Exact Mass: 1231.4782

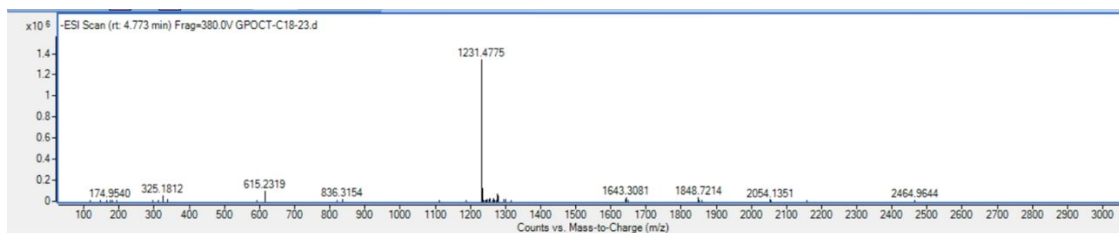

<sup>1</sup>H-NMR of compound 14

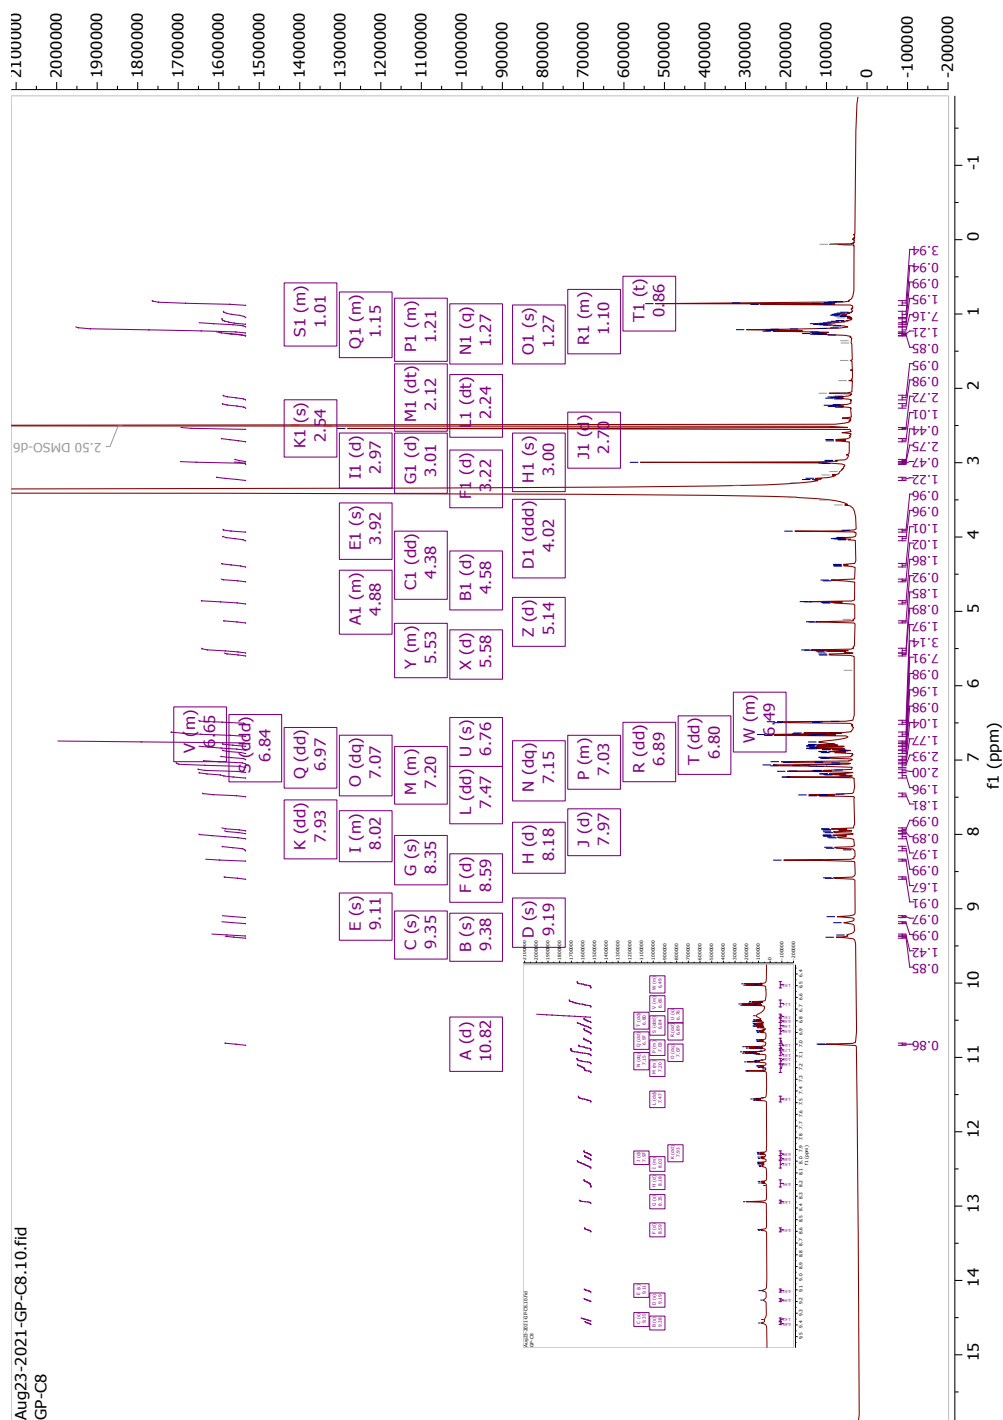

# $^{13}\text{C}$ -NMR of compound 14

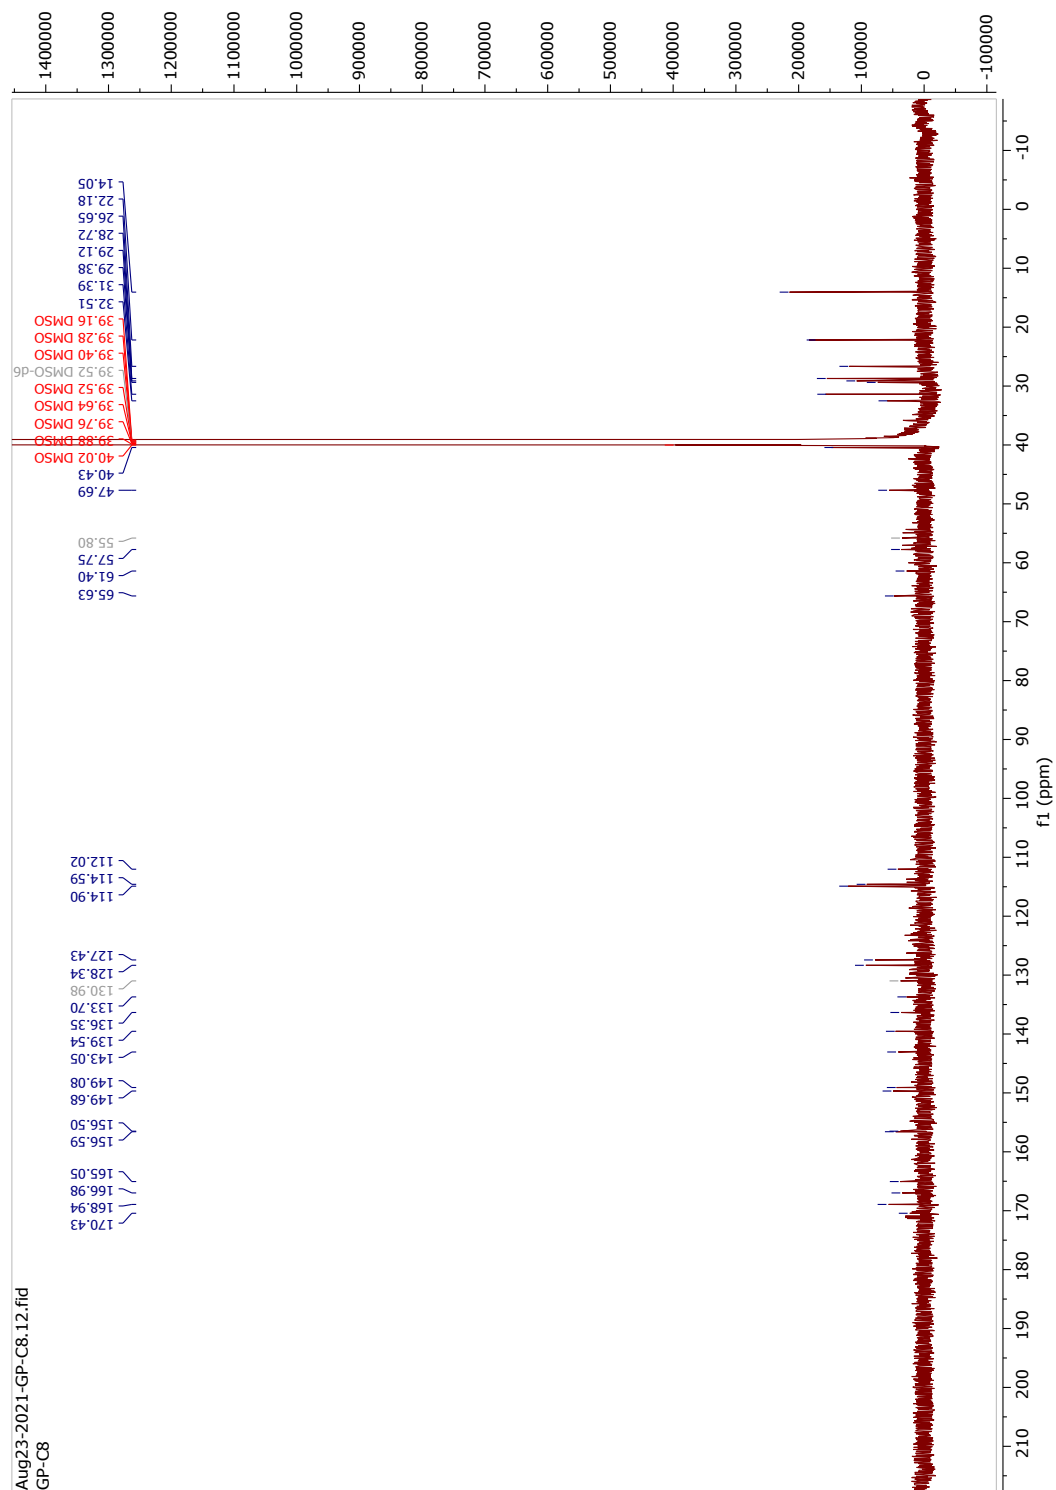



# Compound 15

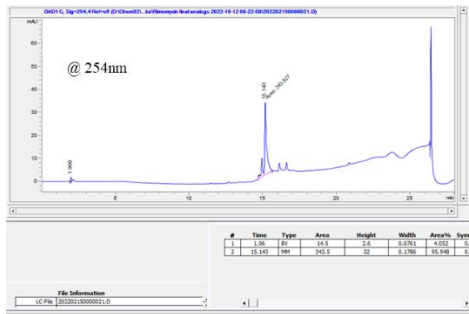

Compound 15

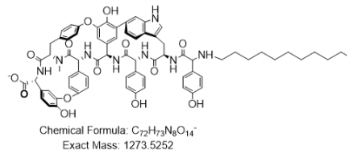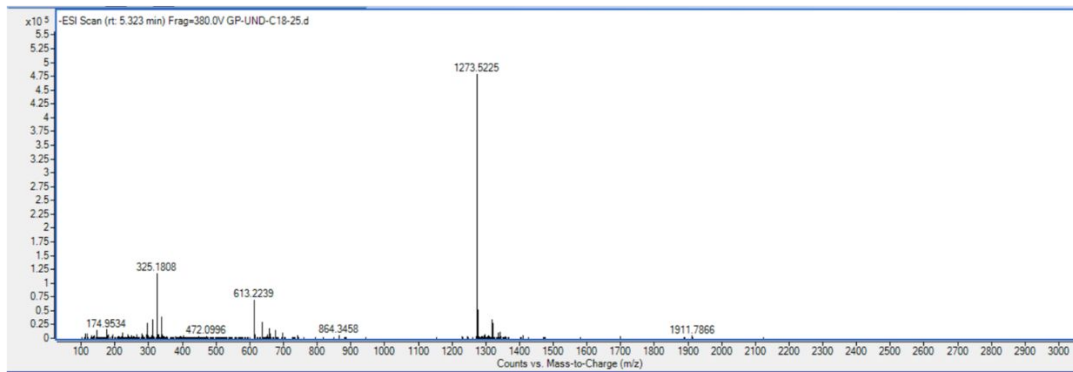

<sup>1</sup>H-NMR of compound 15

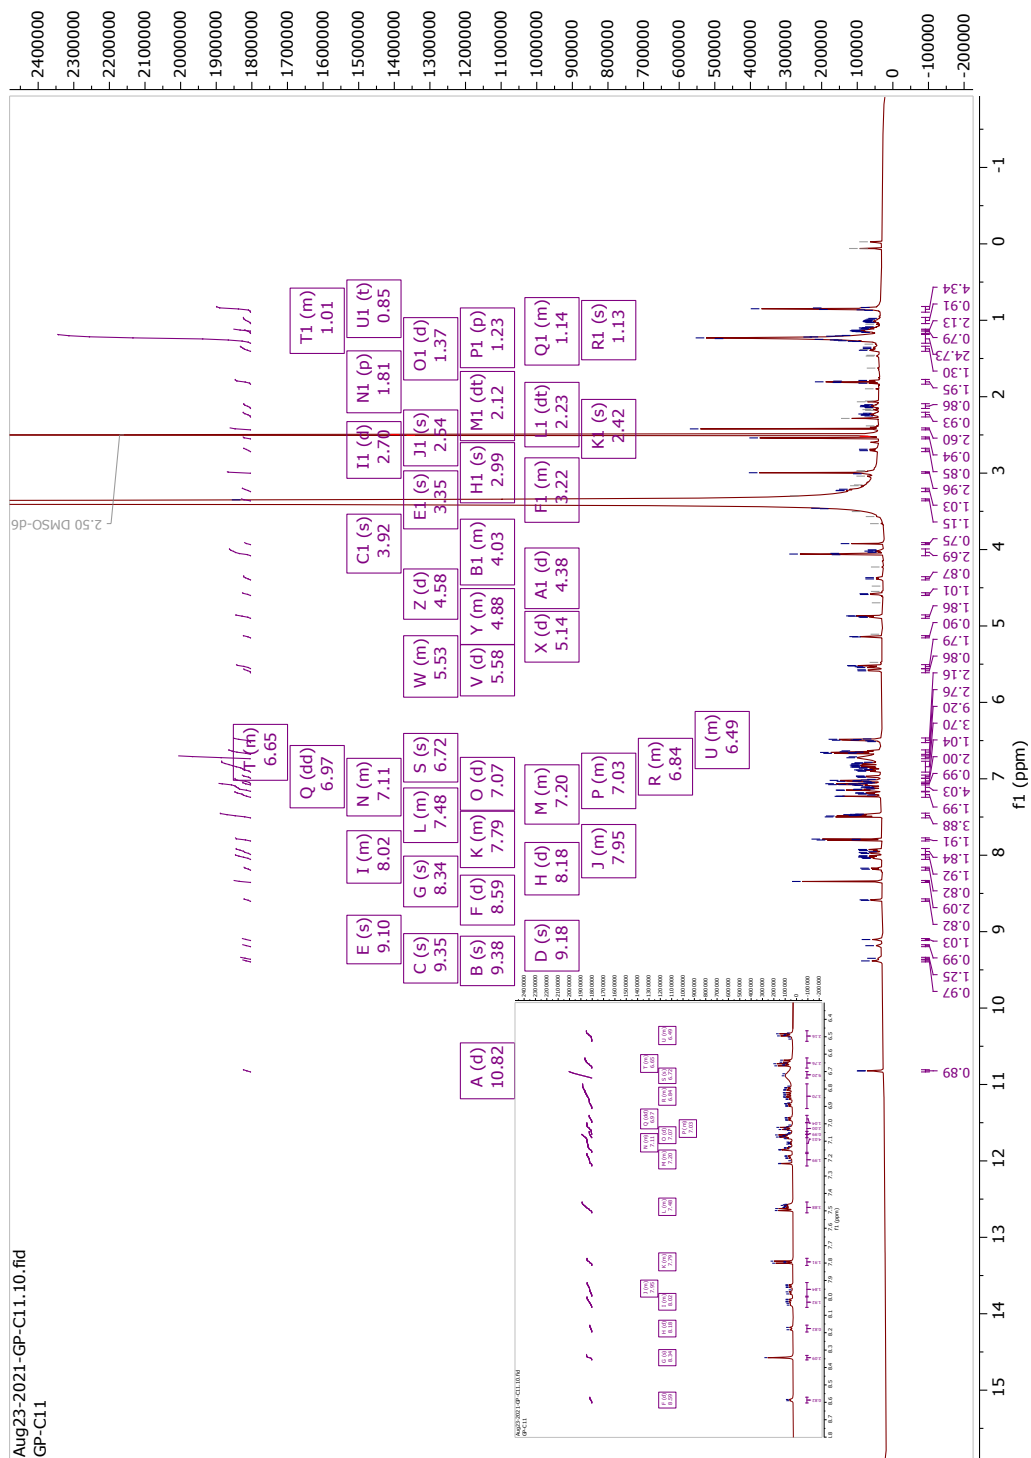

<sup>13</sup>C-NMR of compound 15

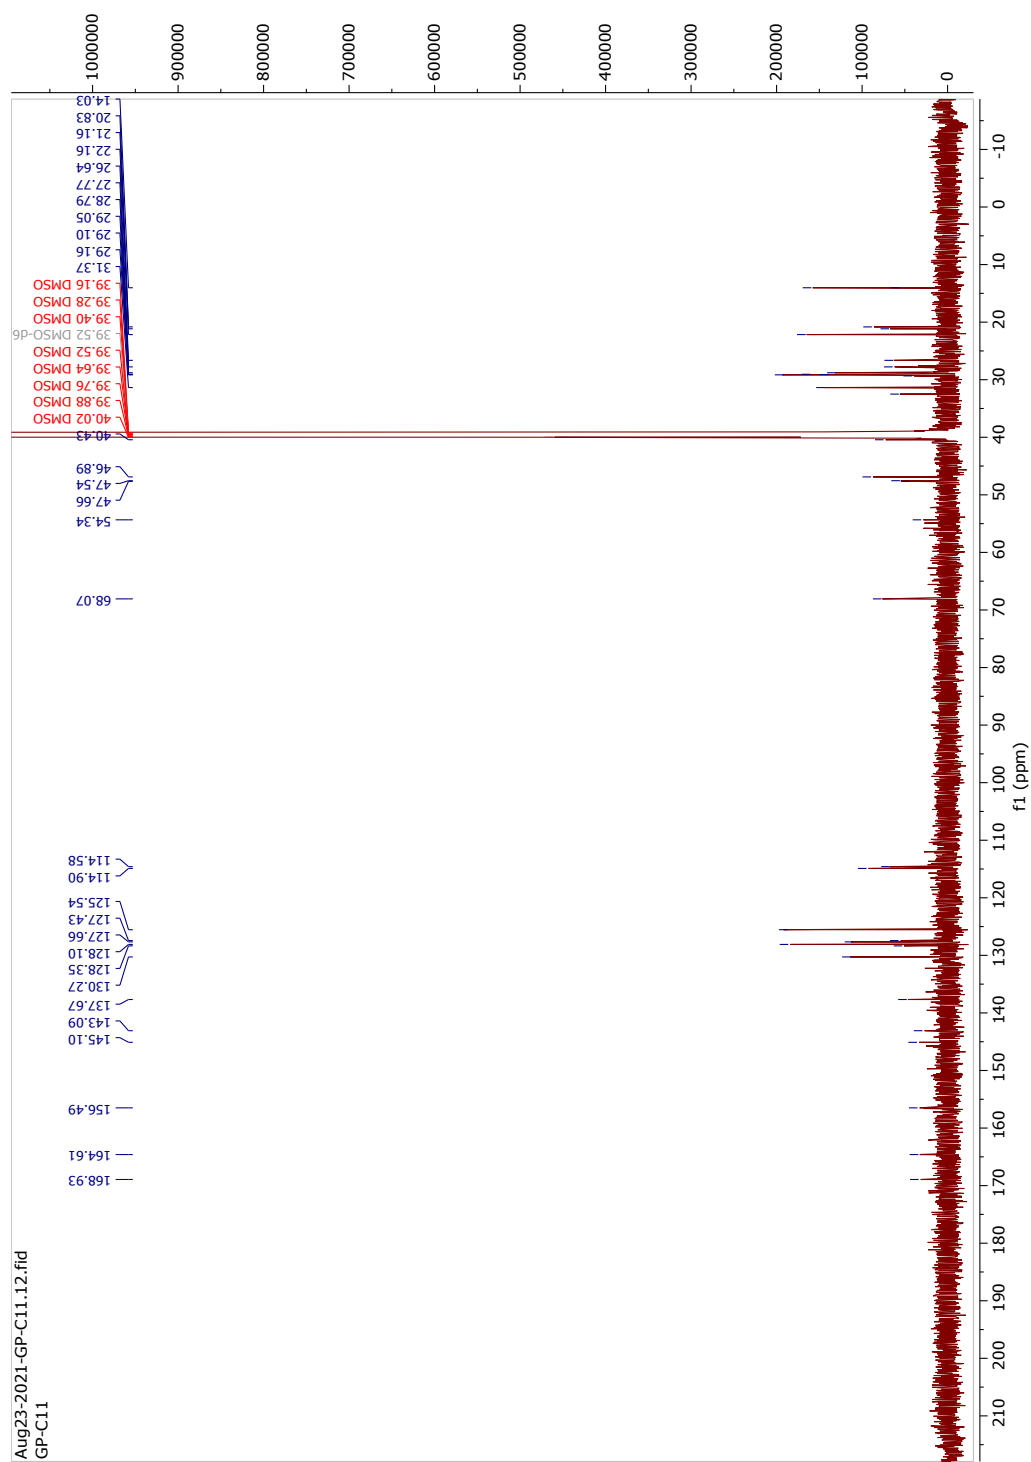

# Compound 16

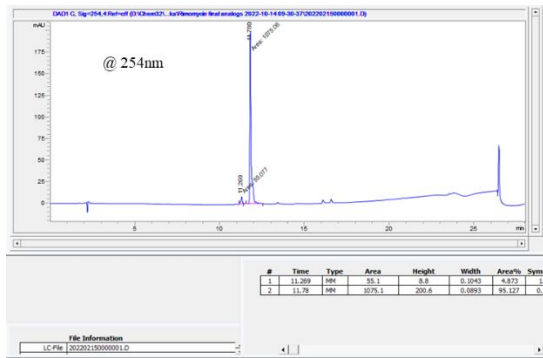

Compound 16

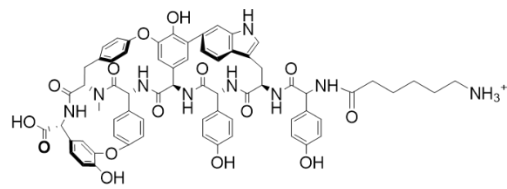

Chemical Formula:  $C_{67}H_{64}N_9O_{15}^+$   
Exact Mass: 1234.4516

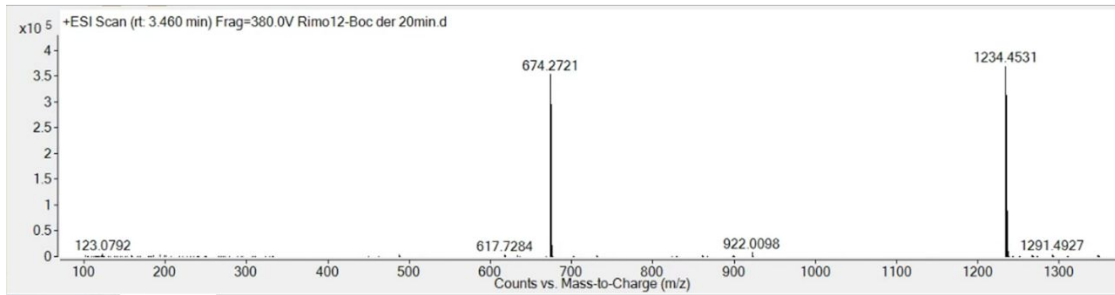

# <sup>1</sup>H-NMR of compound 16

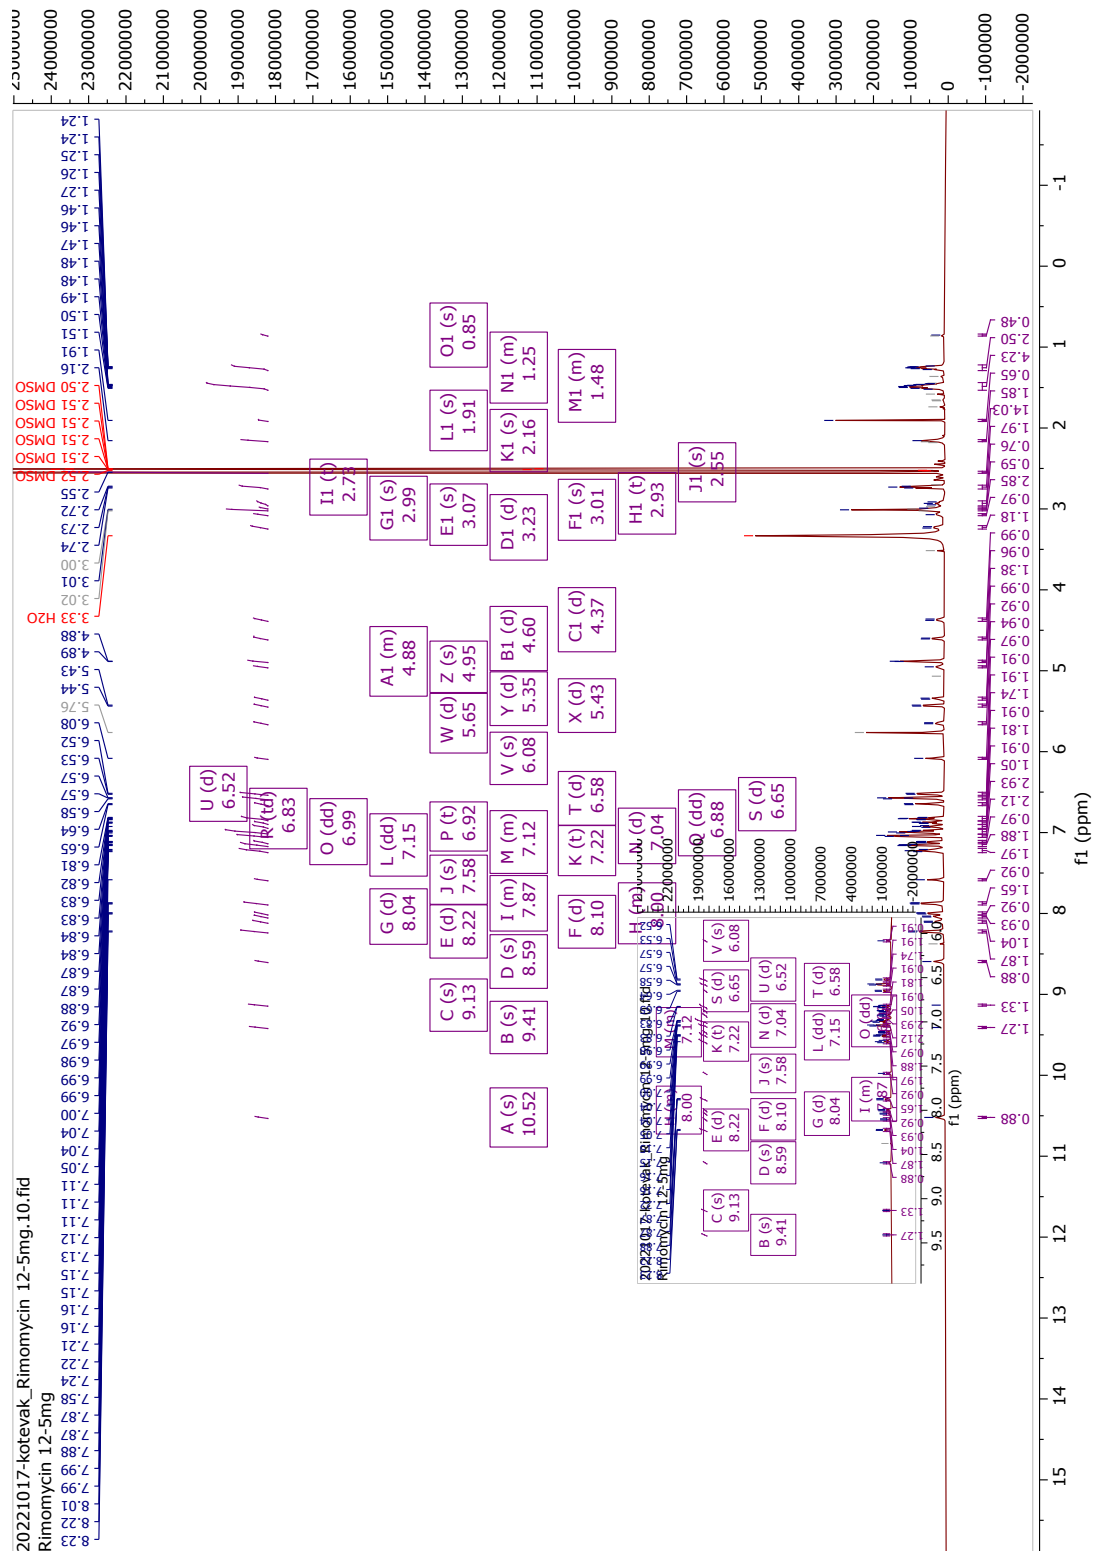

# <sup>13</sup>C-NMR of compound 16

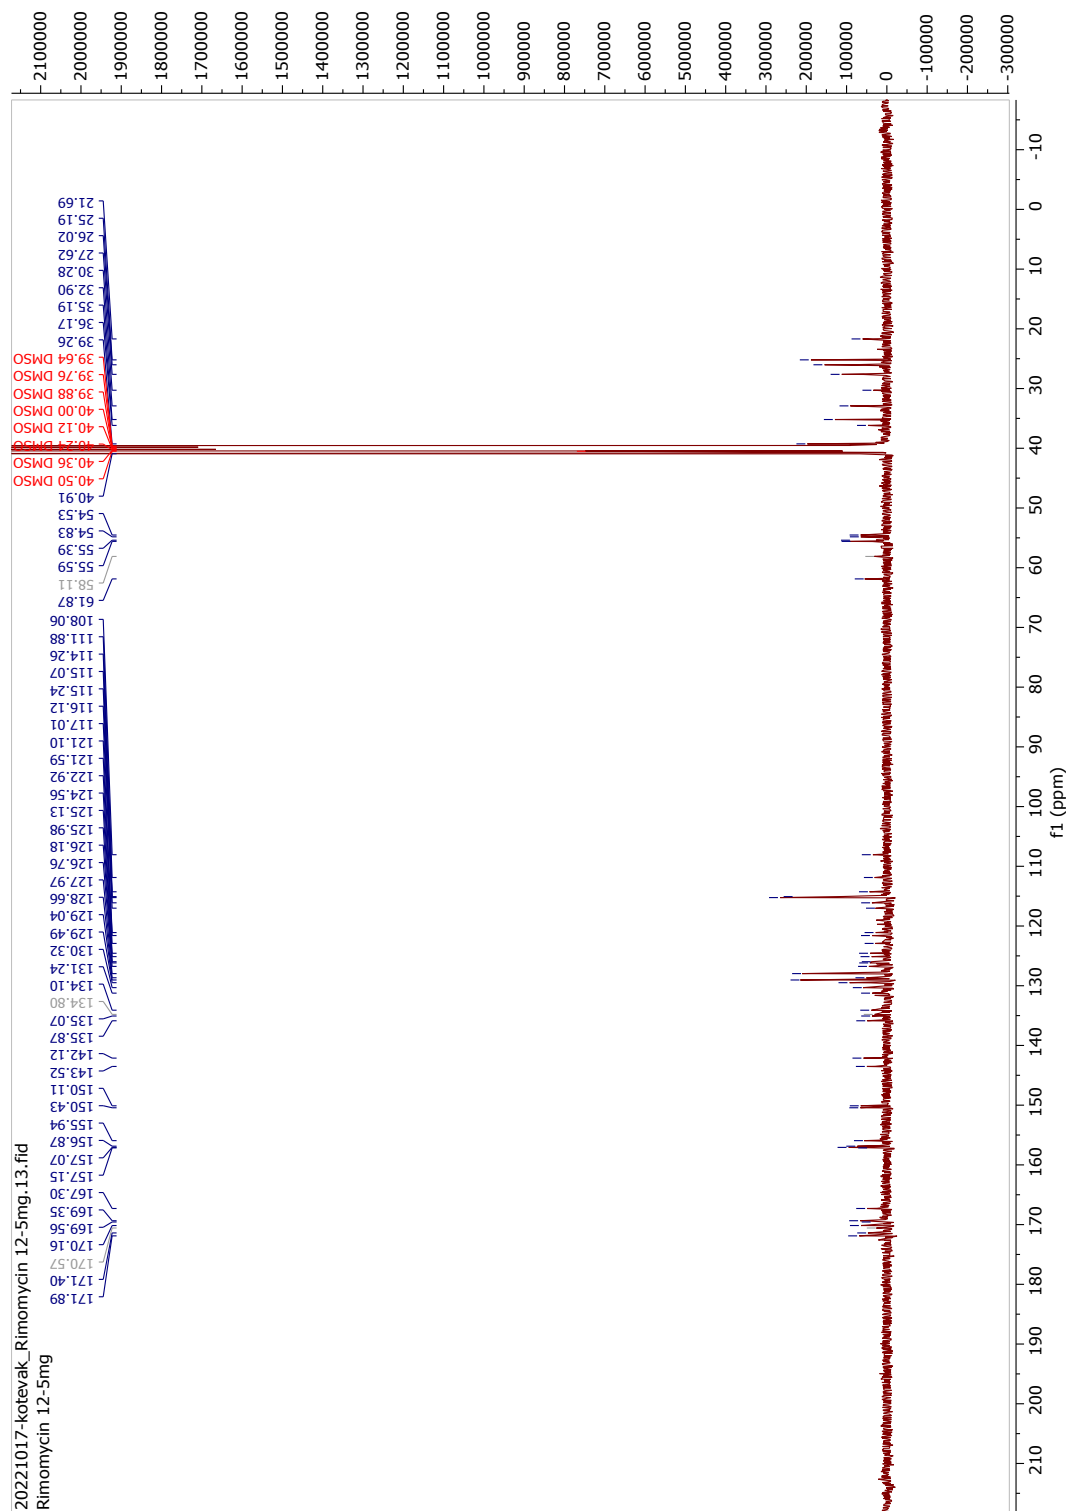

# Compound 17

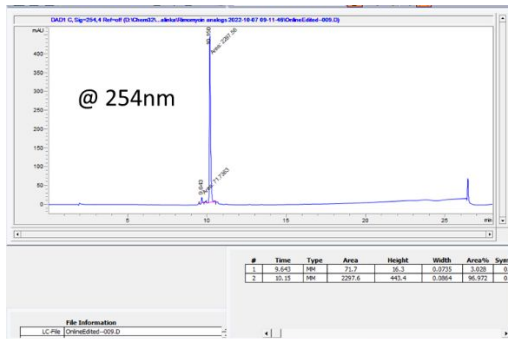

Compound 17

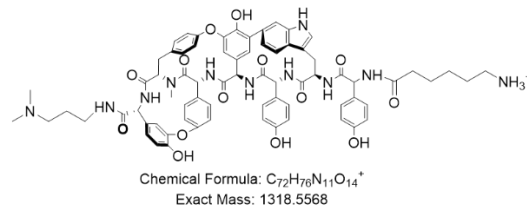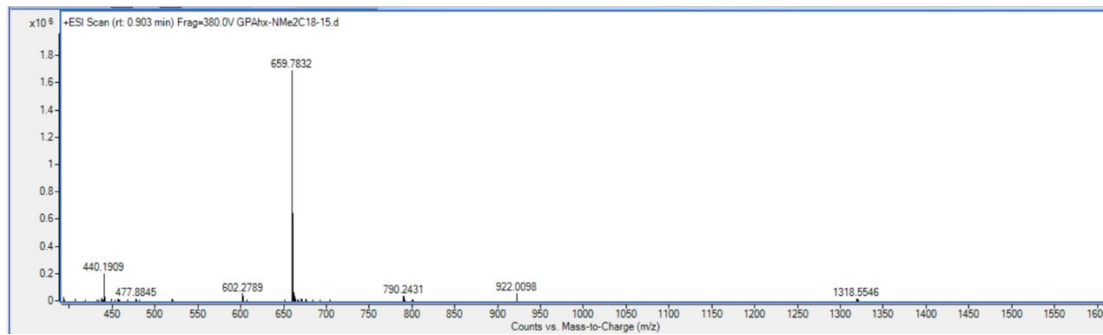

<sup>1</sup>H-NMR of compound 17

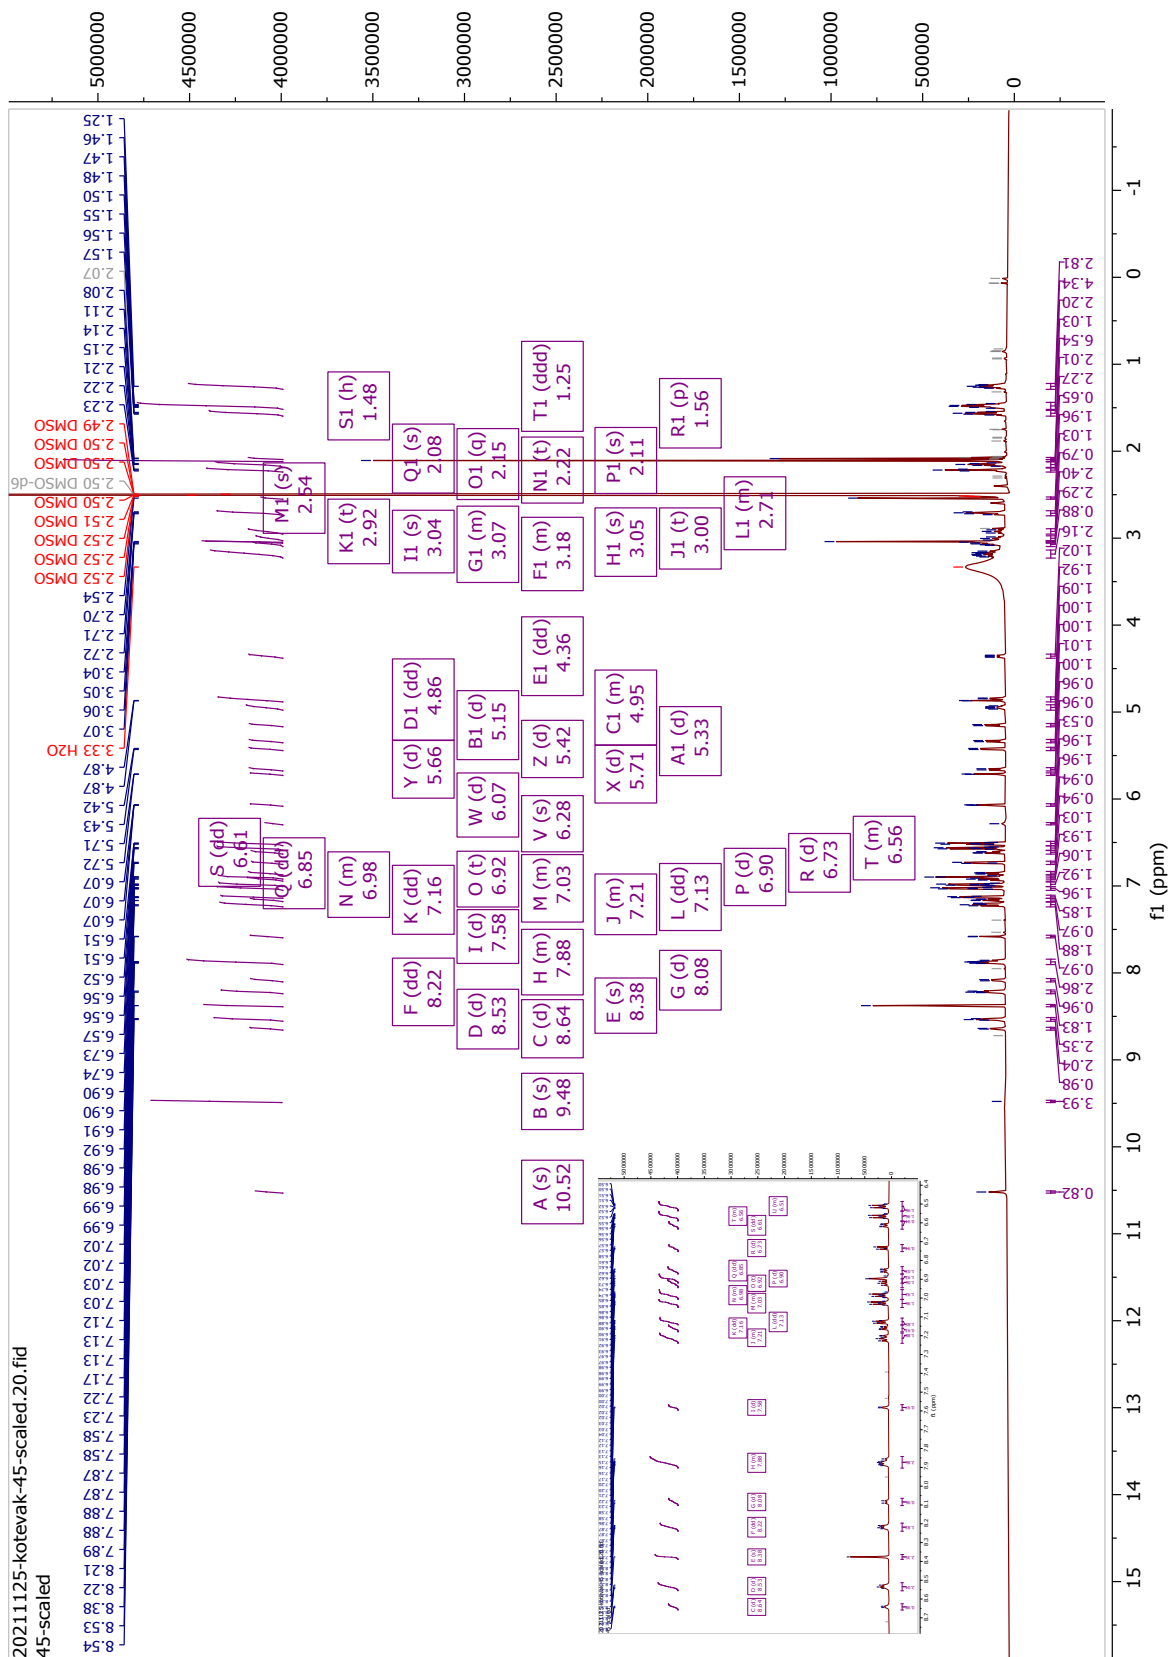



# $^{13}\text{C}$ -NMR of compound 17

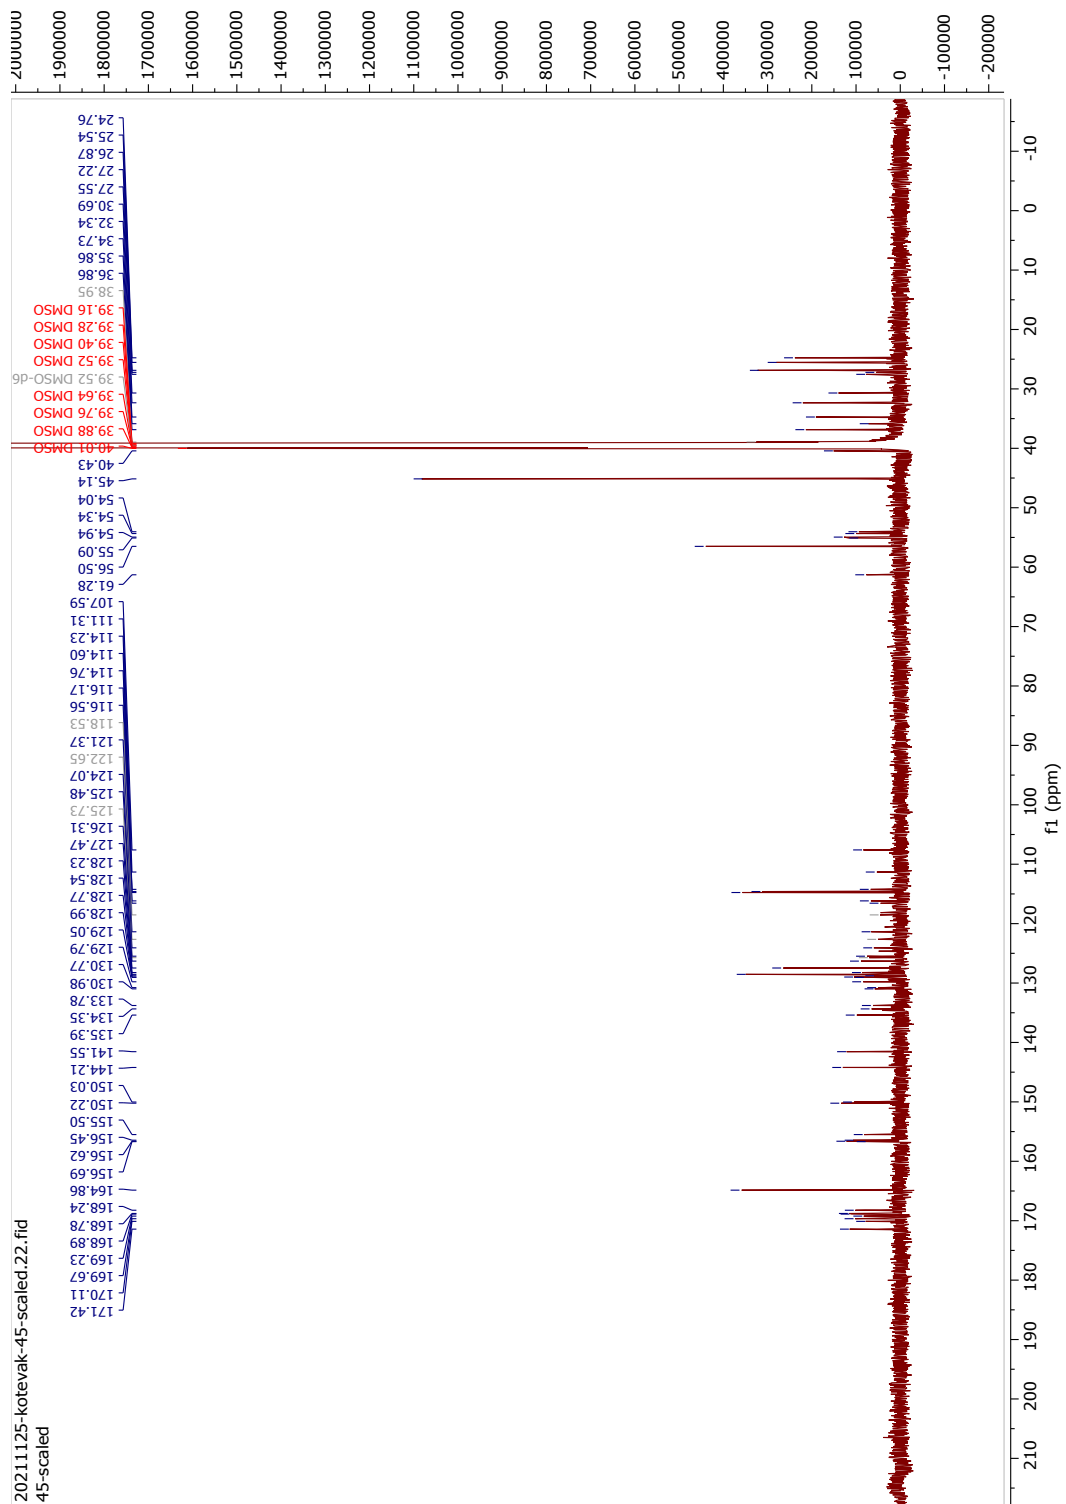

# Compound 18

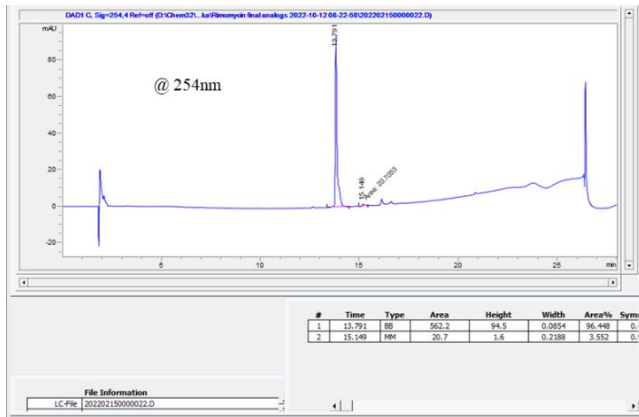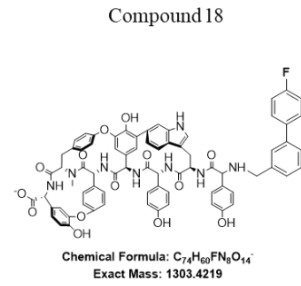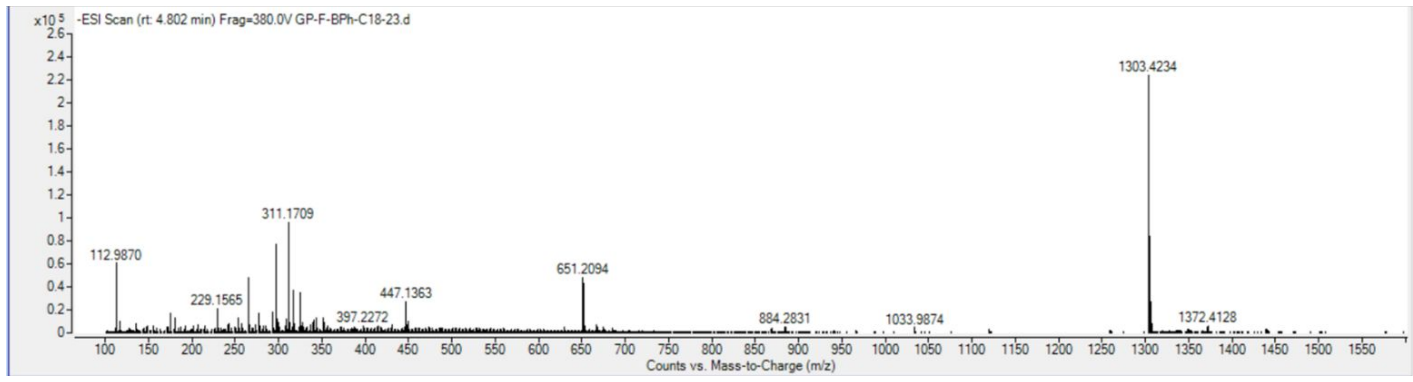

<sup>1</sup>H-NMR of compound 18

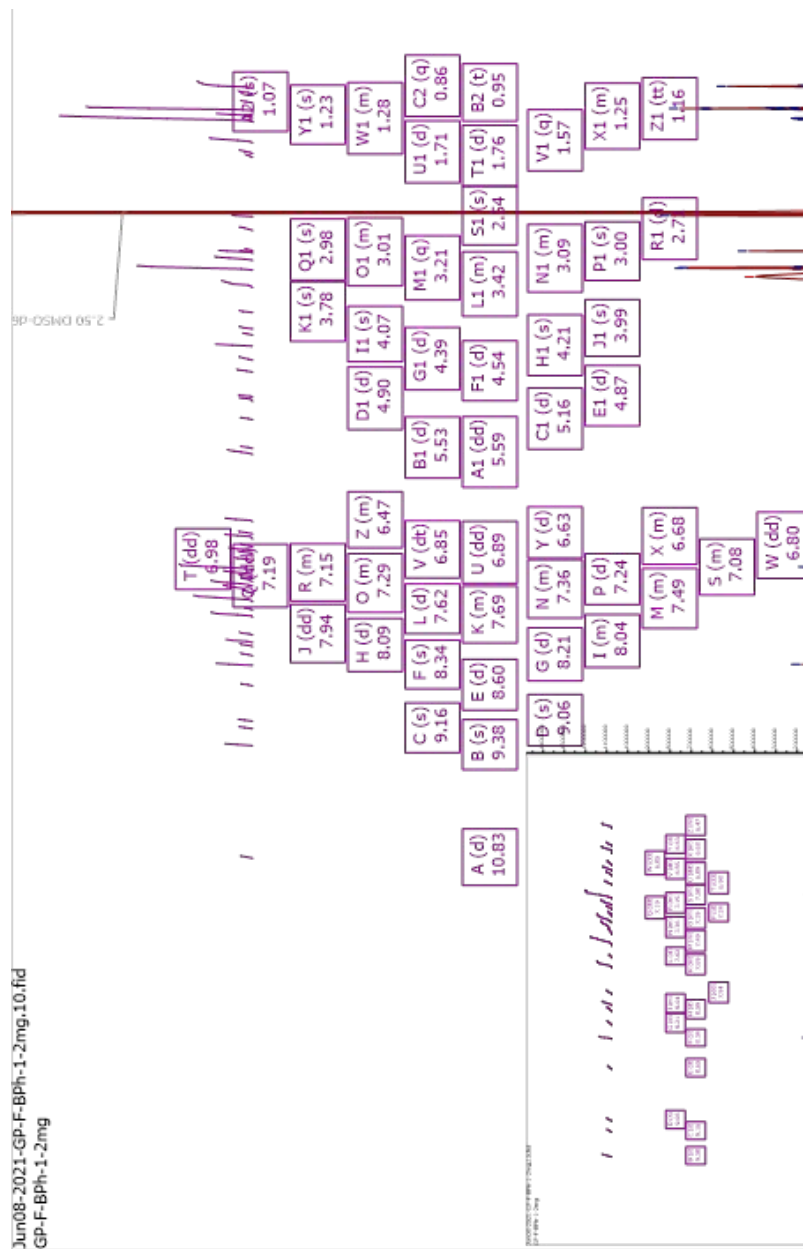

<sup>13</sup>C-NMR of compound 18

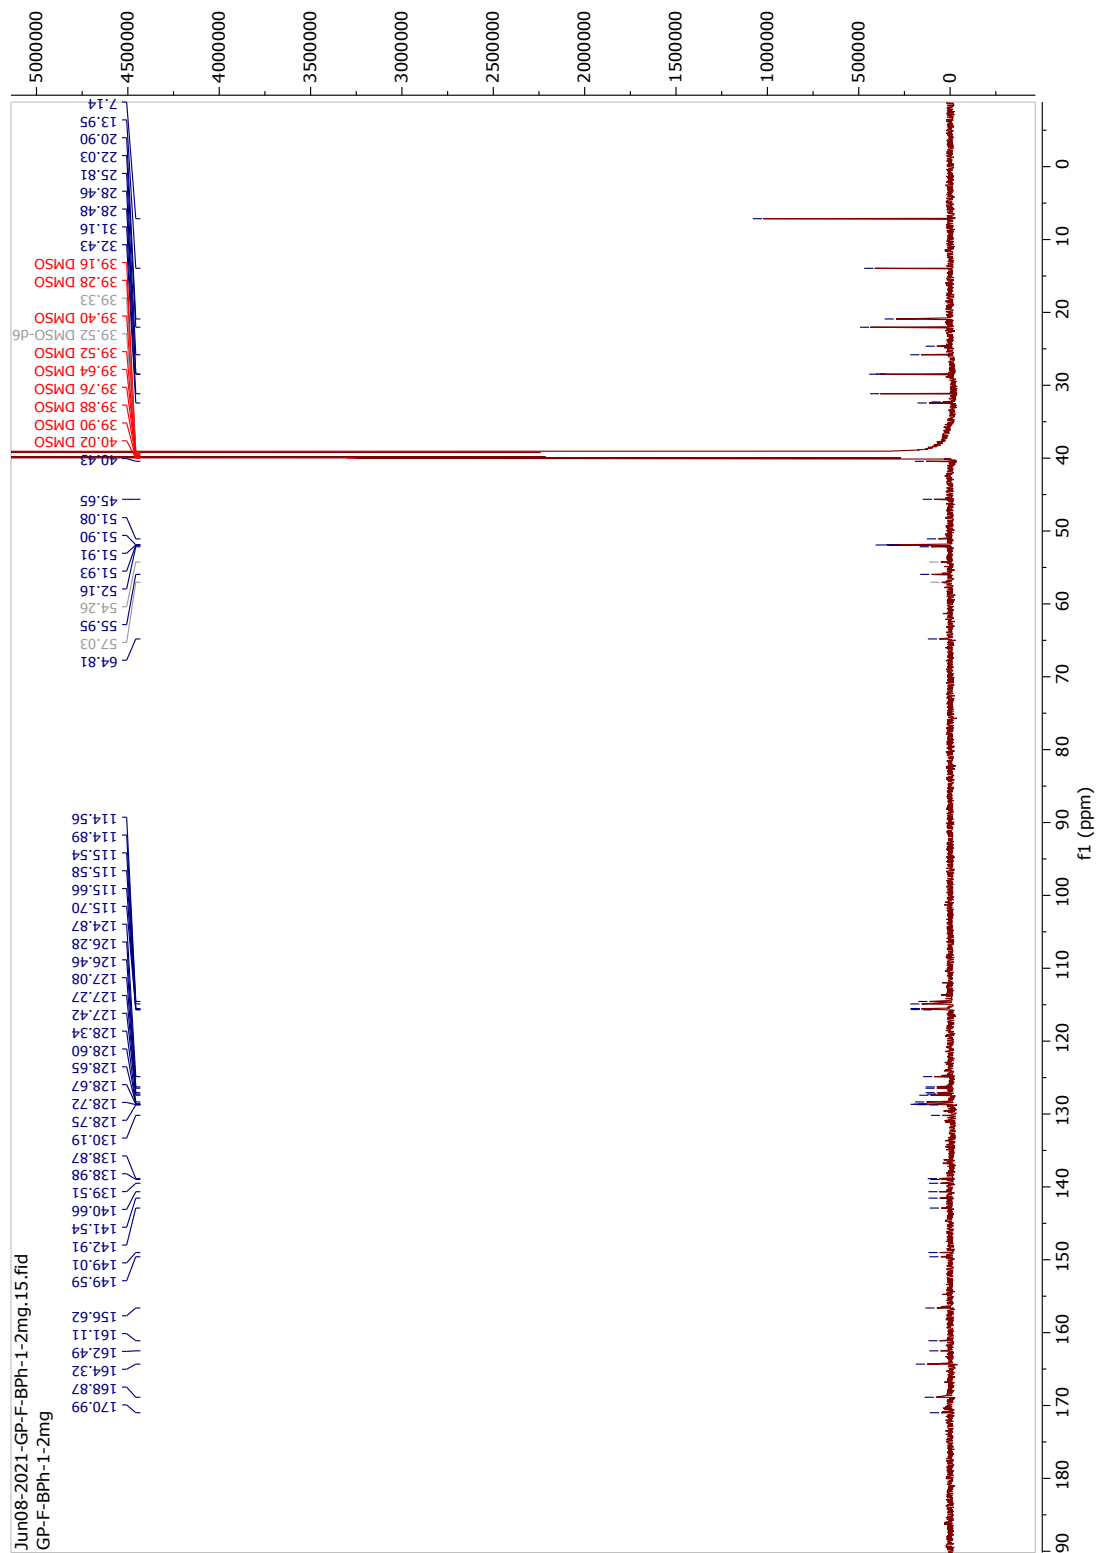

## Compound 19

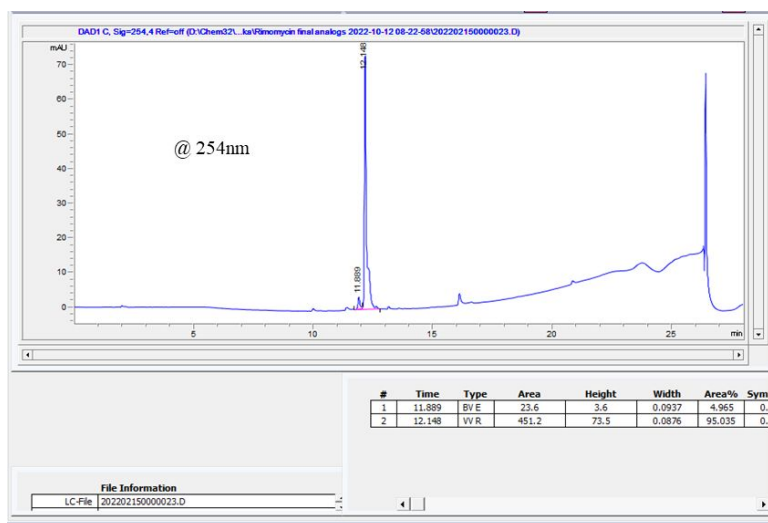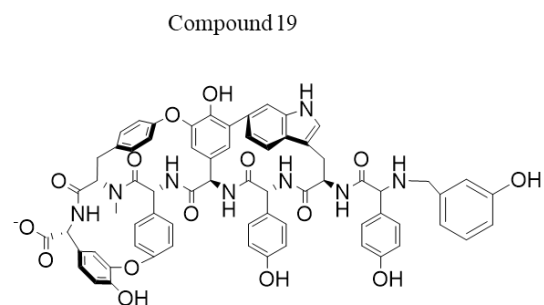

Chemical Formula:  $C_{68}H_{57}N_8O_{15}$   
Exact Mass: 1225.3949

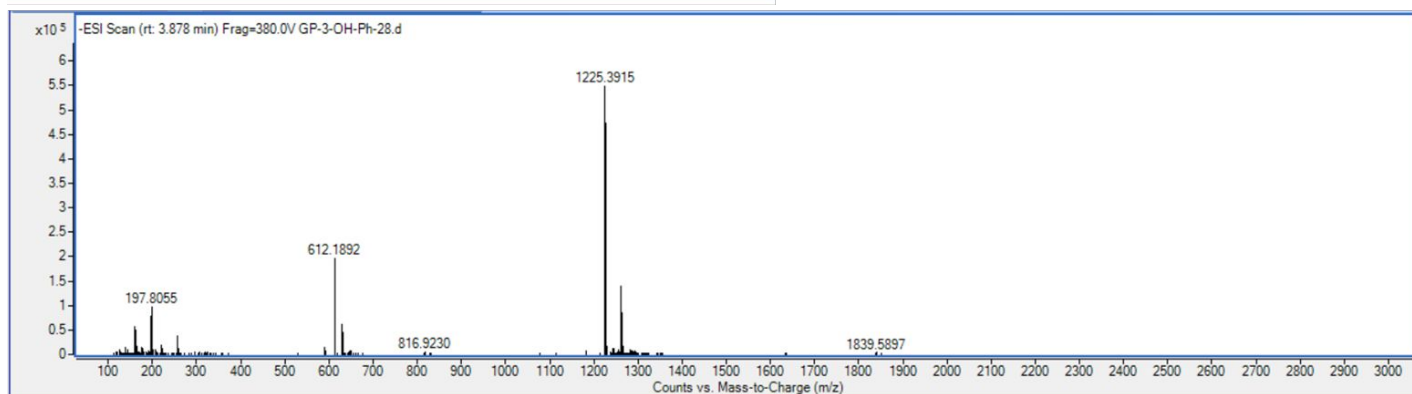

<sup>1</sup>H-NMR of compound 19

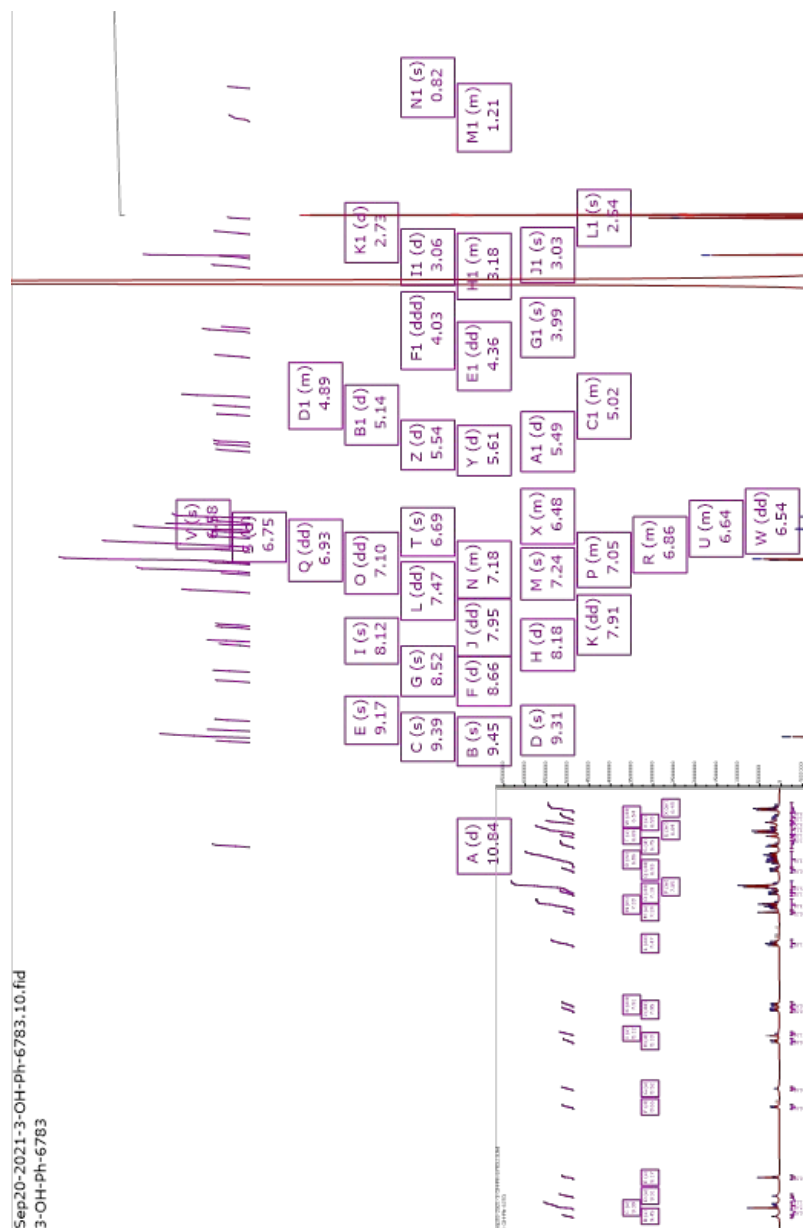

# $^{13}\text{C}$ -NMR of compound 19

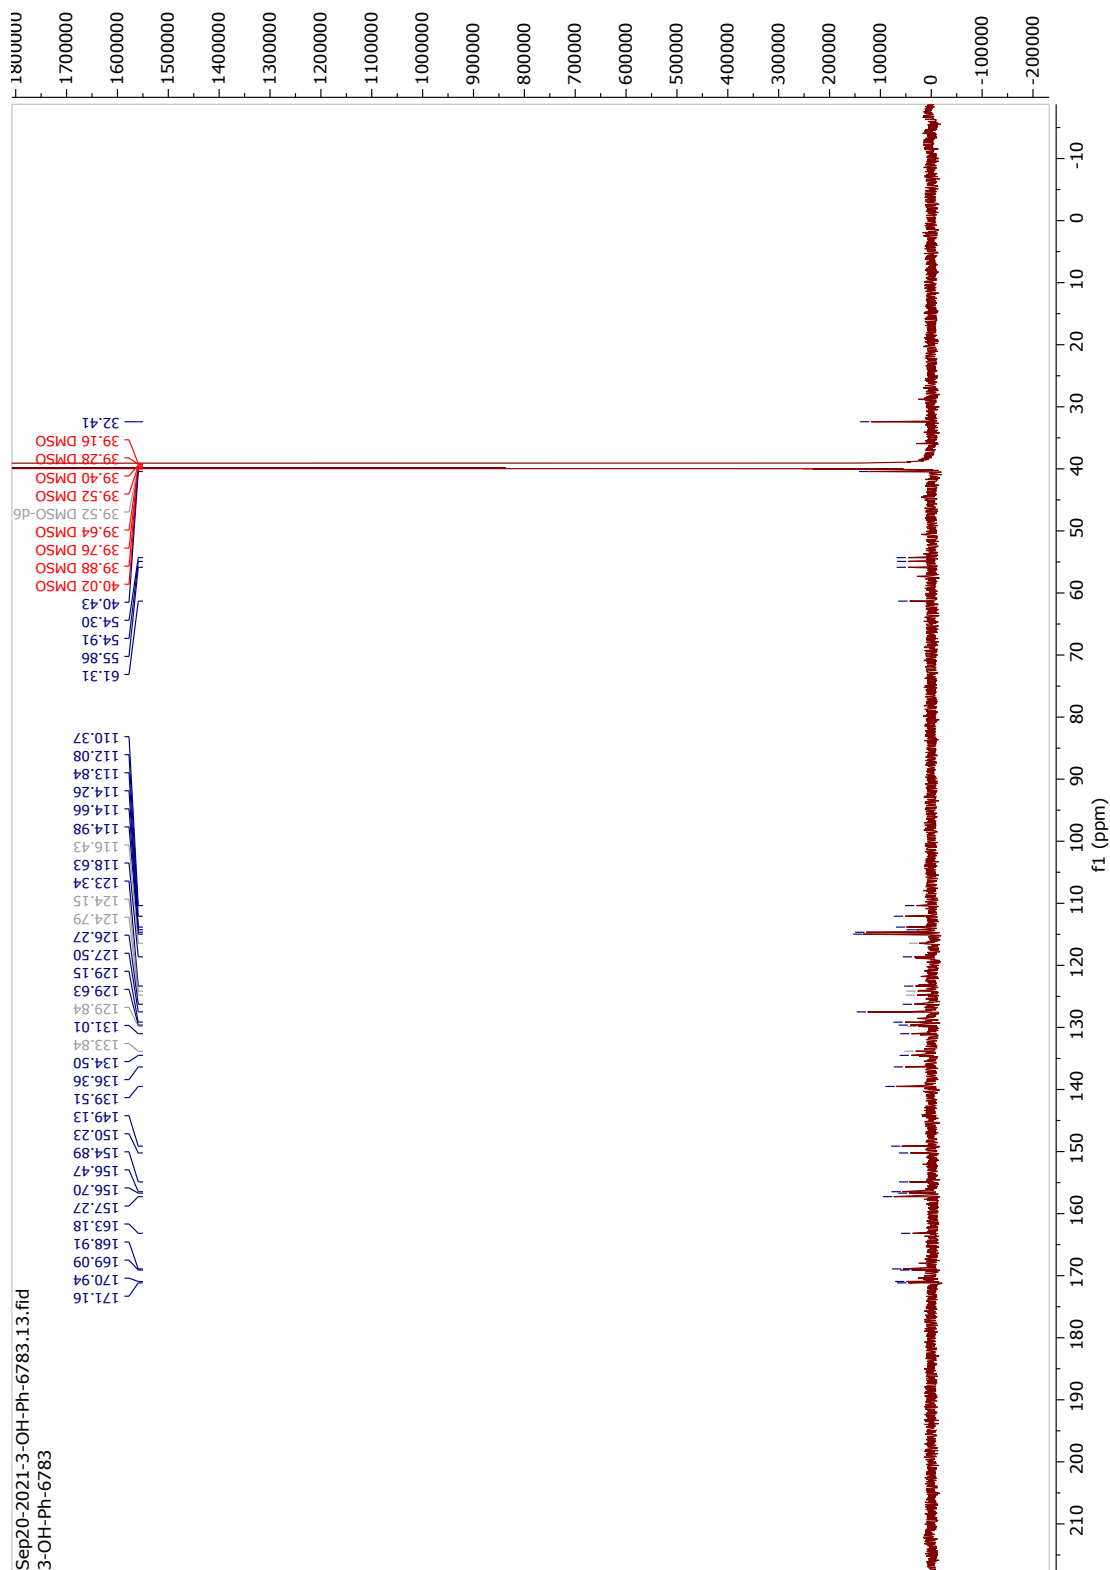

# Compound 20

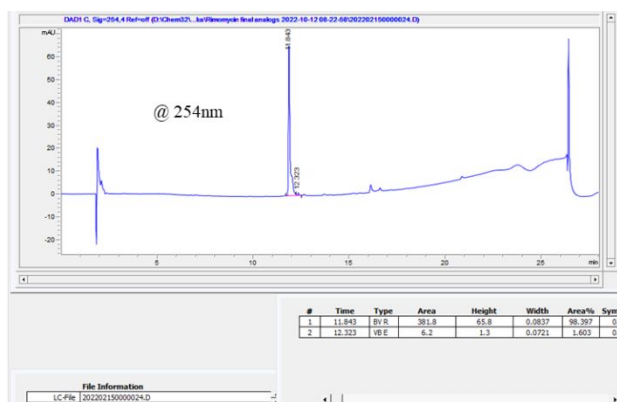

Compound 20

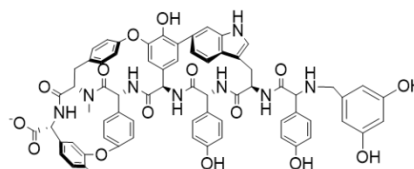

Chemical Formula:  $C_{68}H_{57}N_8O_{16}^-$   
Exact Mass: 1241.3898

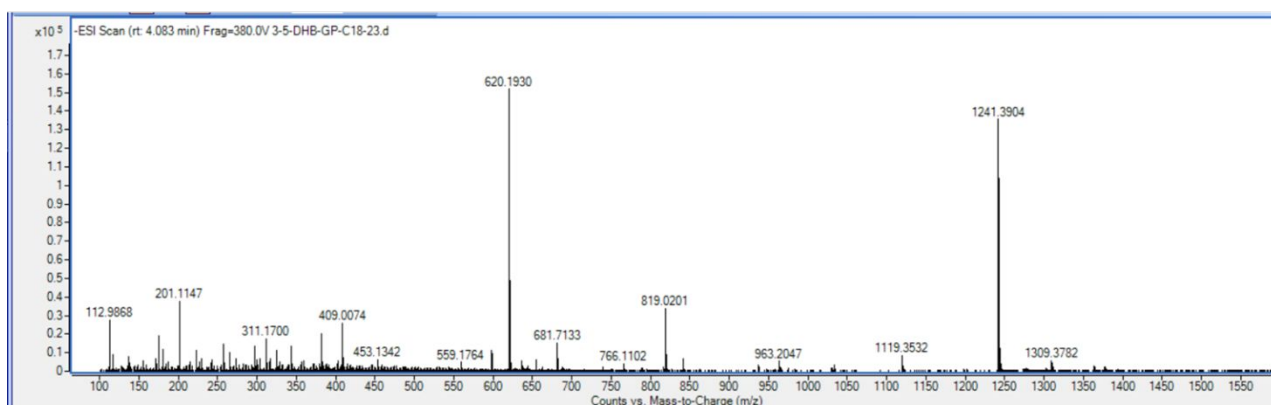



<sup>1</sup>H-NMR of compound 20

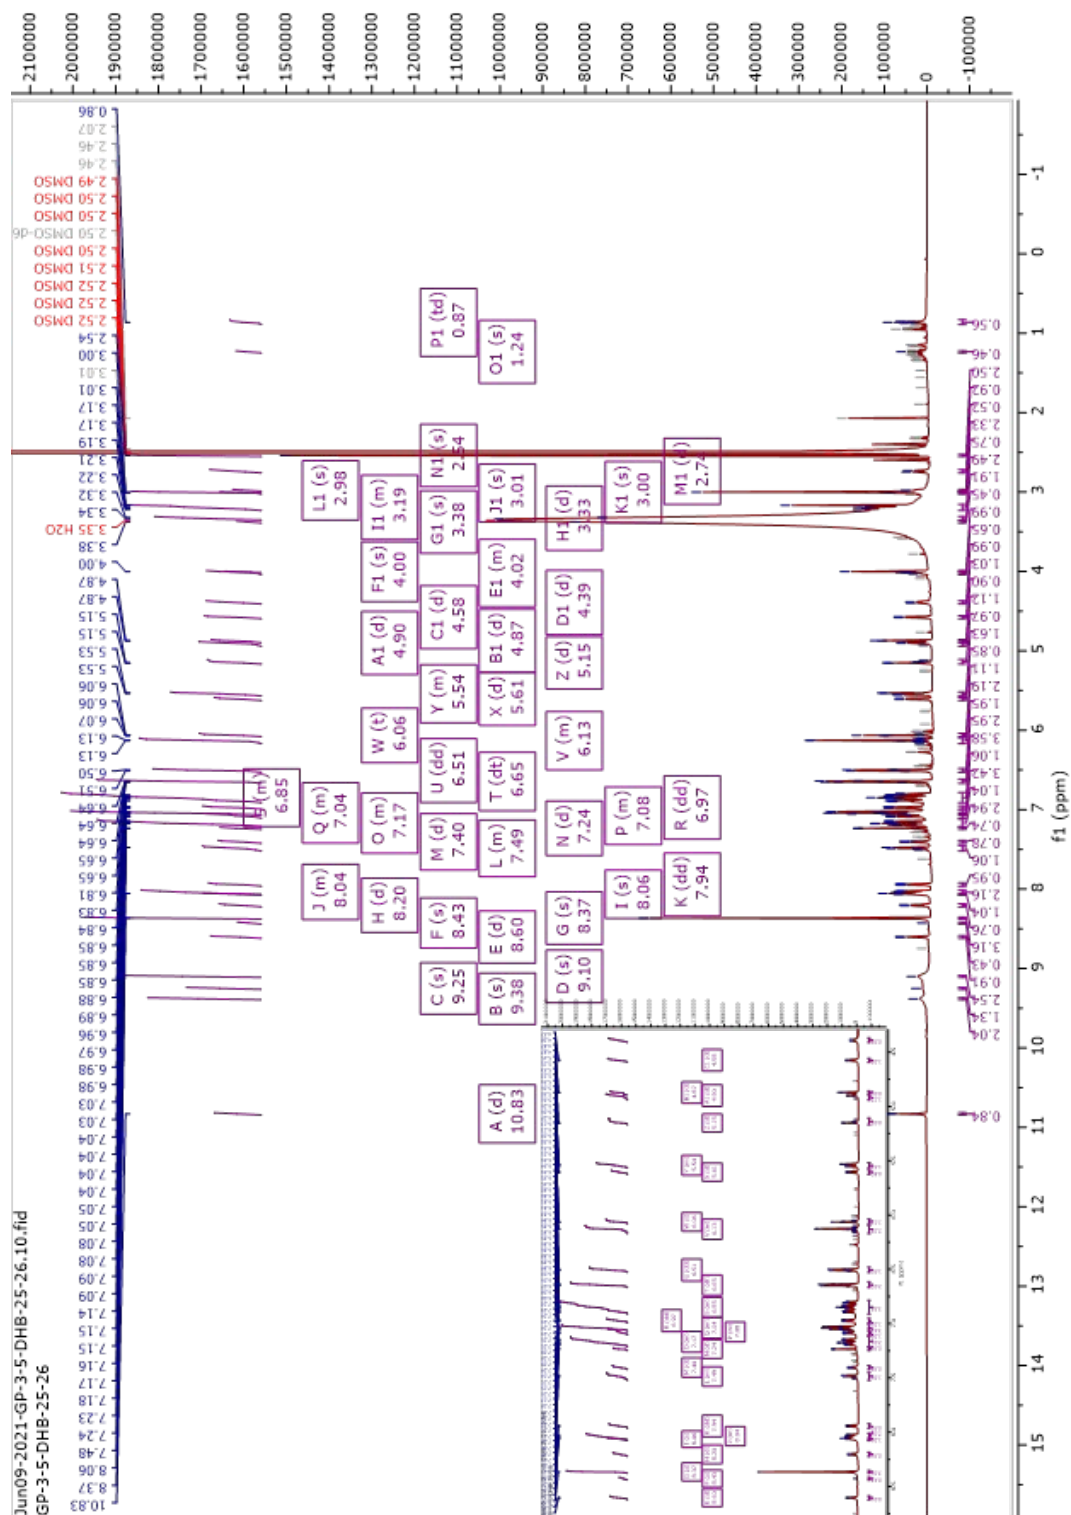

<sup>13</sup>C-NMR of compound 20

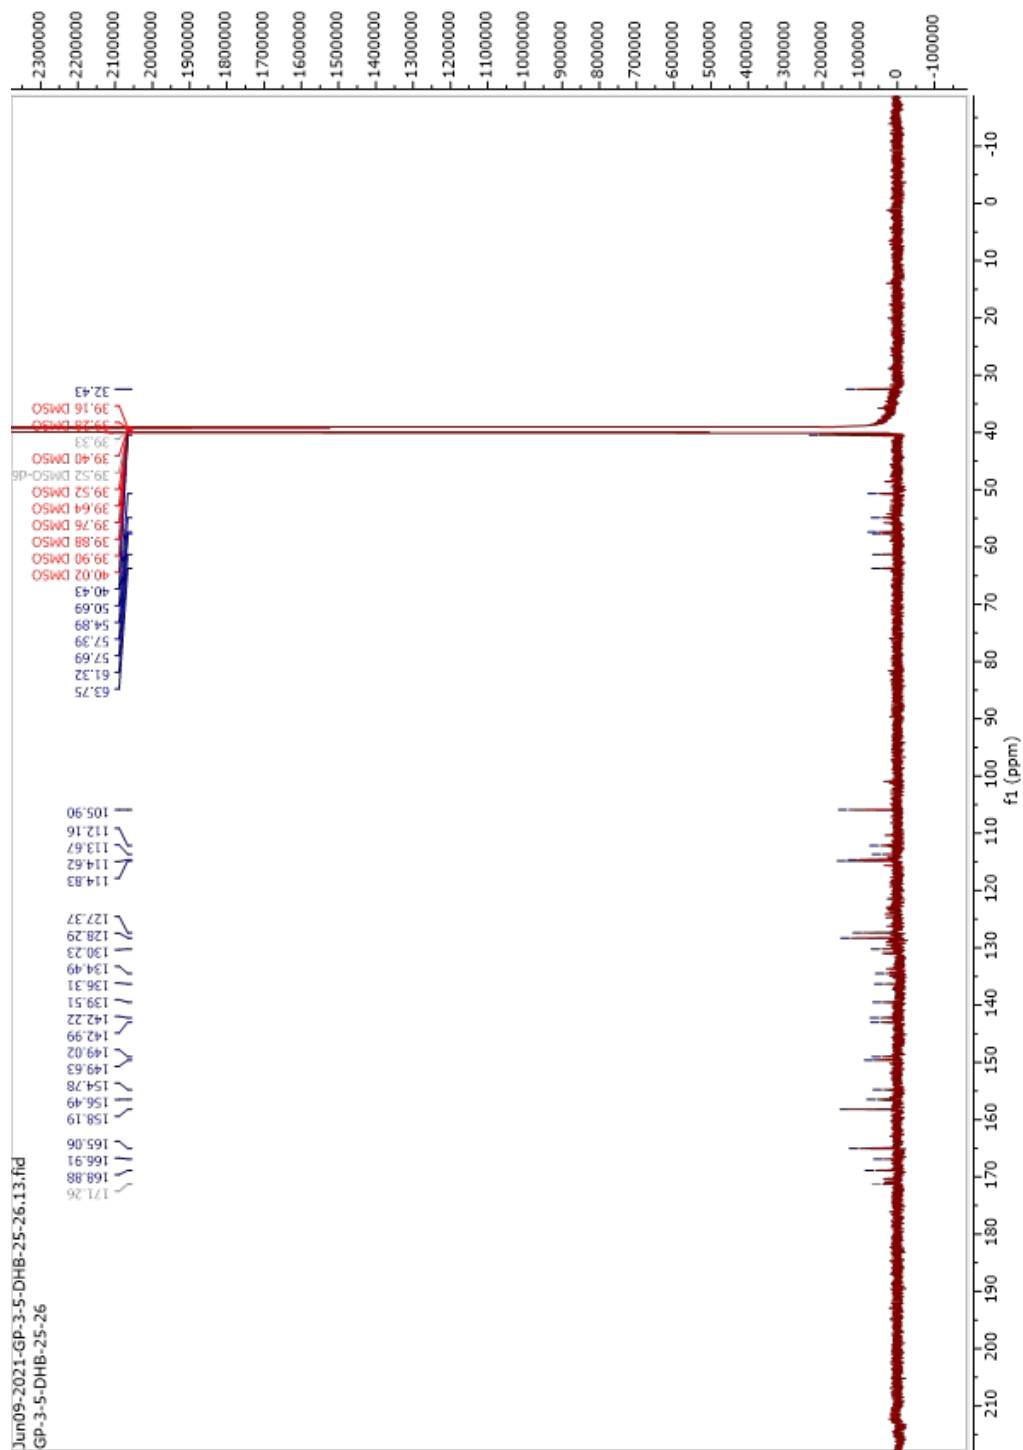

# Compound 21

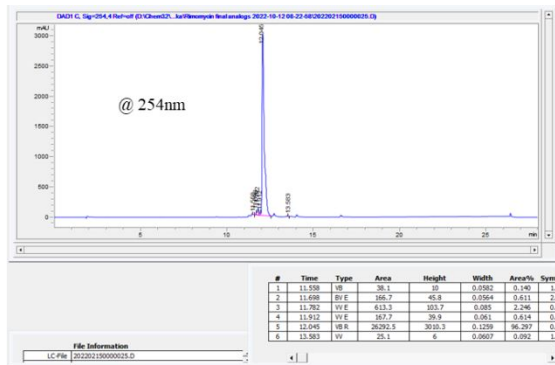

Compound 21

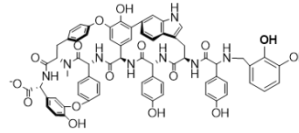

Chemical Formula:  $C_{68}H_{57}N_8O_{16}$   
Exact Mass: 1241.3898

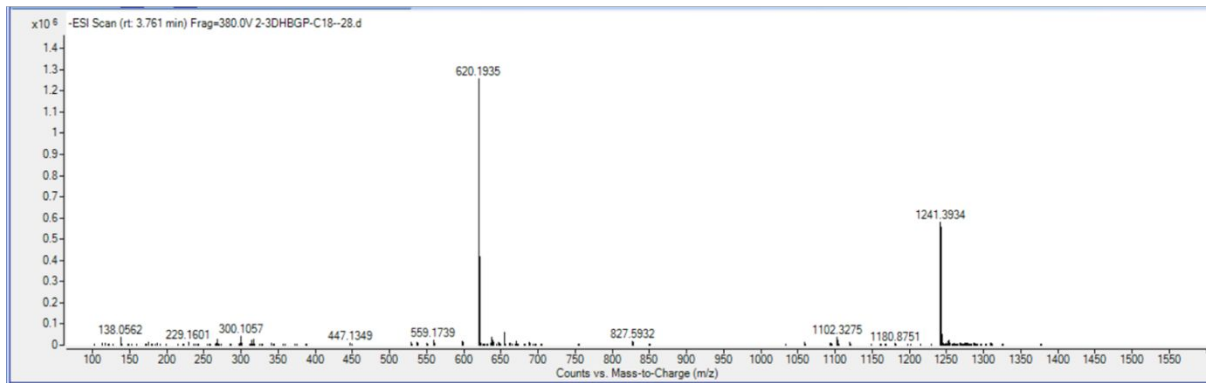

<sup>1</sup>H-NMR of compound 21

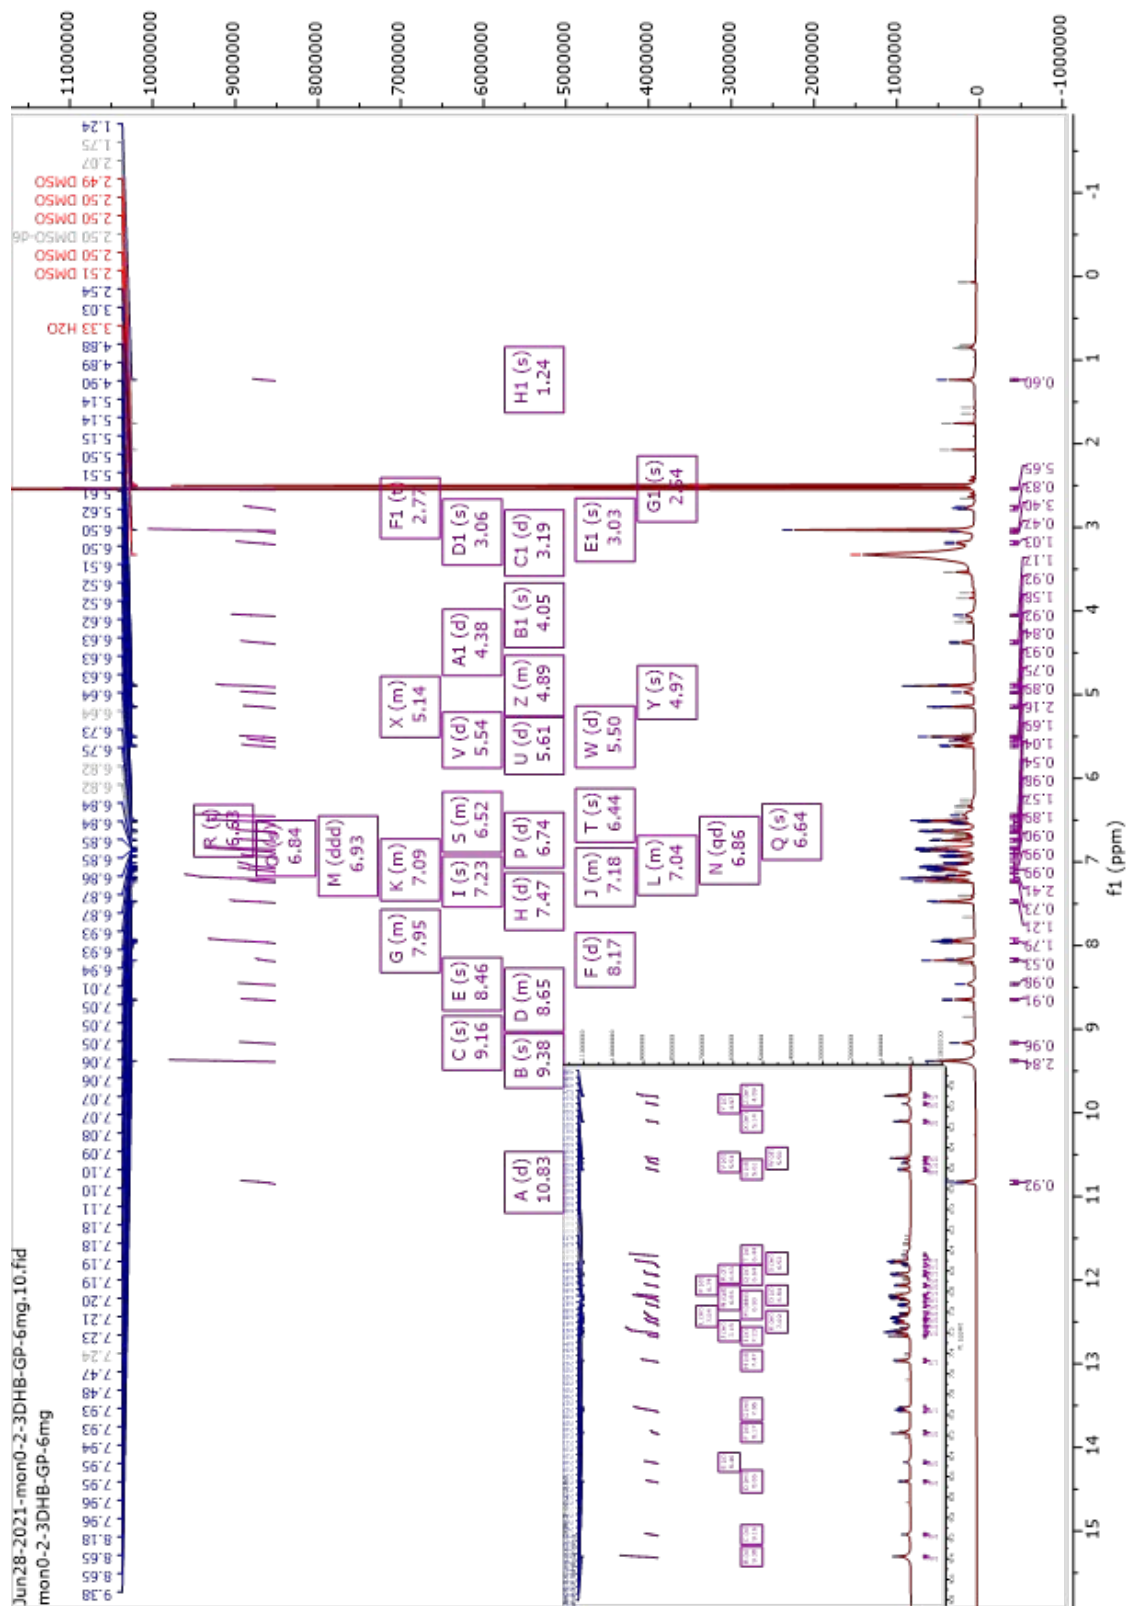

# $^{13}\text{C}$ -NMR of compound 21

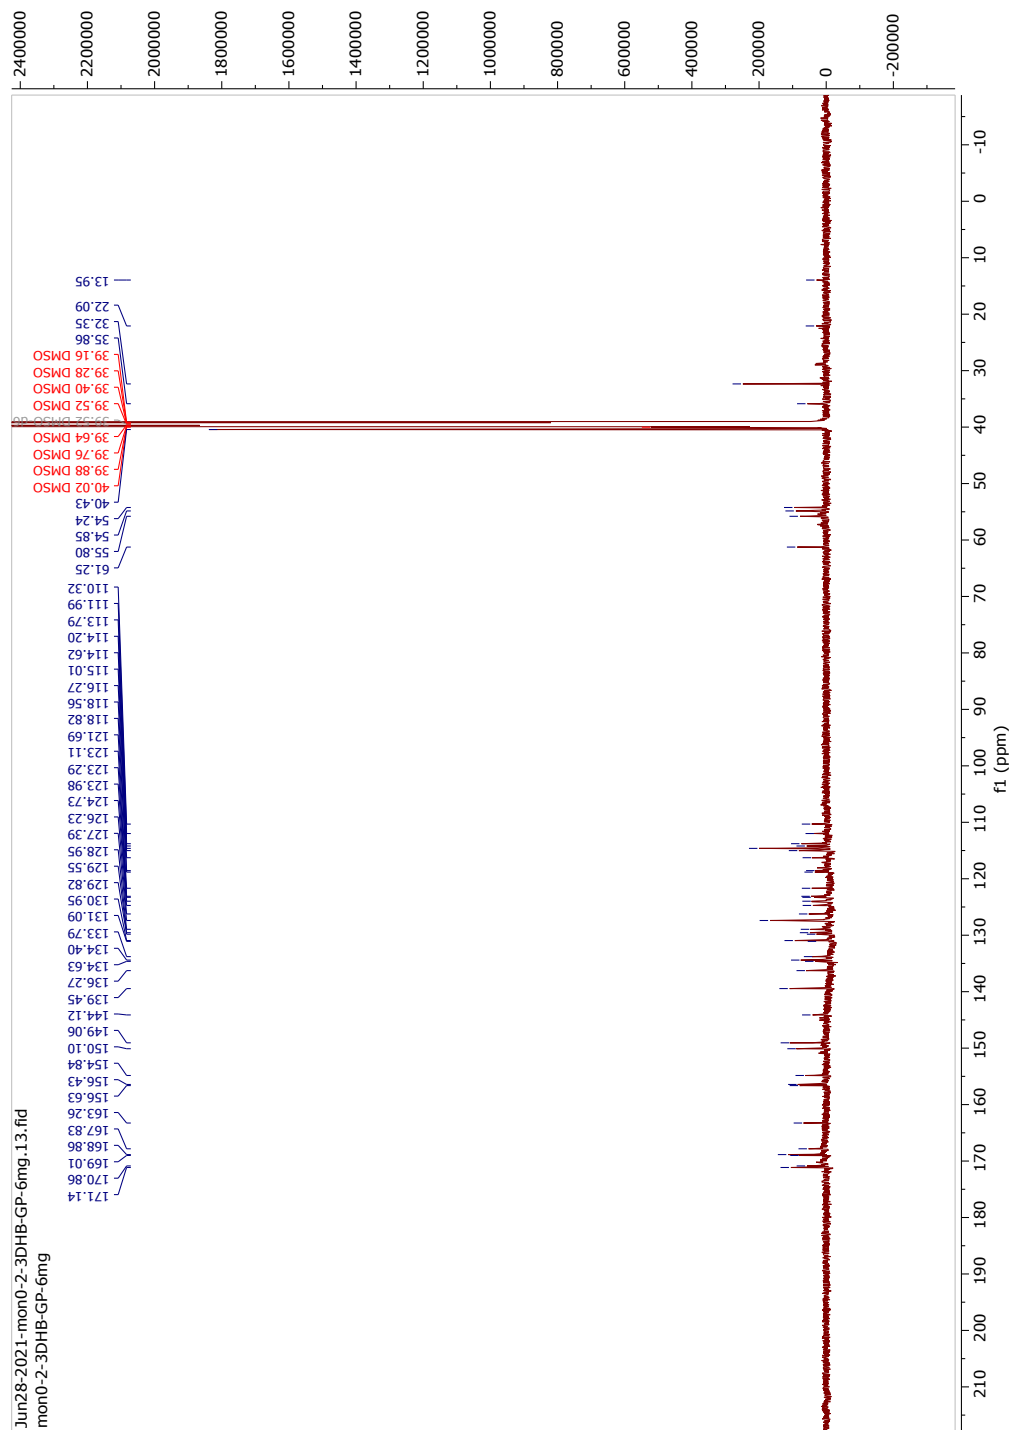

## Compound 22

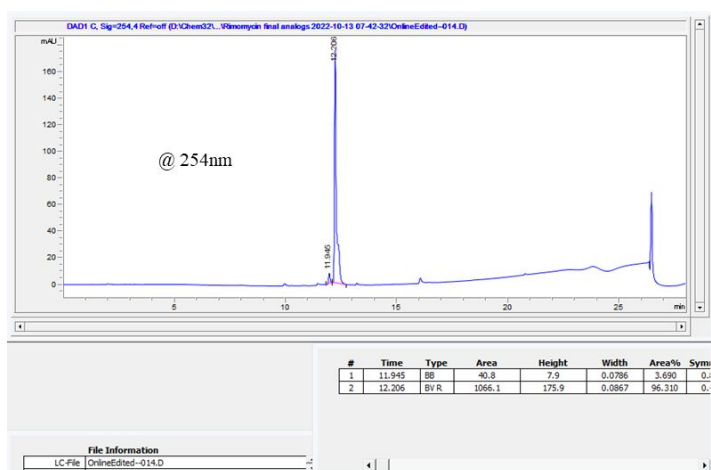

Compound 22

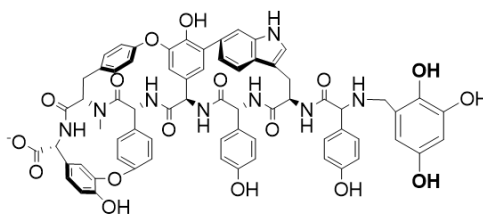

Chemical Formula:  $C_{68}H_{57}N_8O_{17}$   
Exact Mass: 1257.3847

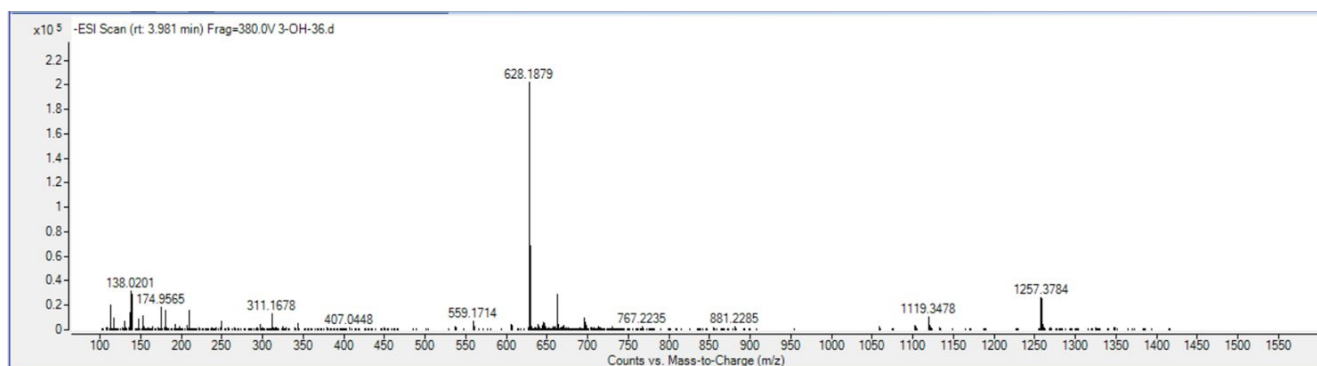

<sup>1</sup>H-NMR of compound 22

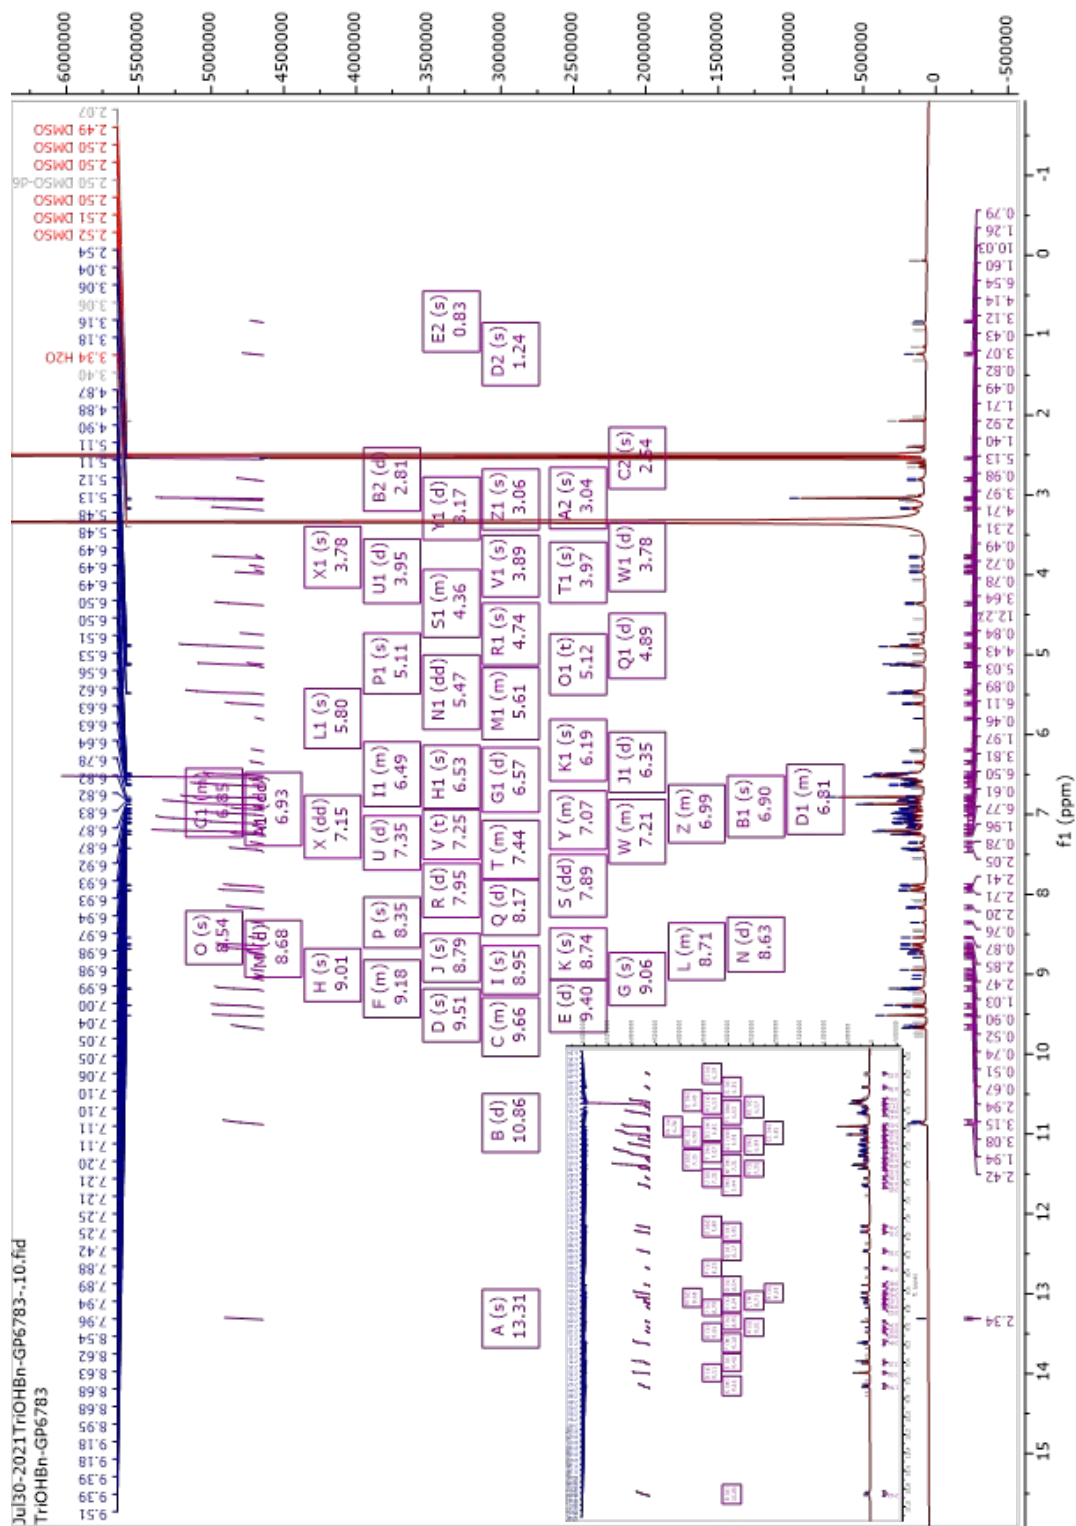





# Compound 23

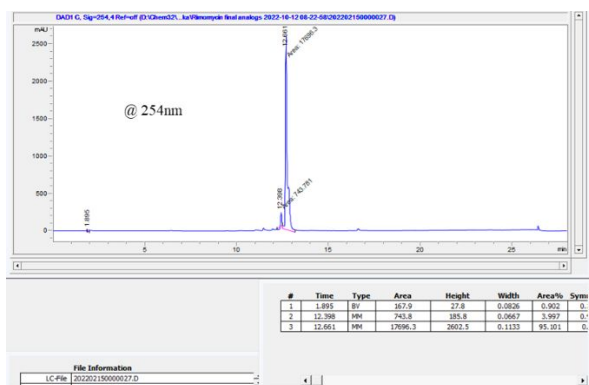

Compound 23

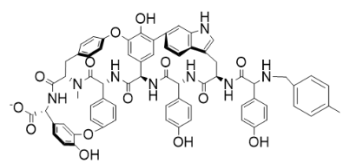

Chemical Formula:  $C_{68}H_{56}FNa_{14}O_{14}^-$   
Exact Mass: 1227.3906

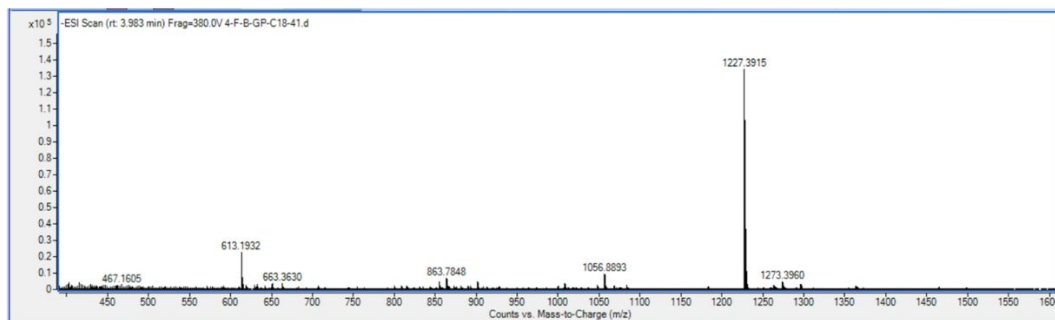



$^{13}\text{C}$ -NMR of compound 23

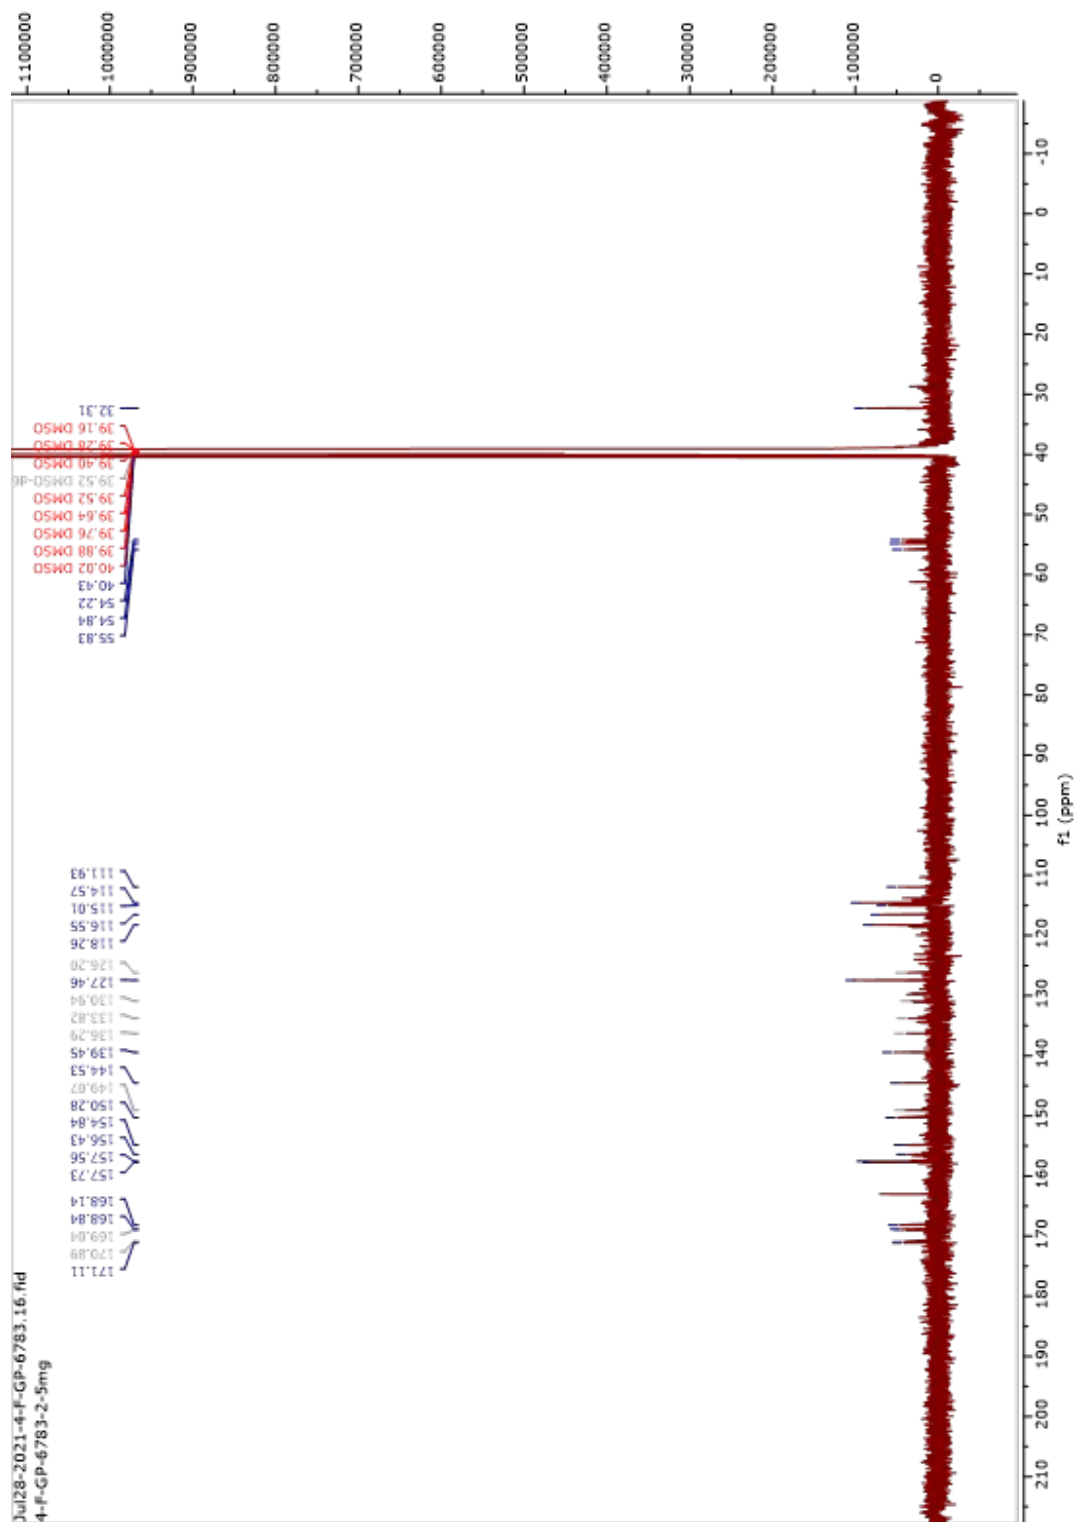

# <sup>19</sup>F-NMR of compound **23**

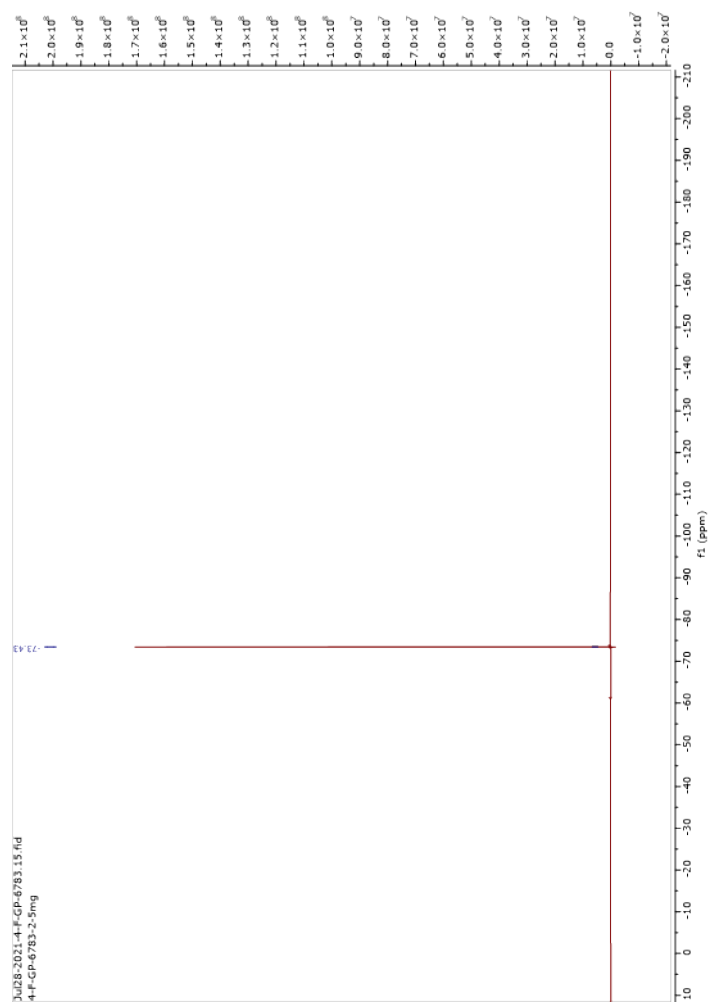

# Compound 24

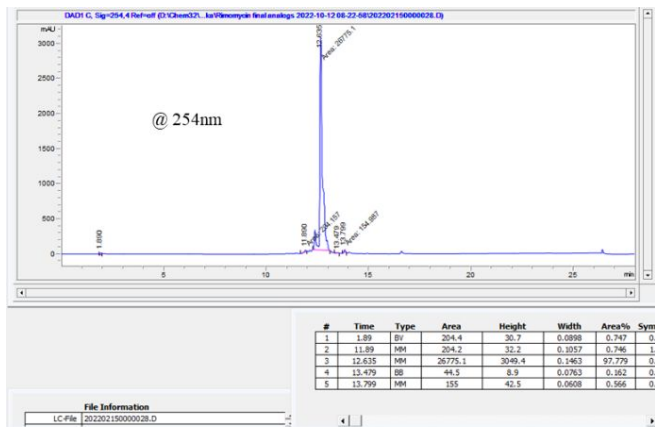

Compound24

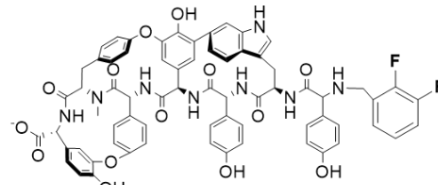

Chemical Formula:  $C_{68}H_{55}F_2N_8O_{14}^-$   
Exact Mass: 1245.3811

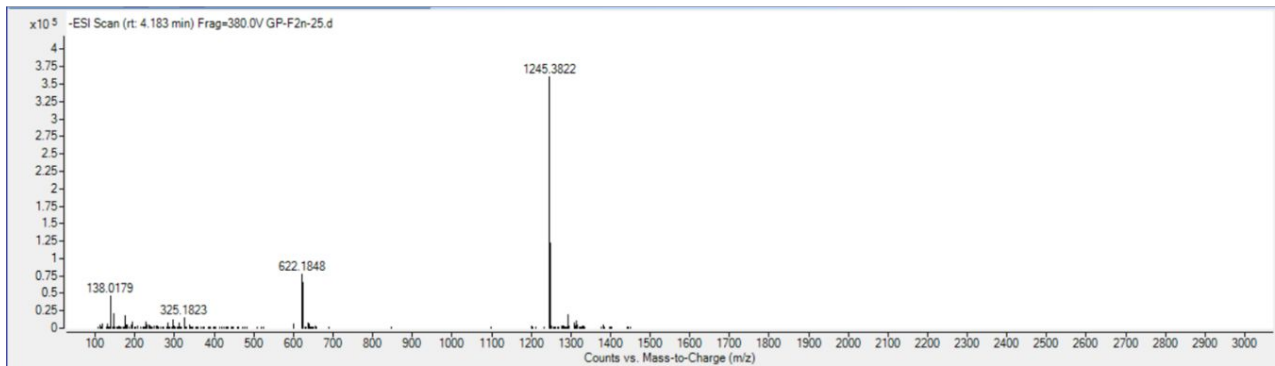

<sup>1</sup>H-NMR of compound 24

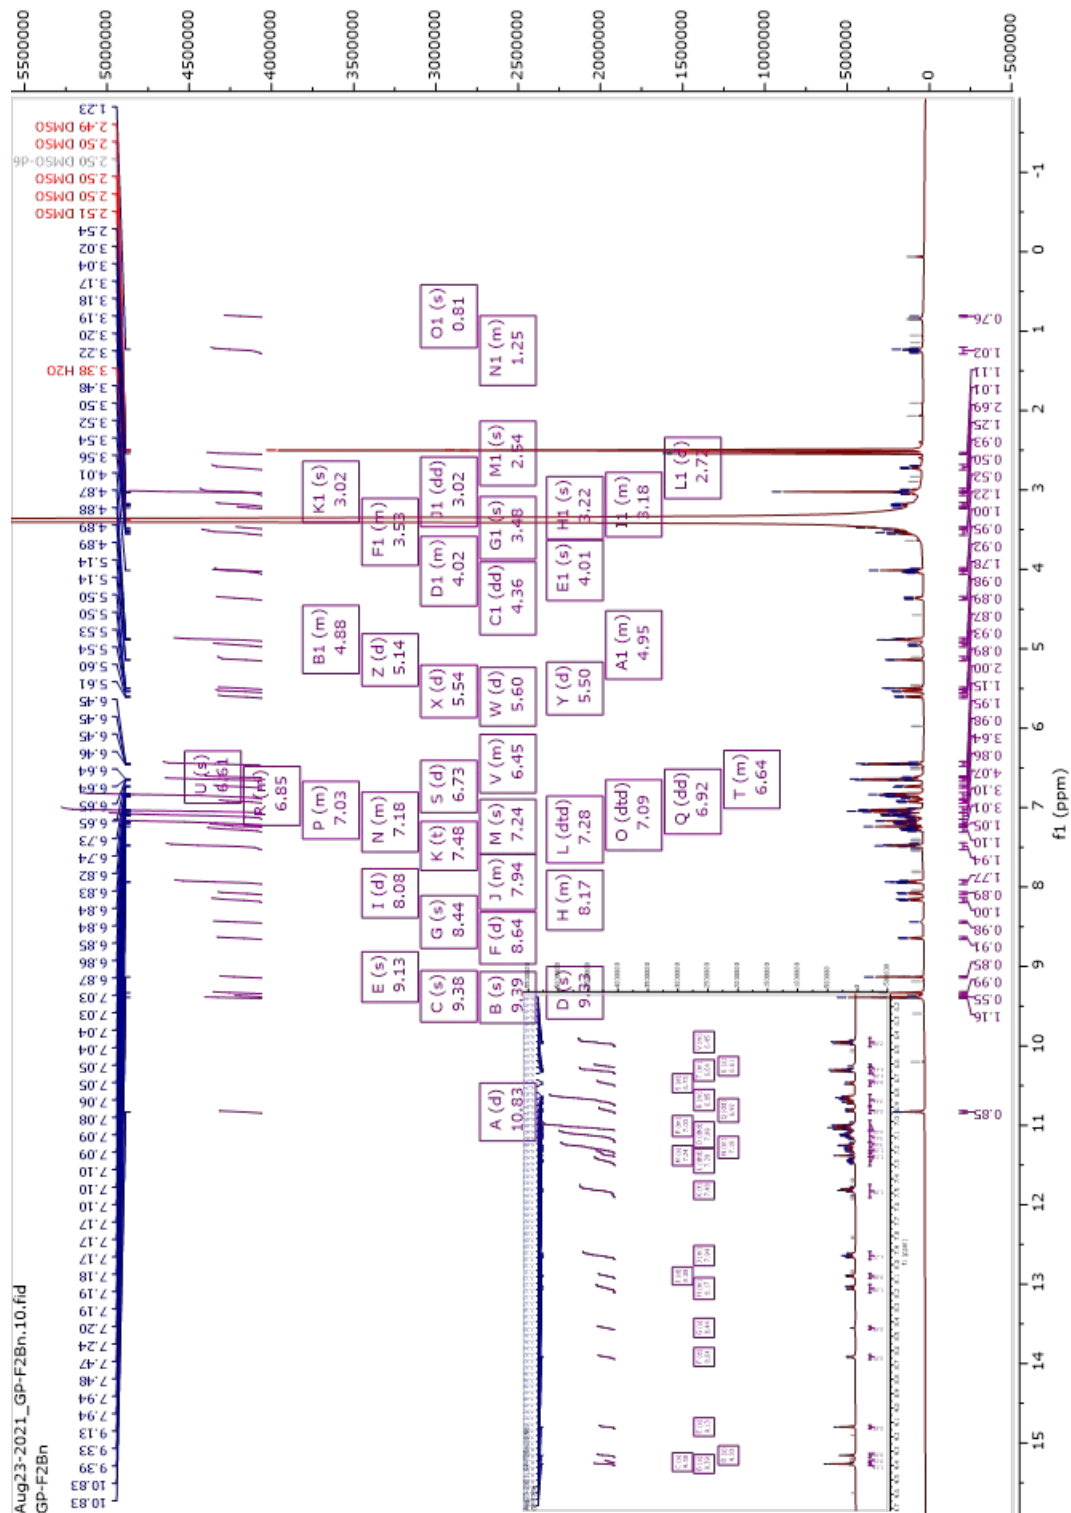

# <sup>13</sup>C-NMR of compound 24

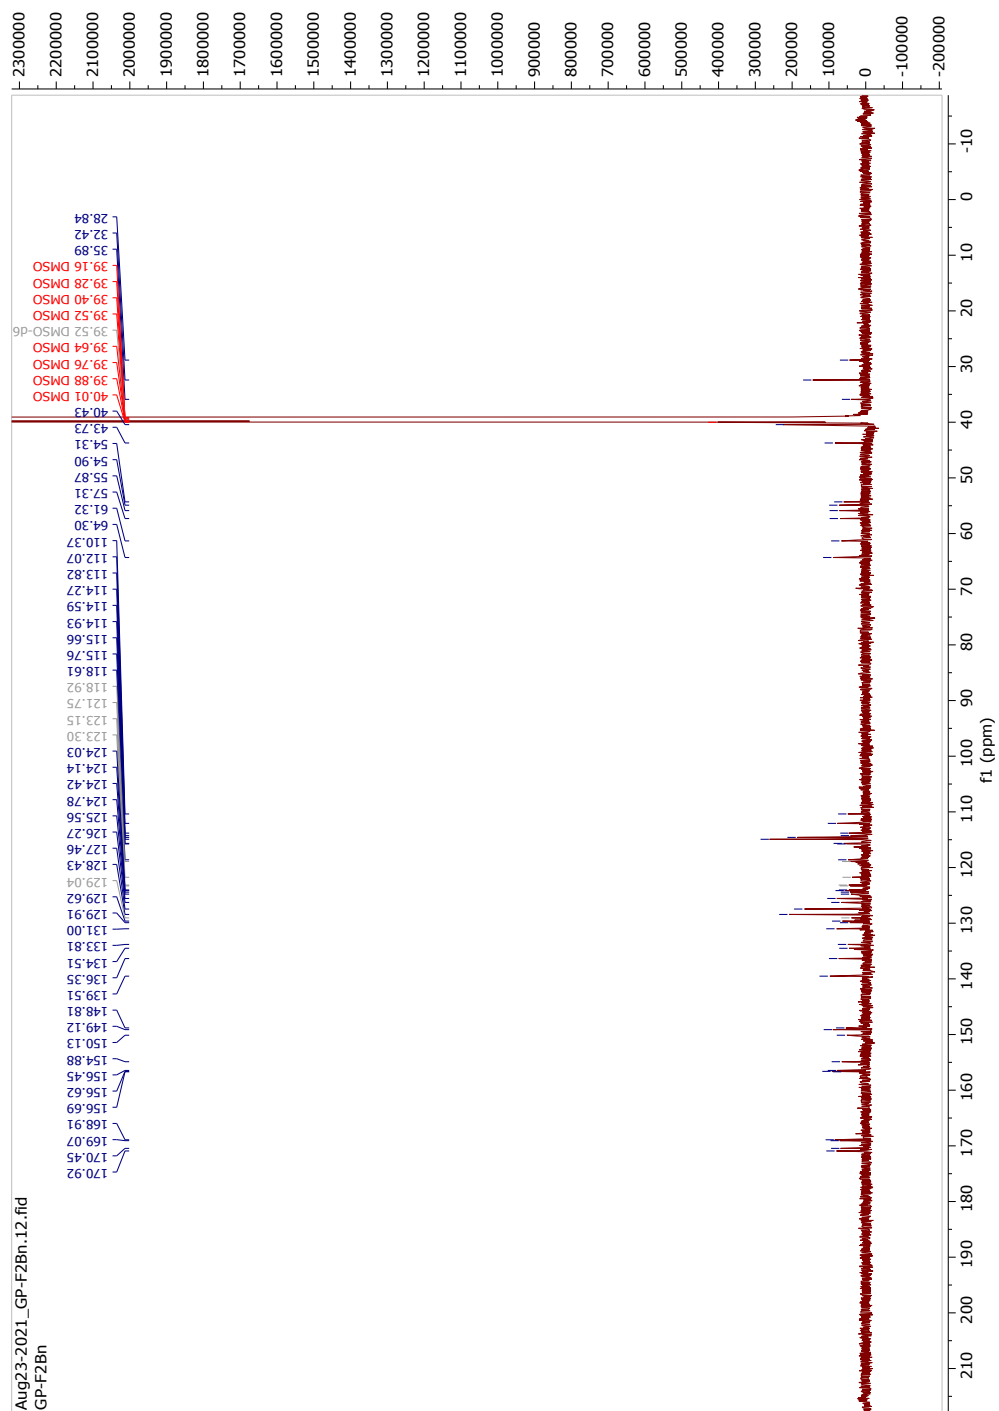

# Compound 25

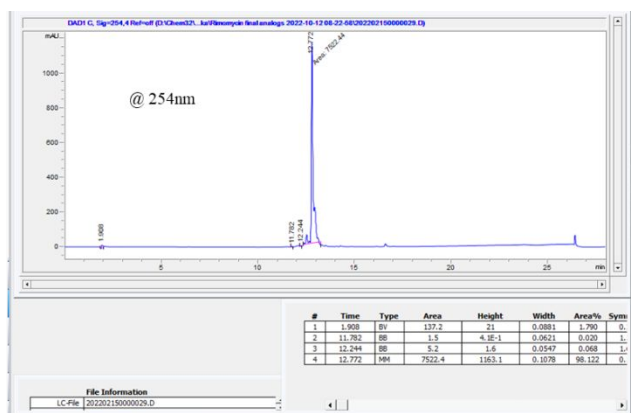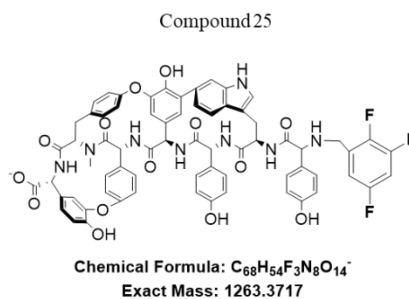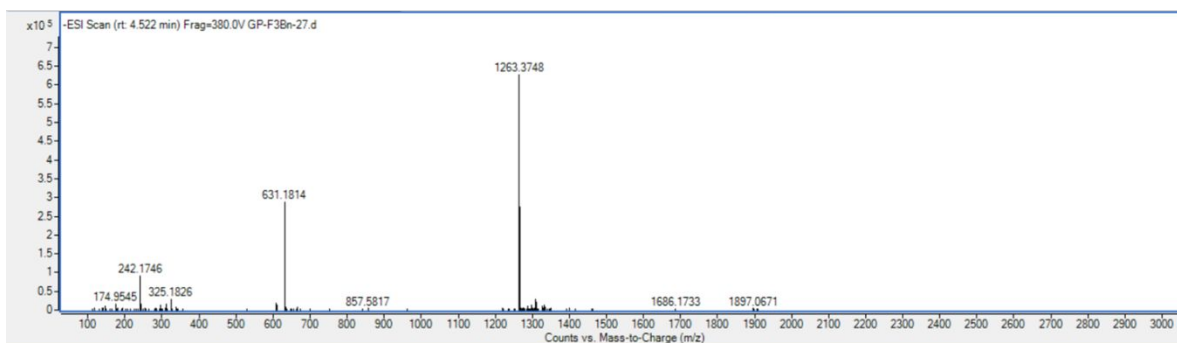





# $^{13}\text{C}$ -NMR of compound **25**

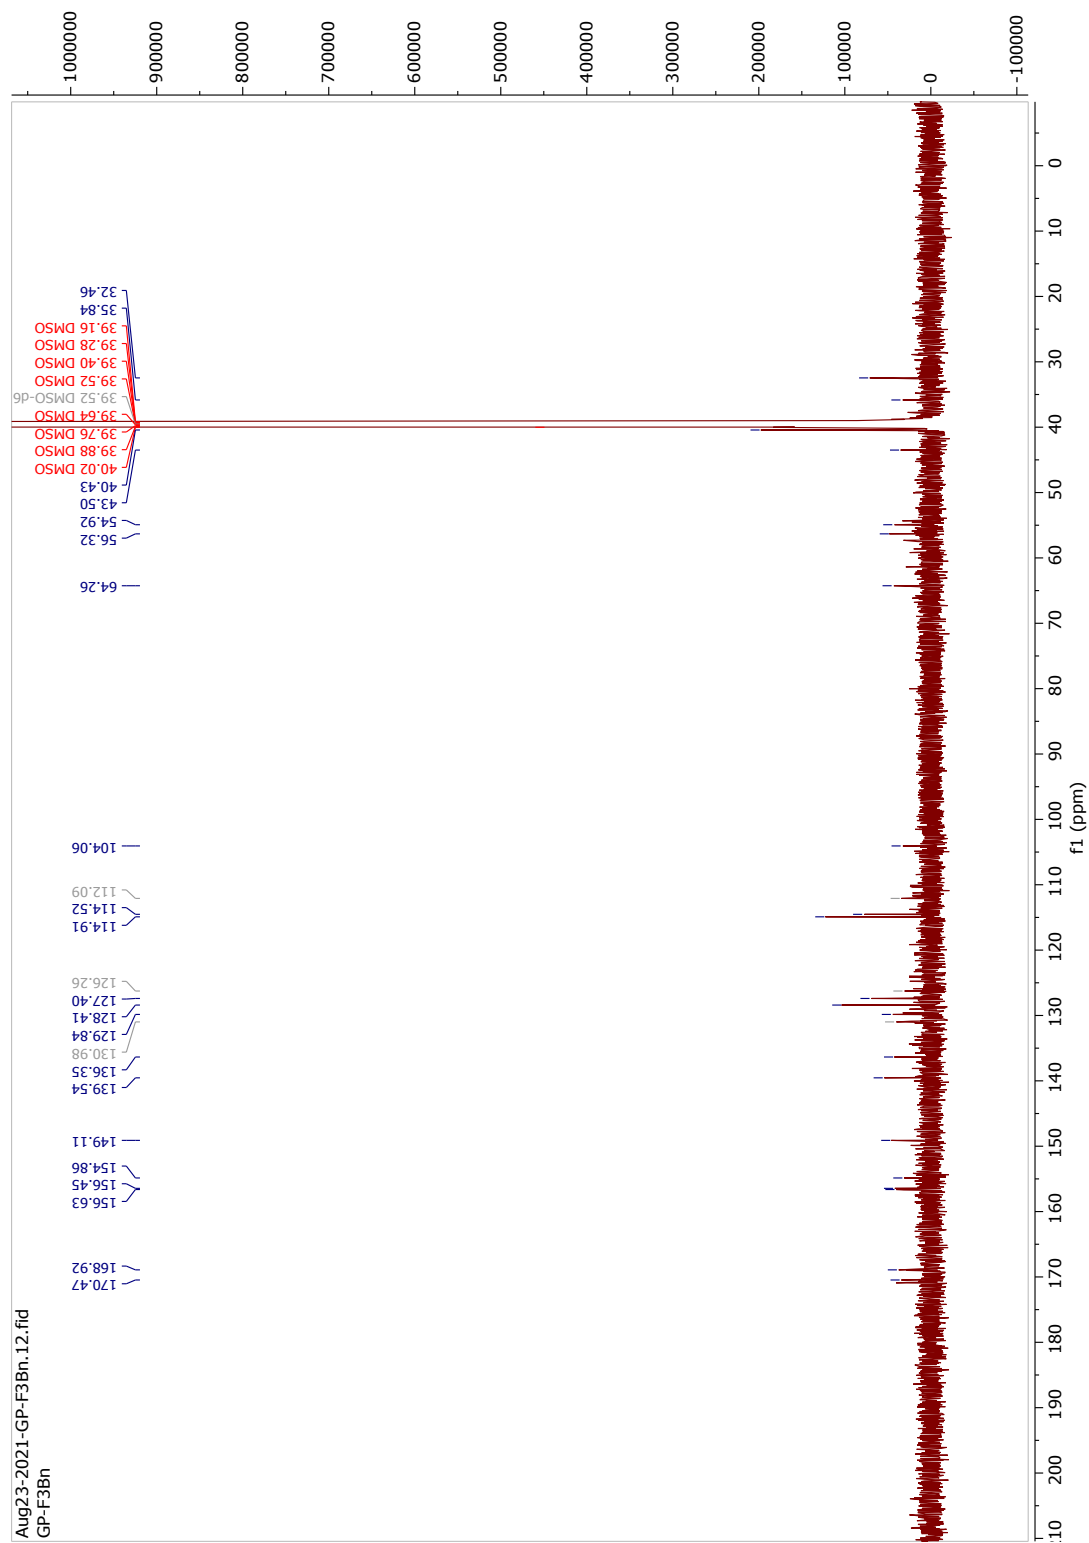

# Compound 26

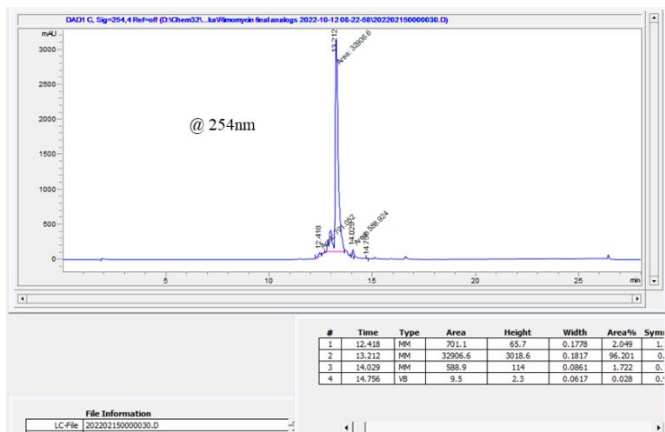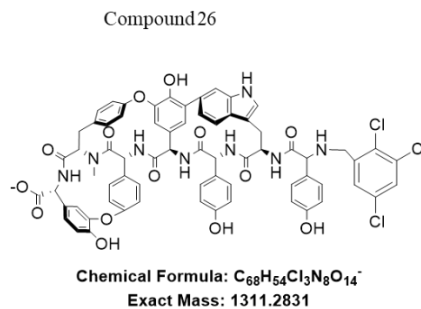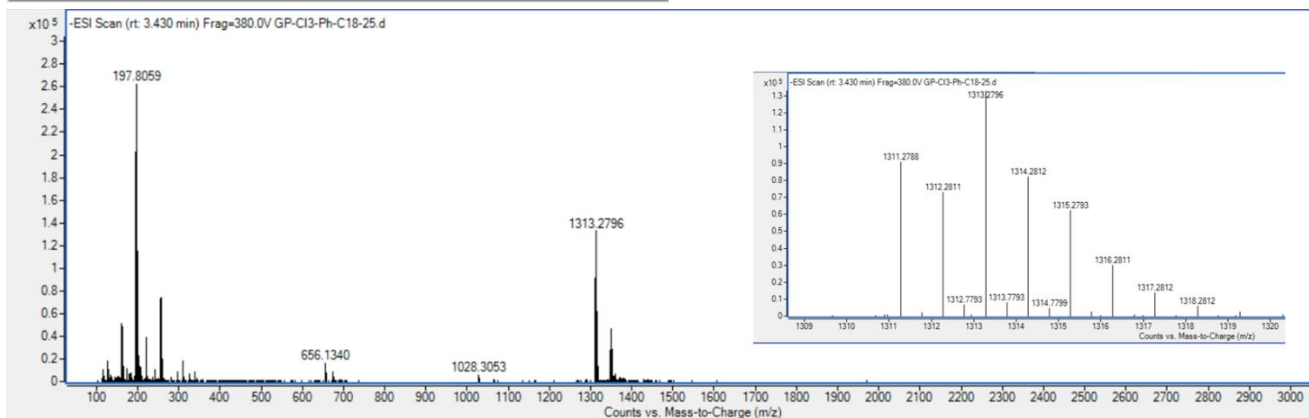

<sup>1</sup>H-NMR of compound 26

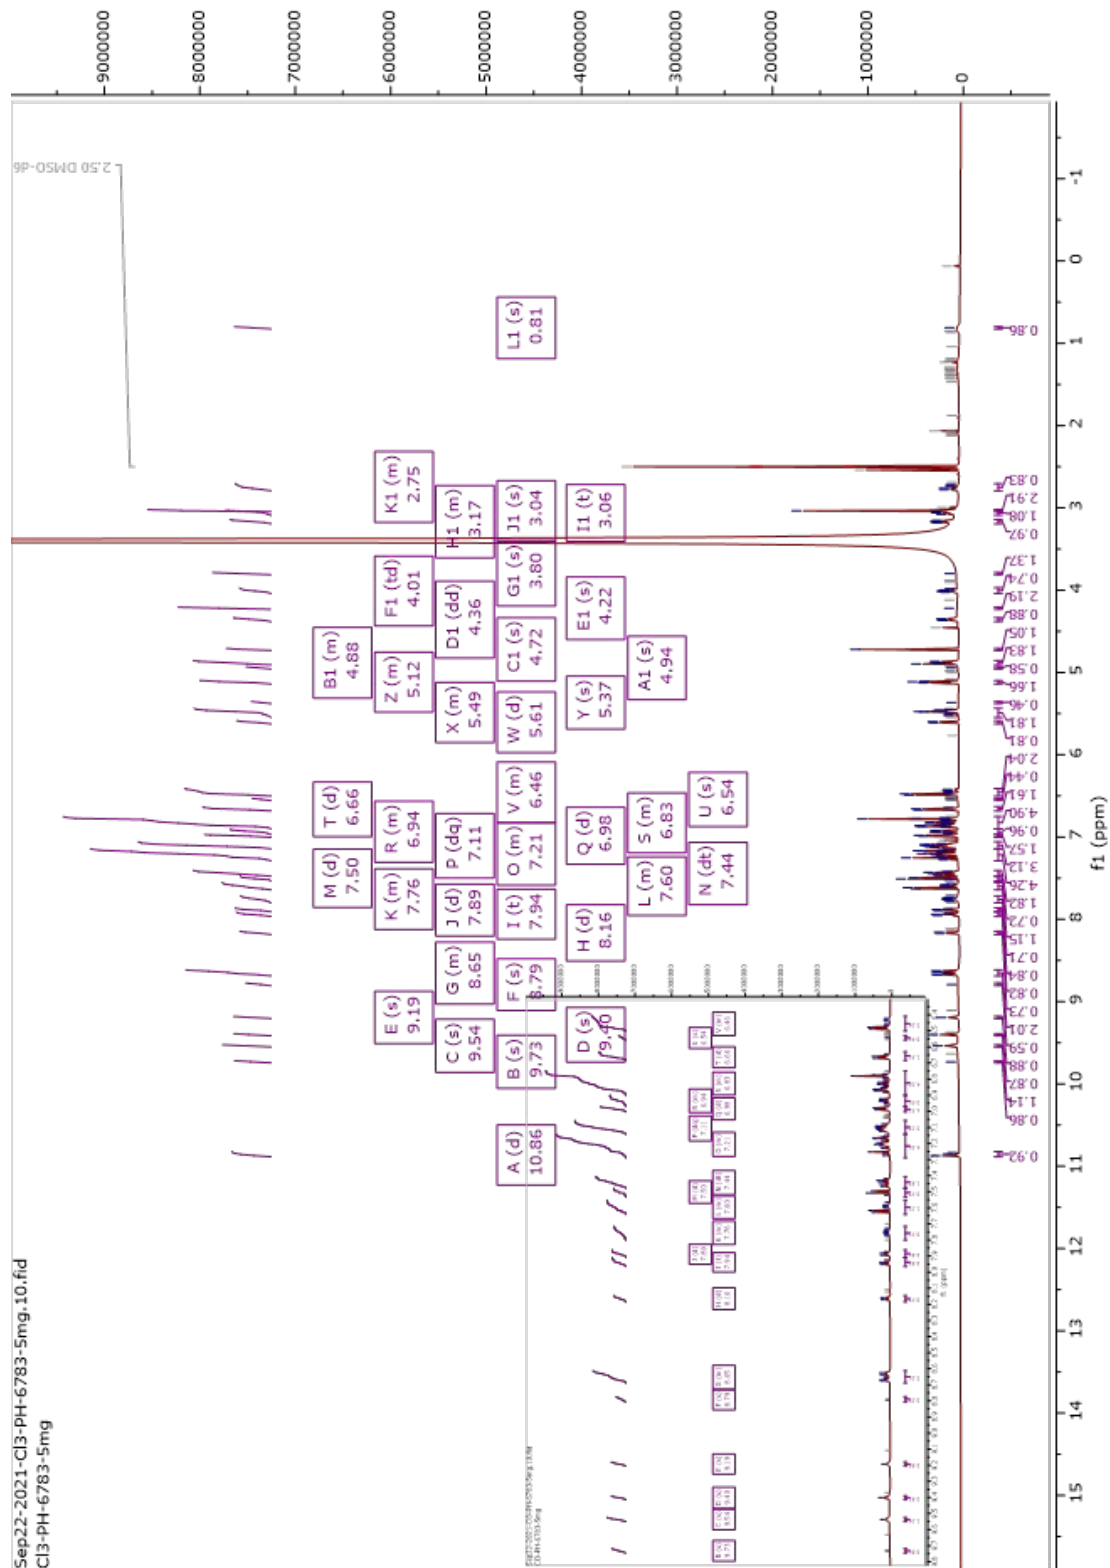

# <sup>13</sup>C-NMR of compound 26

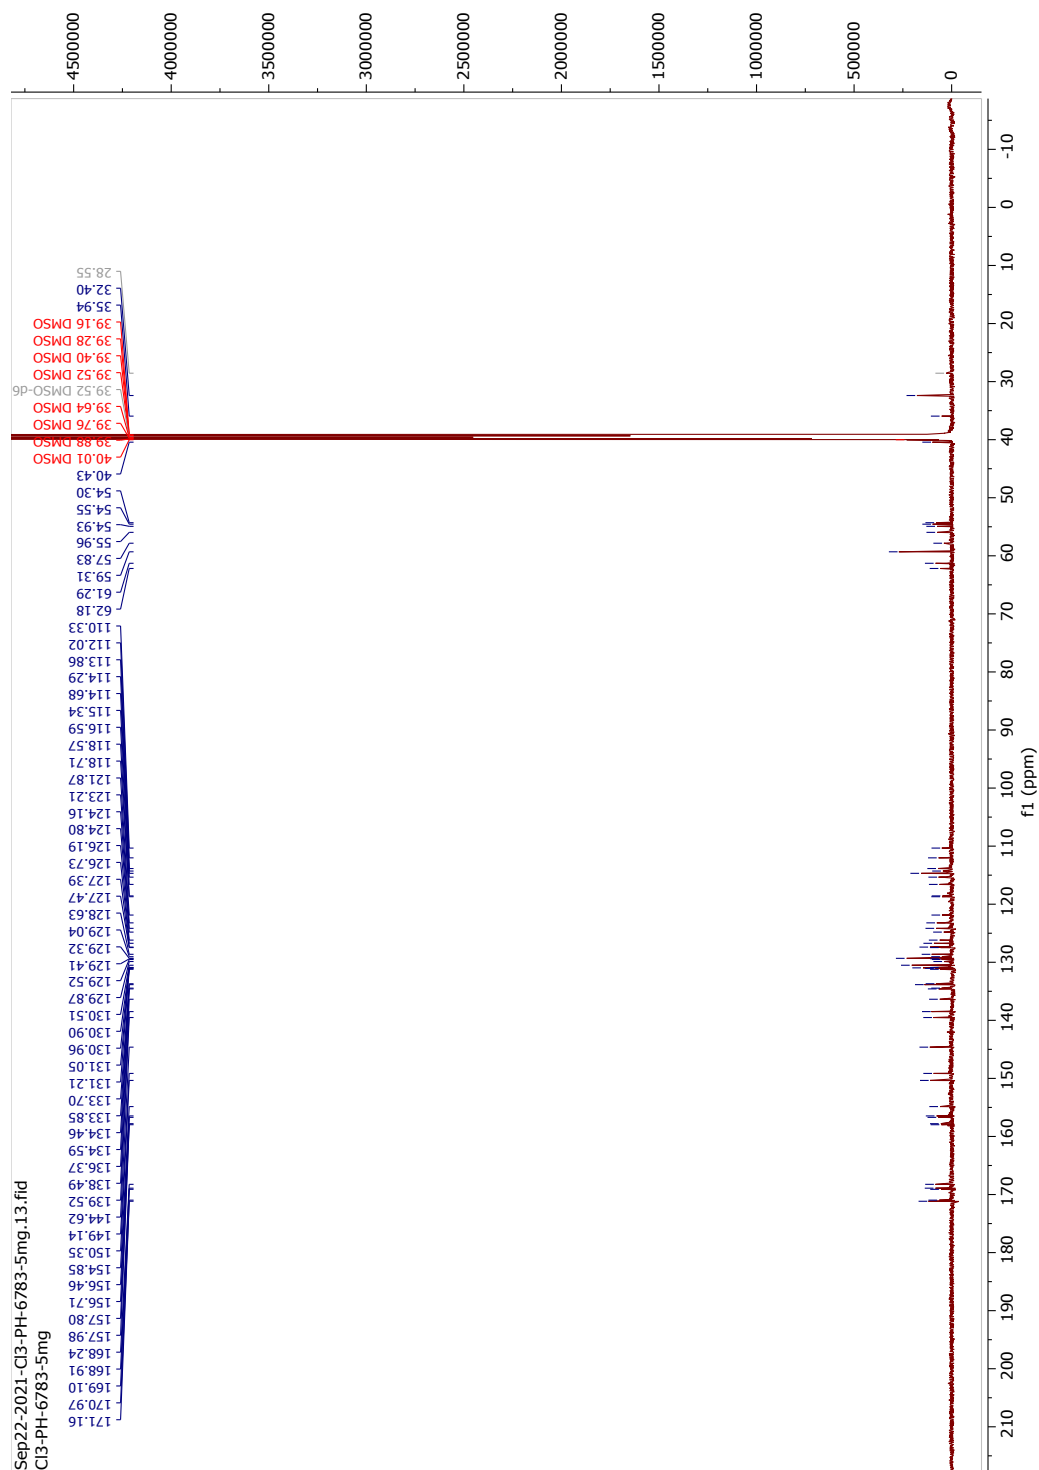

# Compound 27

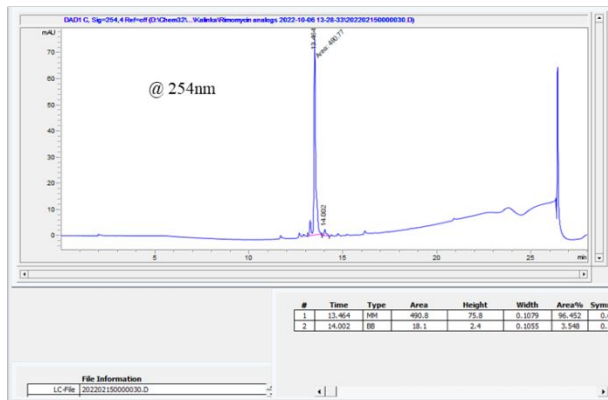

Compound 27

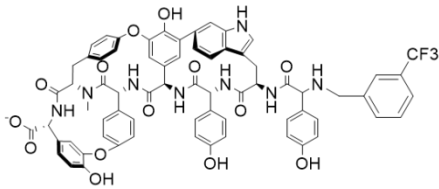

Chemical Formula:  $C_{69}H_{56}F_3N_8O_{14}^-$   
Exact Mass: 1277.3874

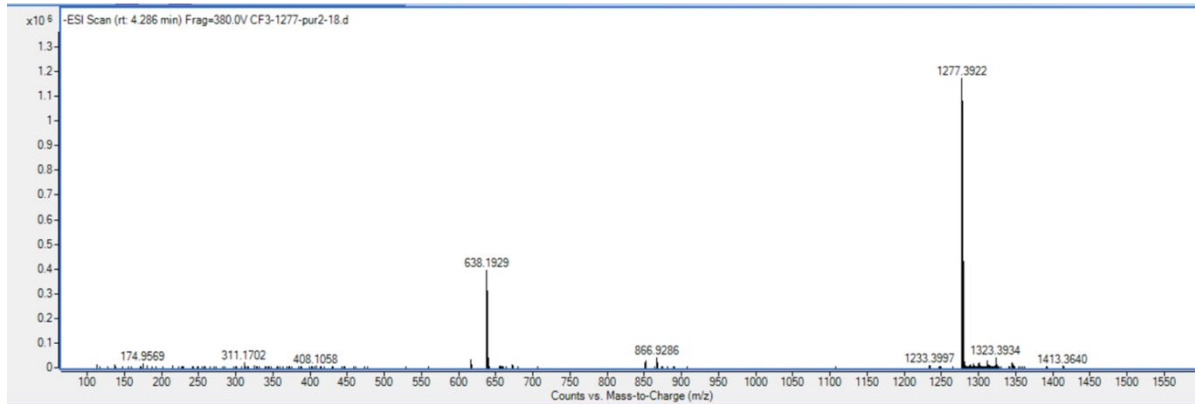

<sup>1</sup>H-NMR of compound 27

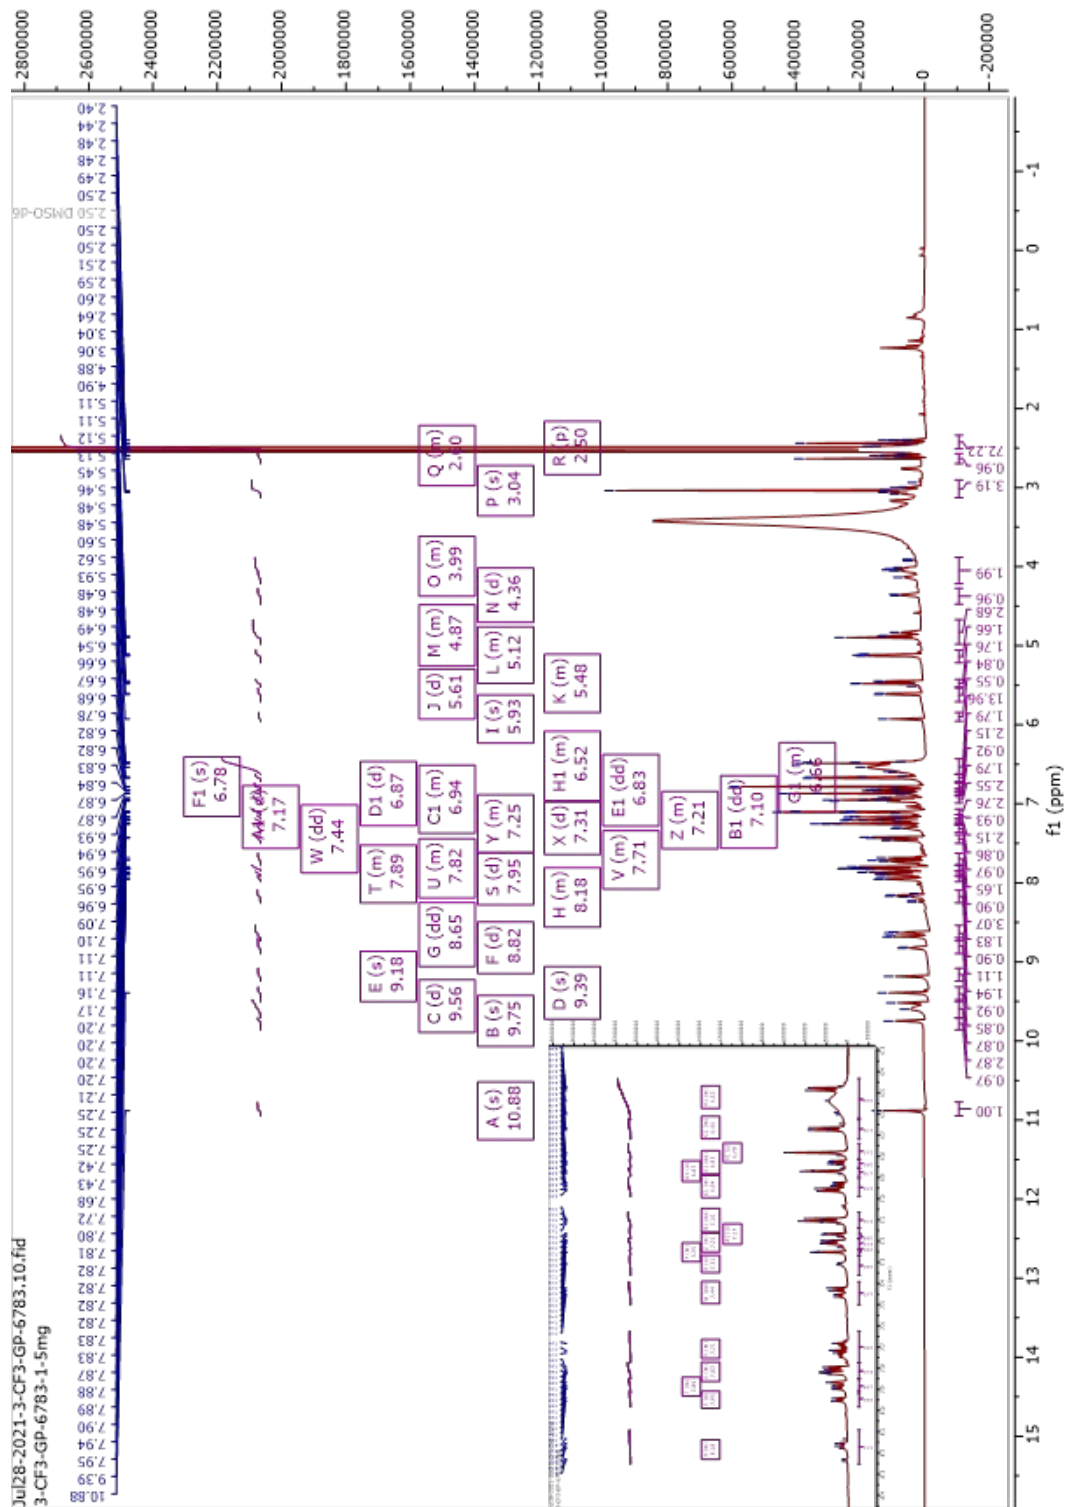

$^{13}\text{C}$ -NMR of compound 27

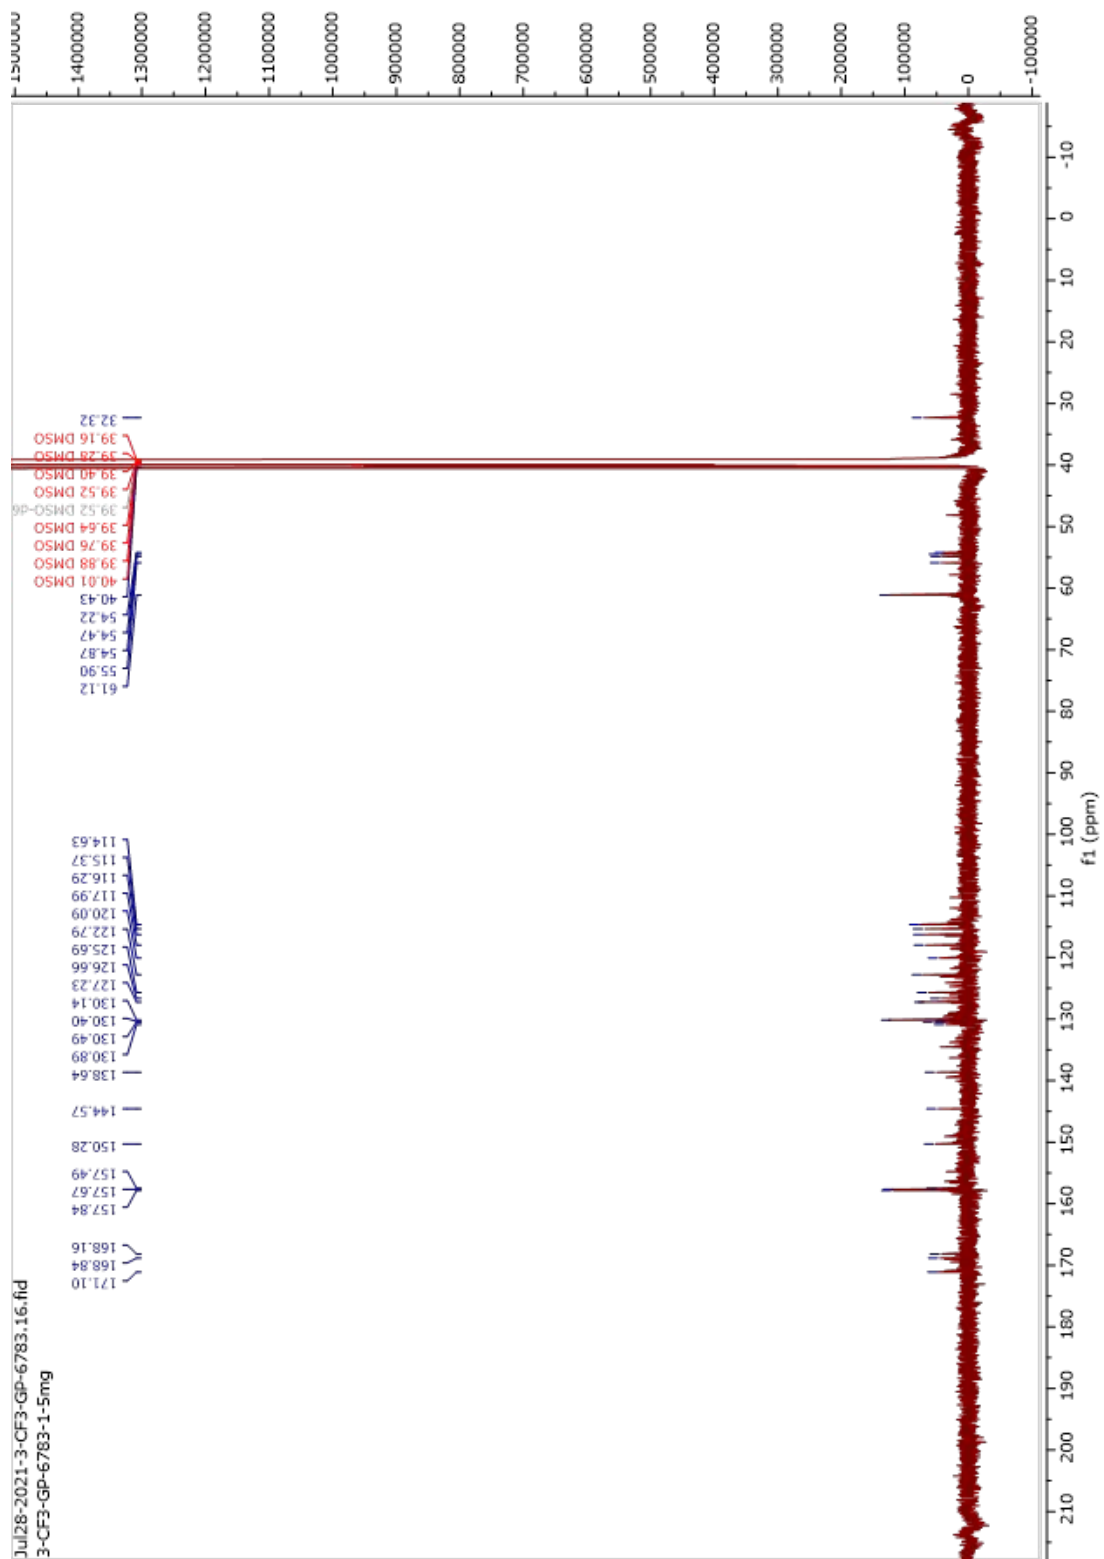



# Compound 28

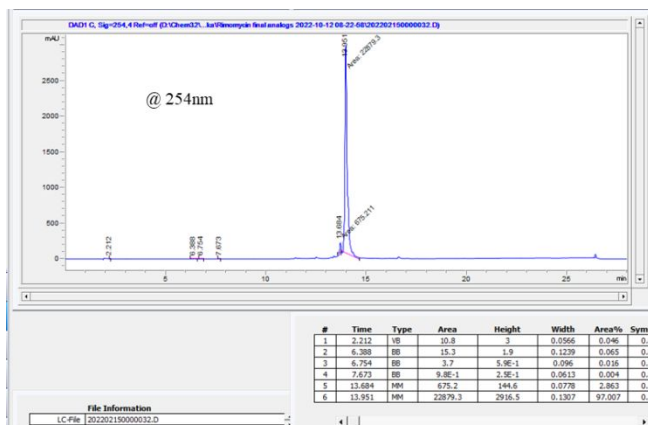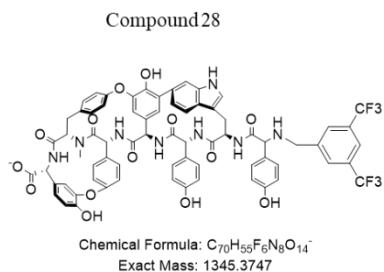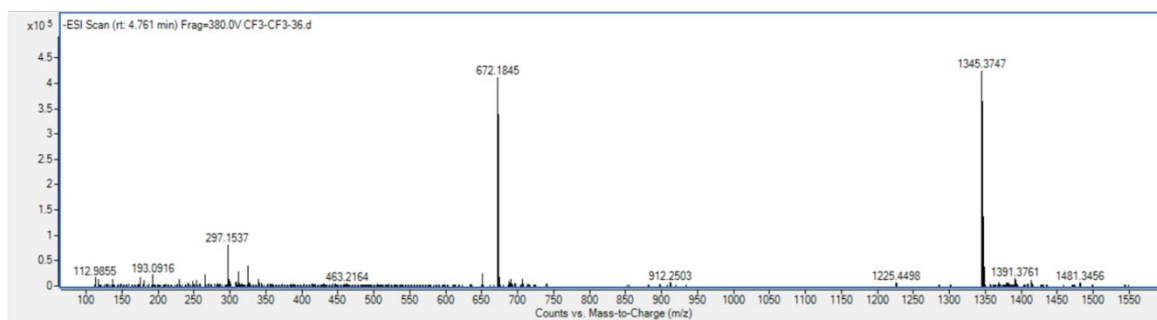



# $^{13}\text{C}$ -NMR of compound 28

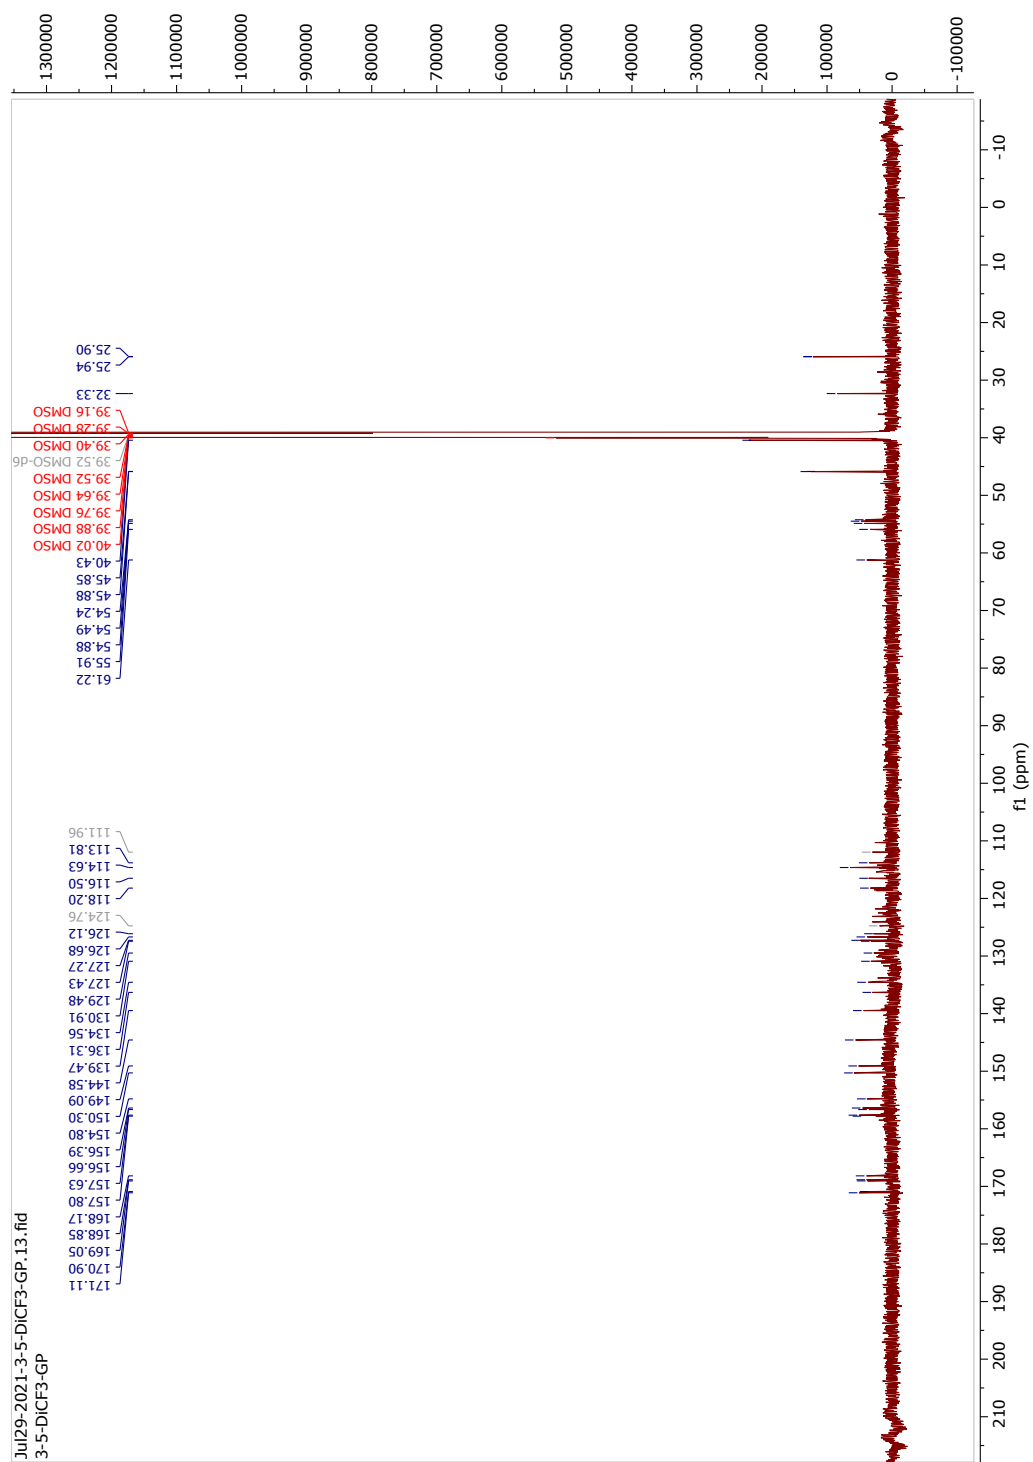

# Compound 29

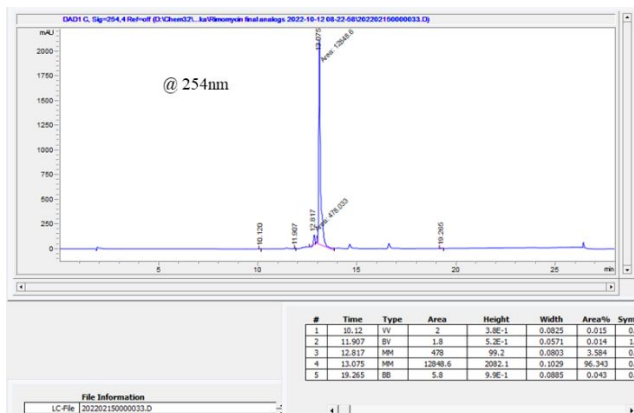

Compound 29

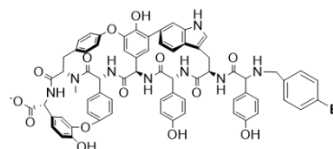

Chemical Formula:  $C_{68}H_{56}BrN_6O_{14}$   
Exact Mass: 1287.3105

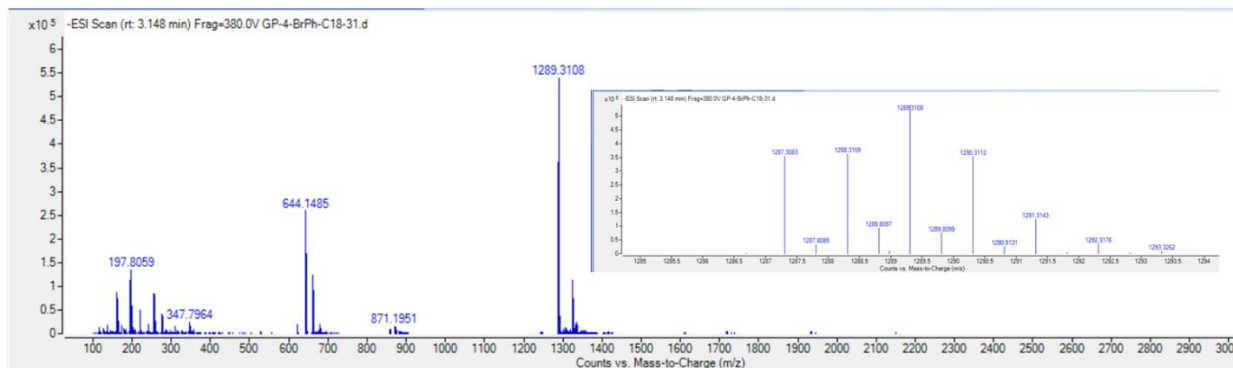

<sup>1</sup>H-NMR of compound 29

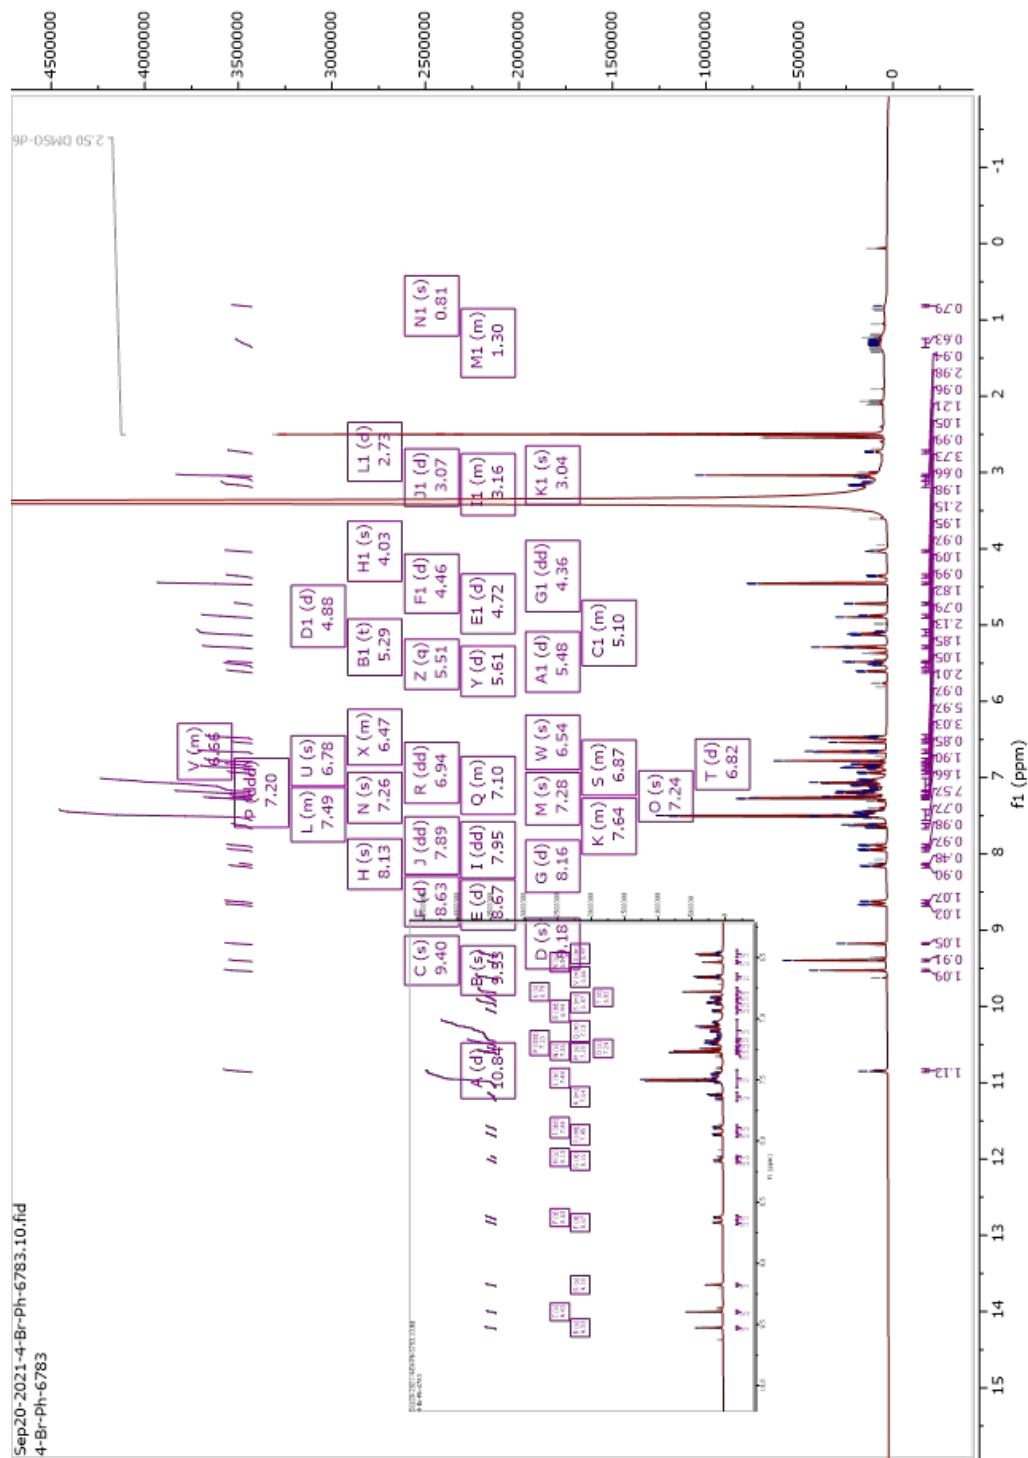

# <sup>13</sup>C-NMR of compound 29

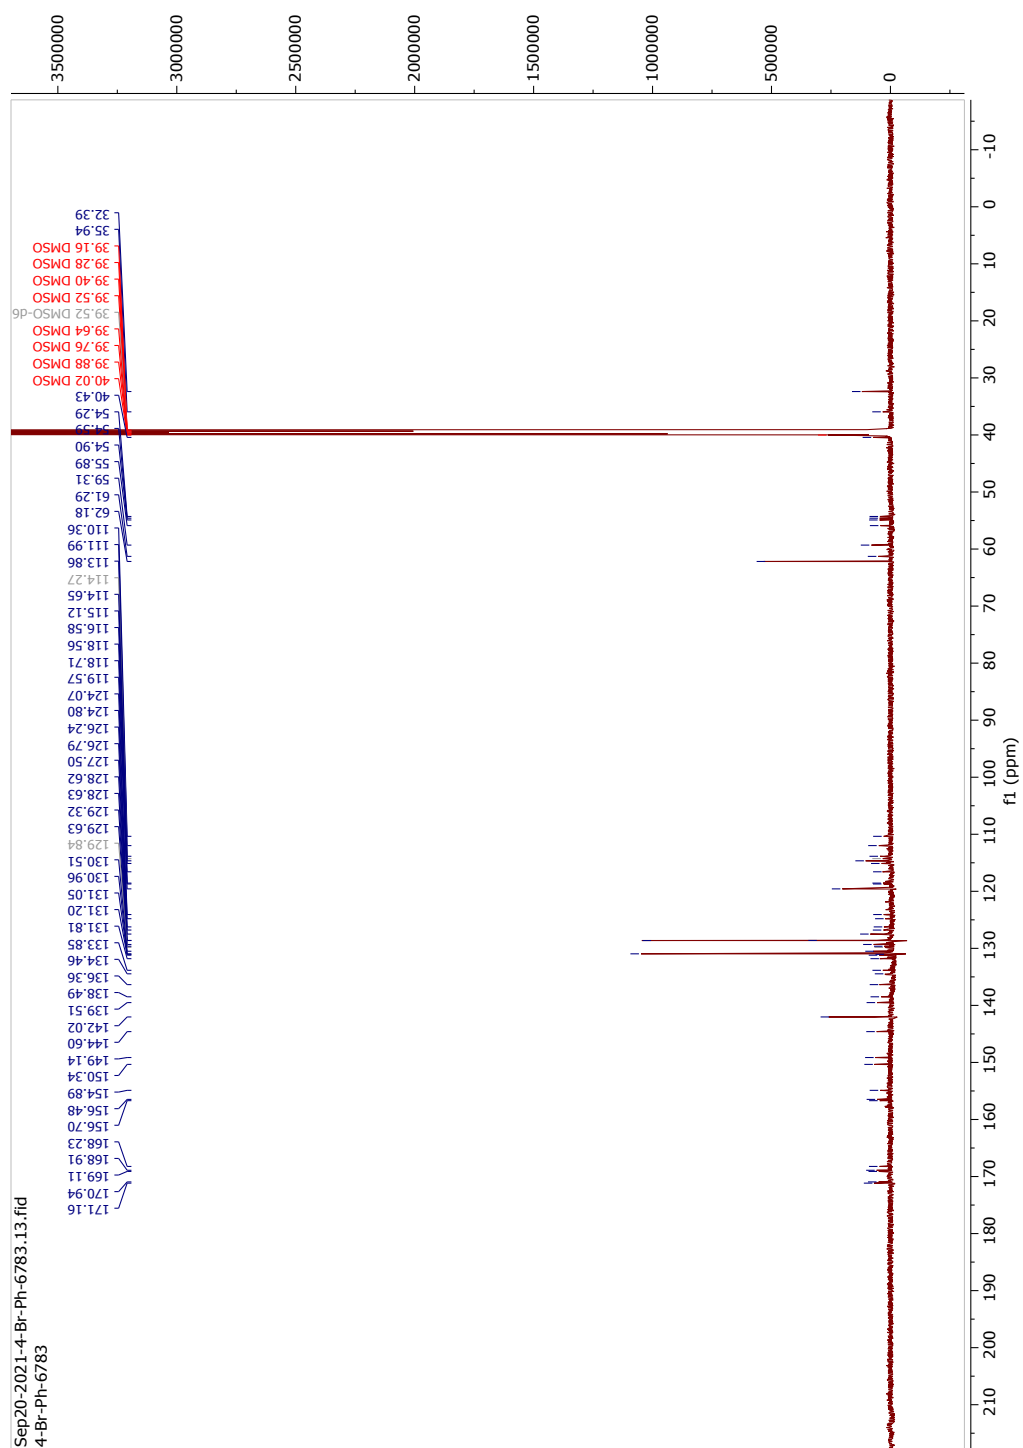

# Compound 30

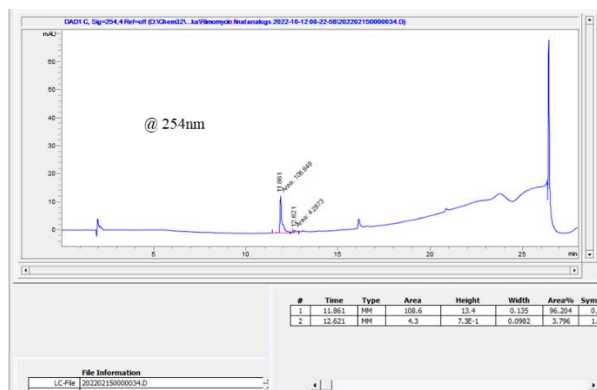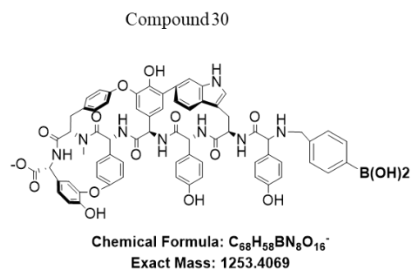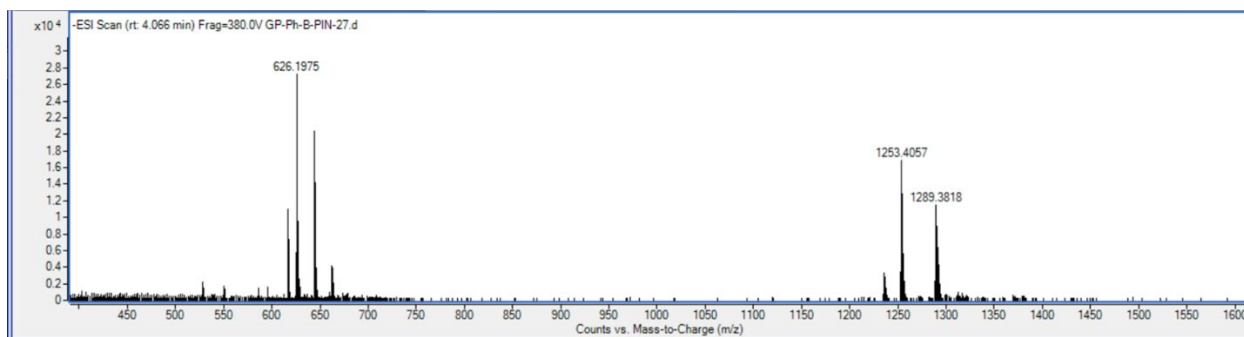

<sup>1</sup>H-NMR of compound 30

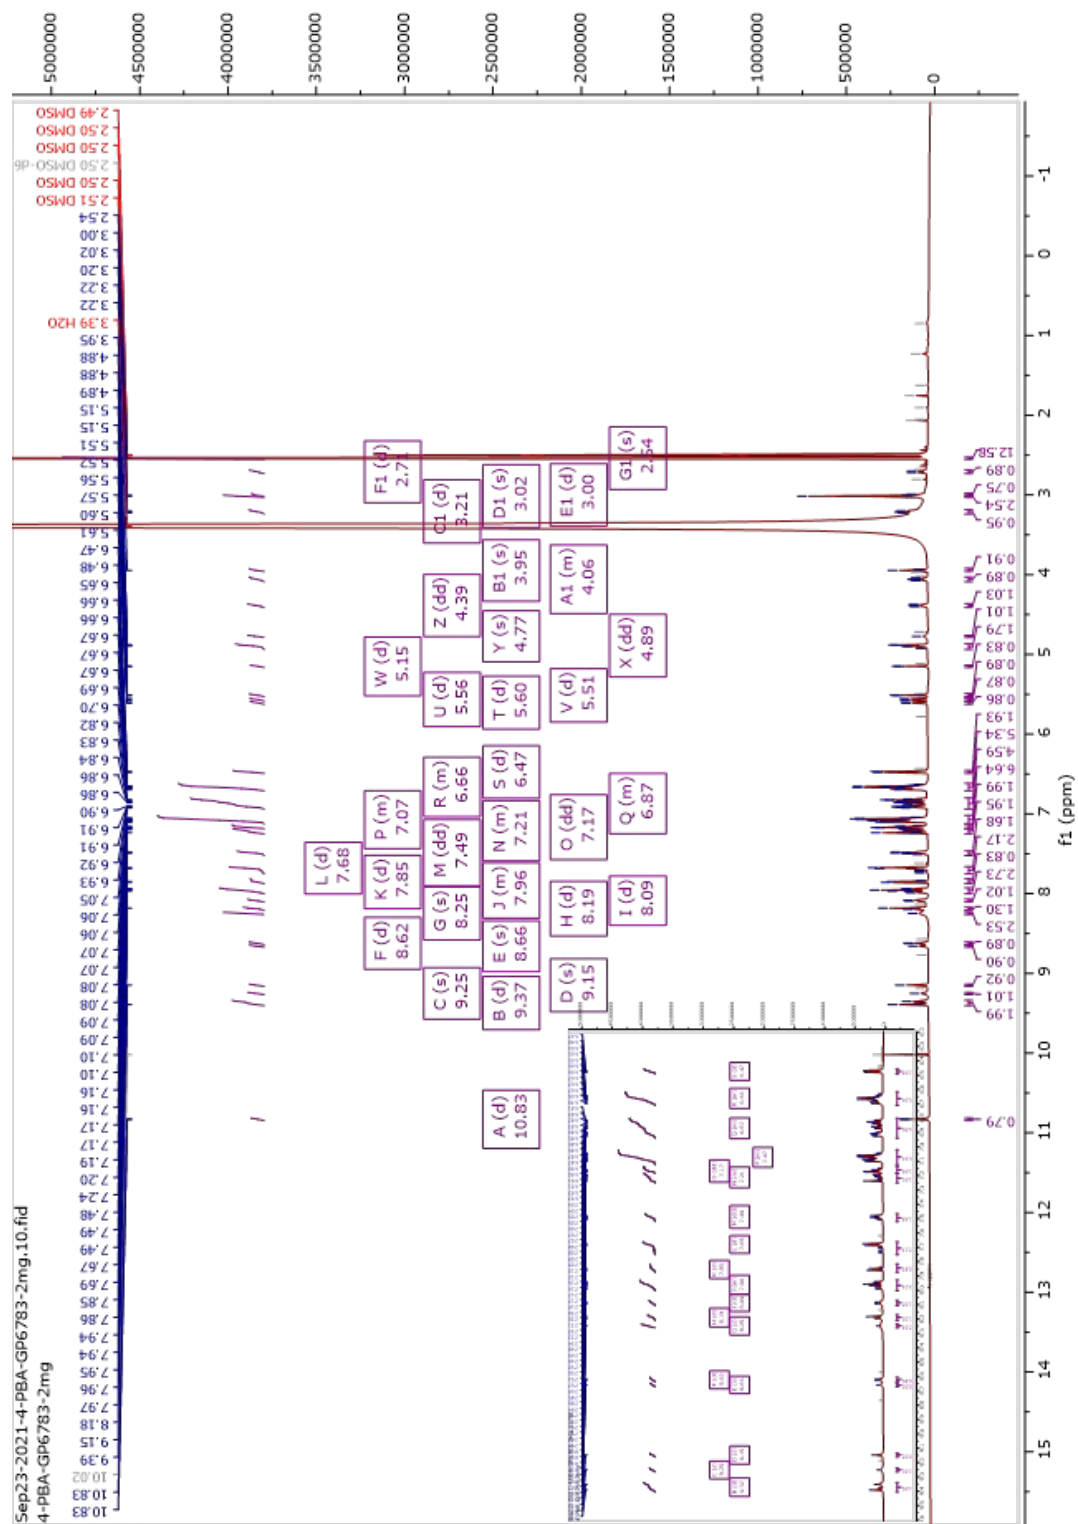



# $^{13}\text{C}$ -NMR of compound **30**

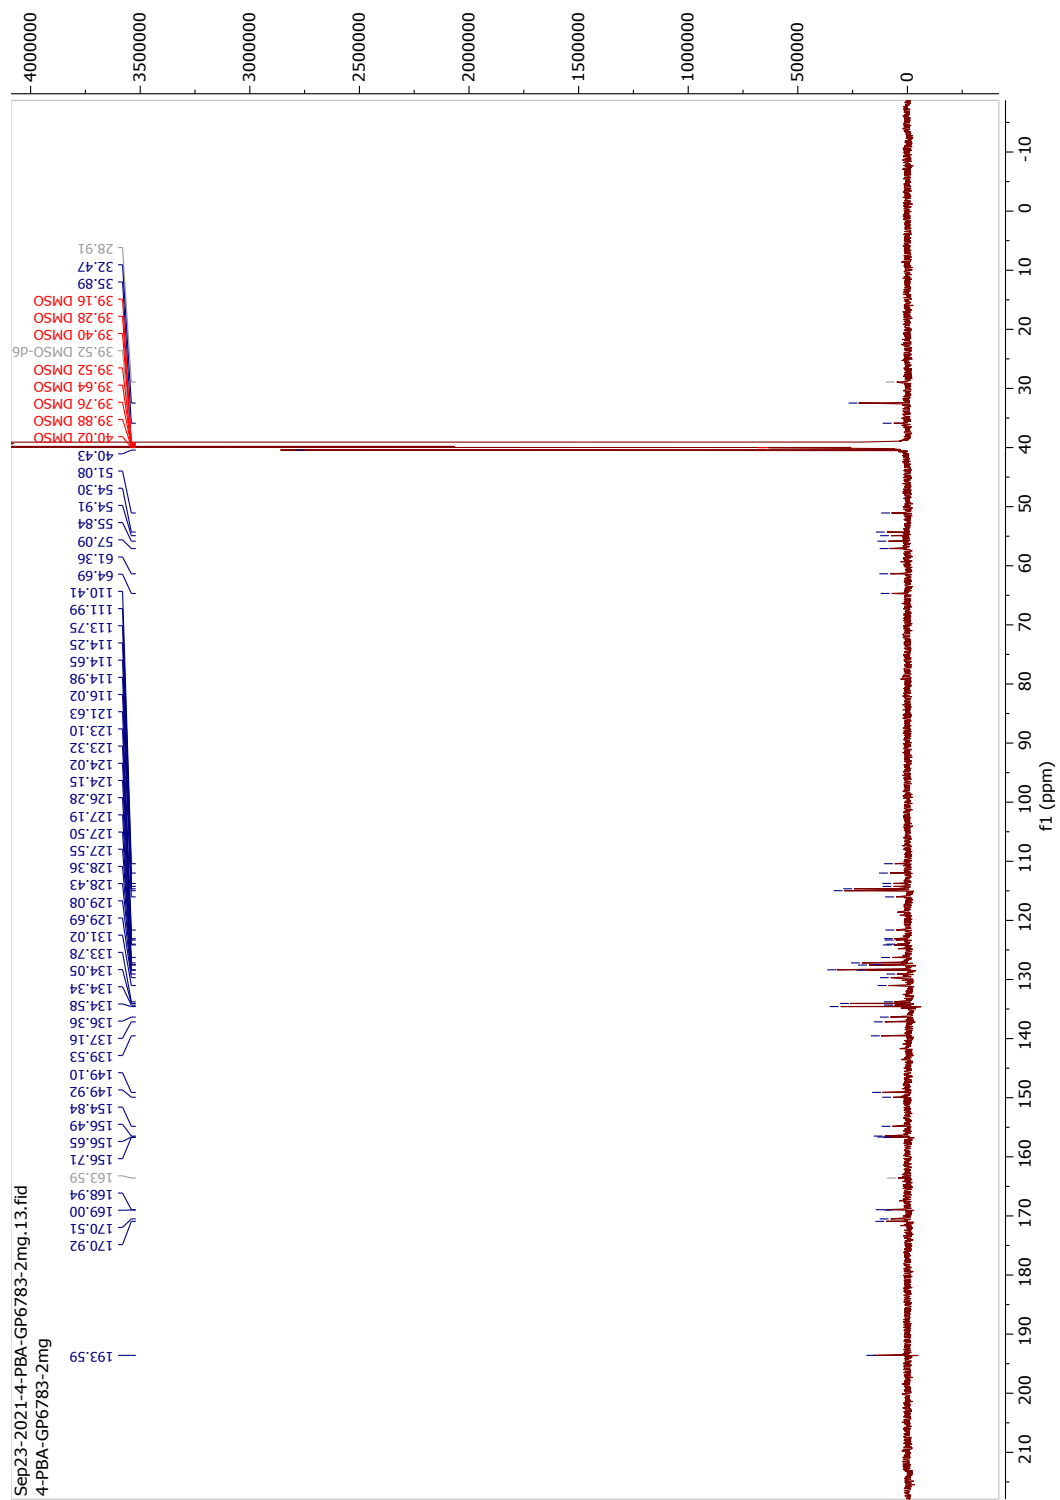

# Compound 31

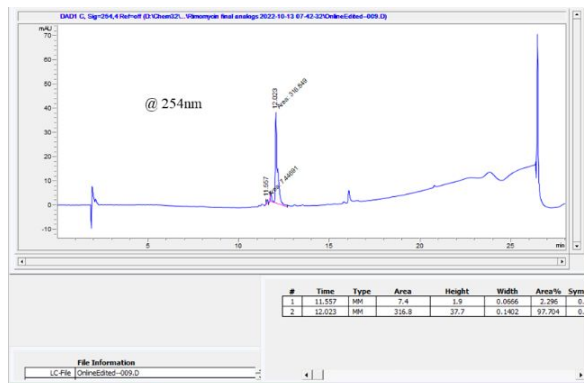

Compound 31

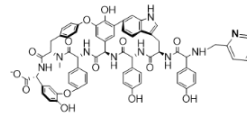

Chemical Formula:  $C_{27}H_{26}N_6O_{14}$   
Exact Mass: 1210.3952

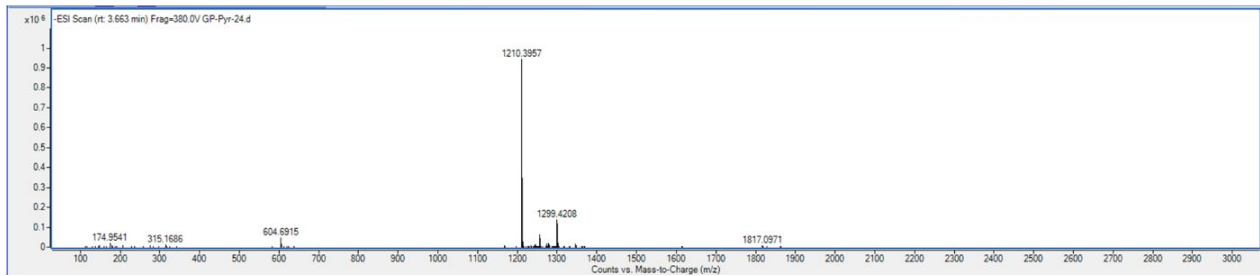

<sup>1</sup>H-NMR of compound 31

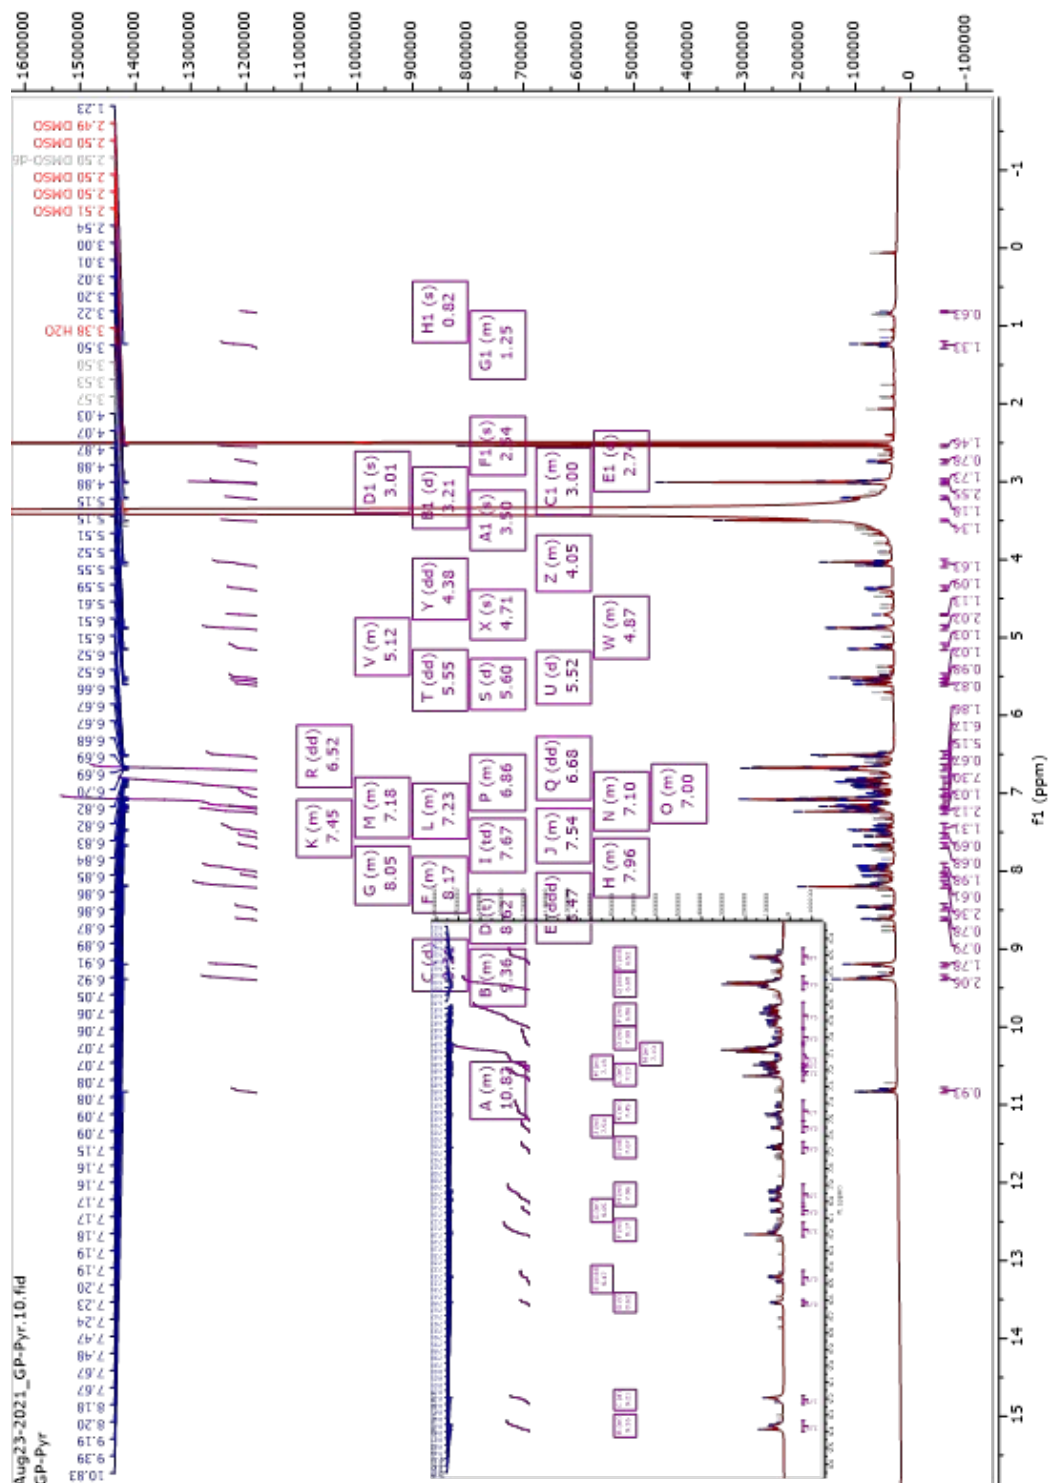

$^{13}\text{C}$ -NMR of compound **31**

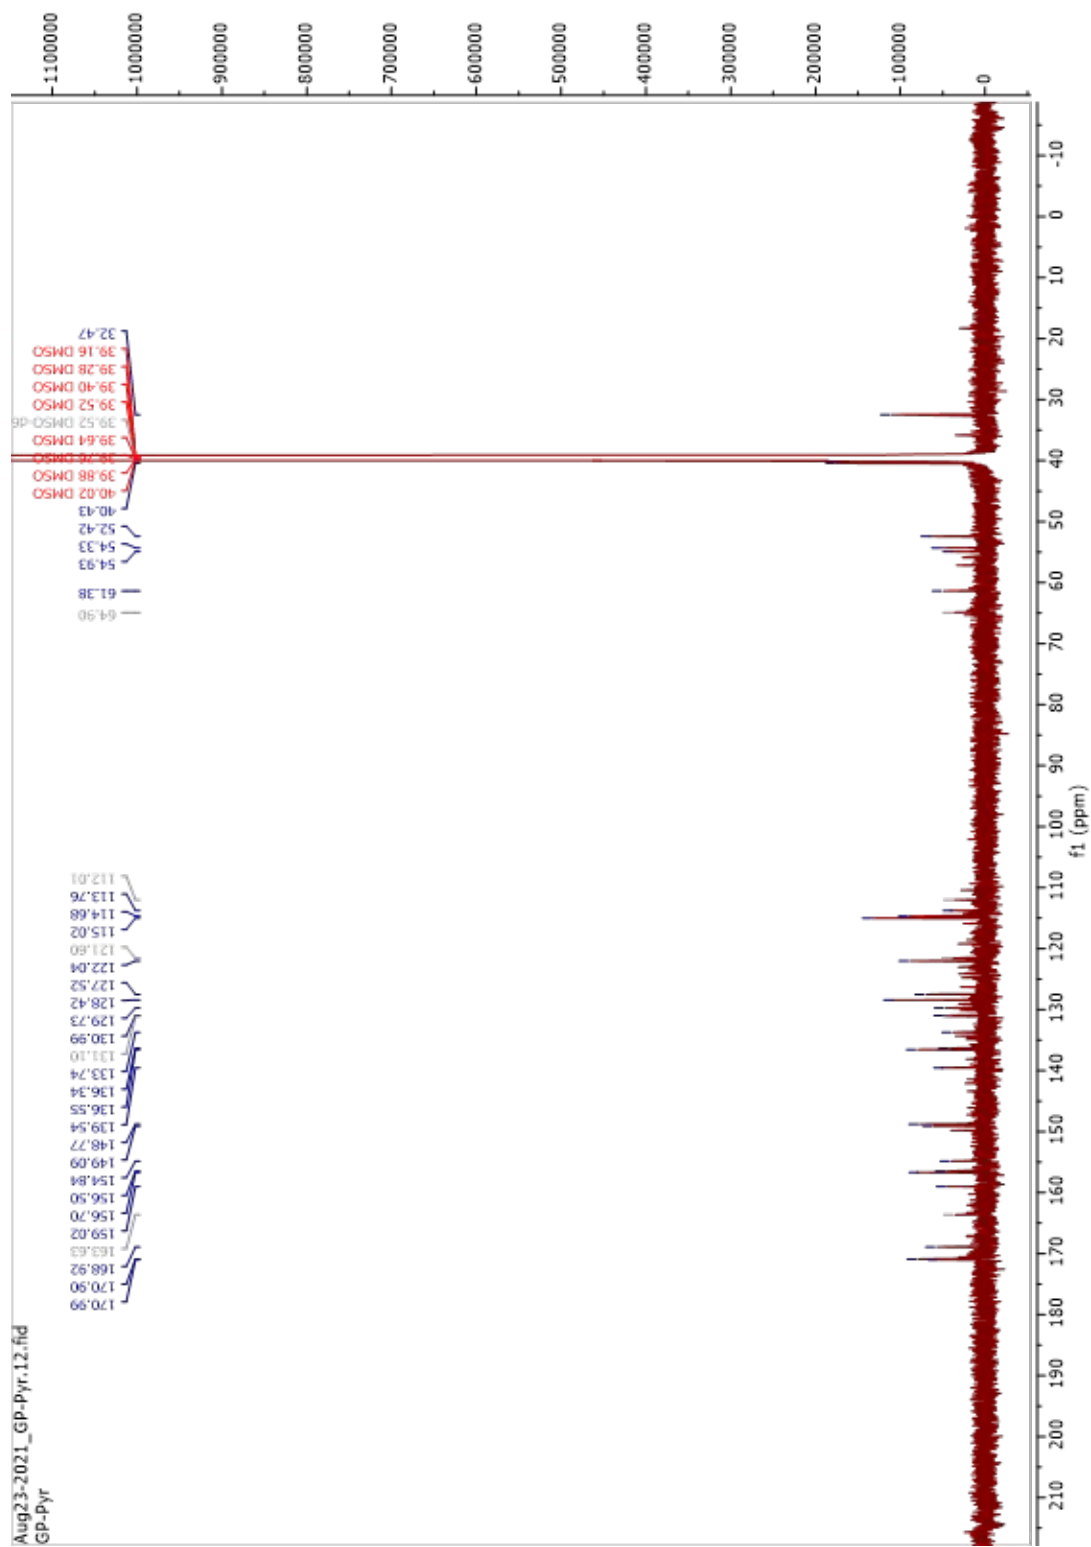

# Compound 32

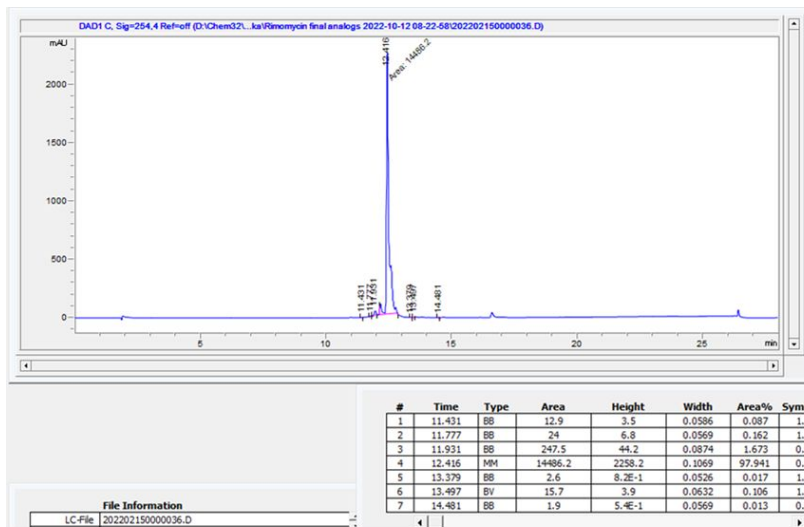

Compound 32

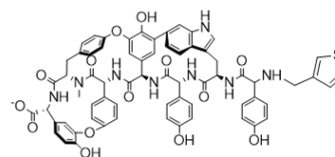

Chemical Formula:  $C_{66}H_{56}N_8O_{14}S$   
Exact Mass: 1215.3564

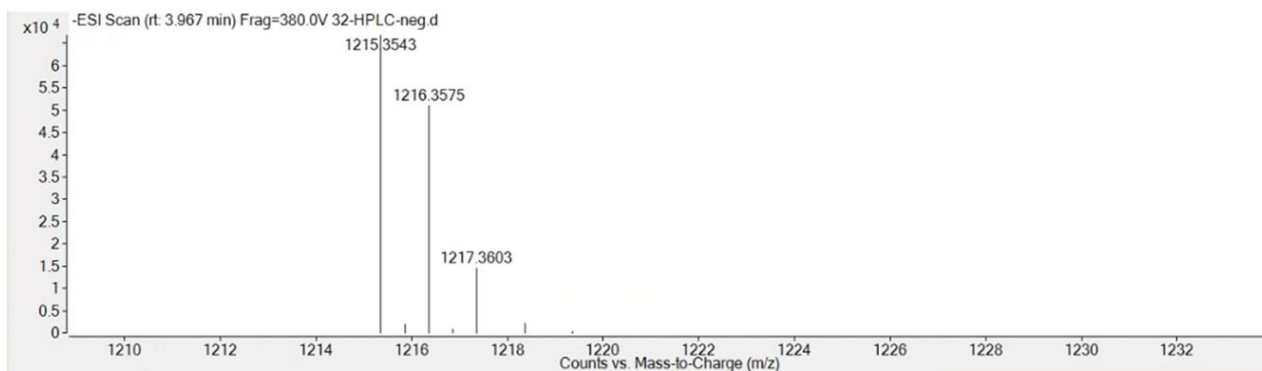

<sup>1</sup>H-NMR of compound 32

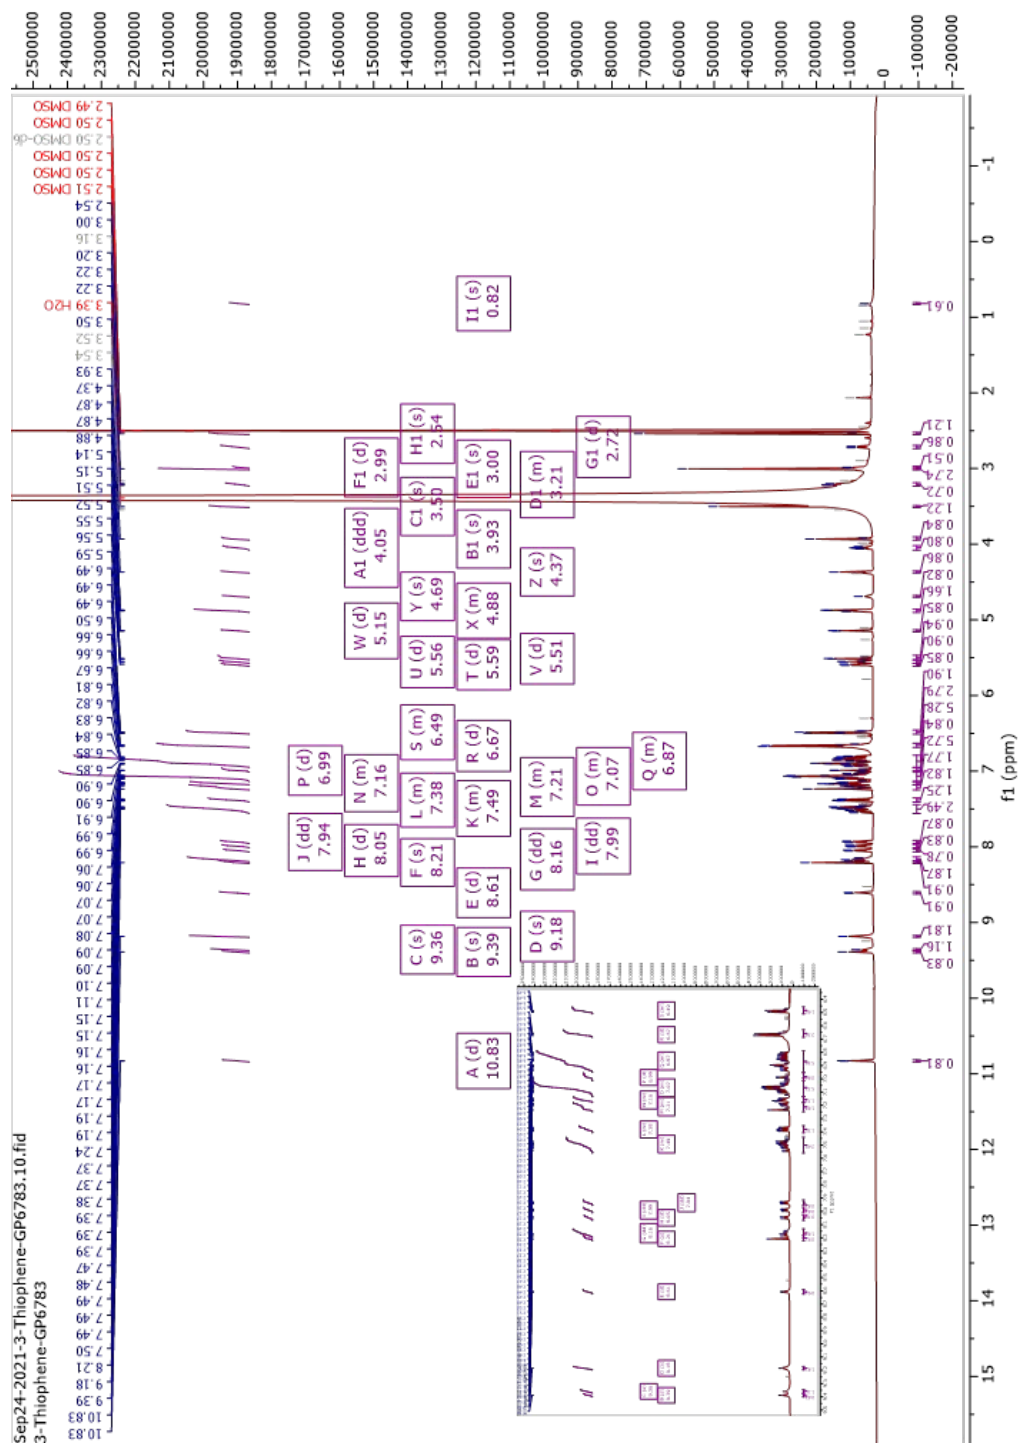

<sup>13</sup>C-NMR of compound 32

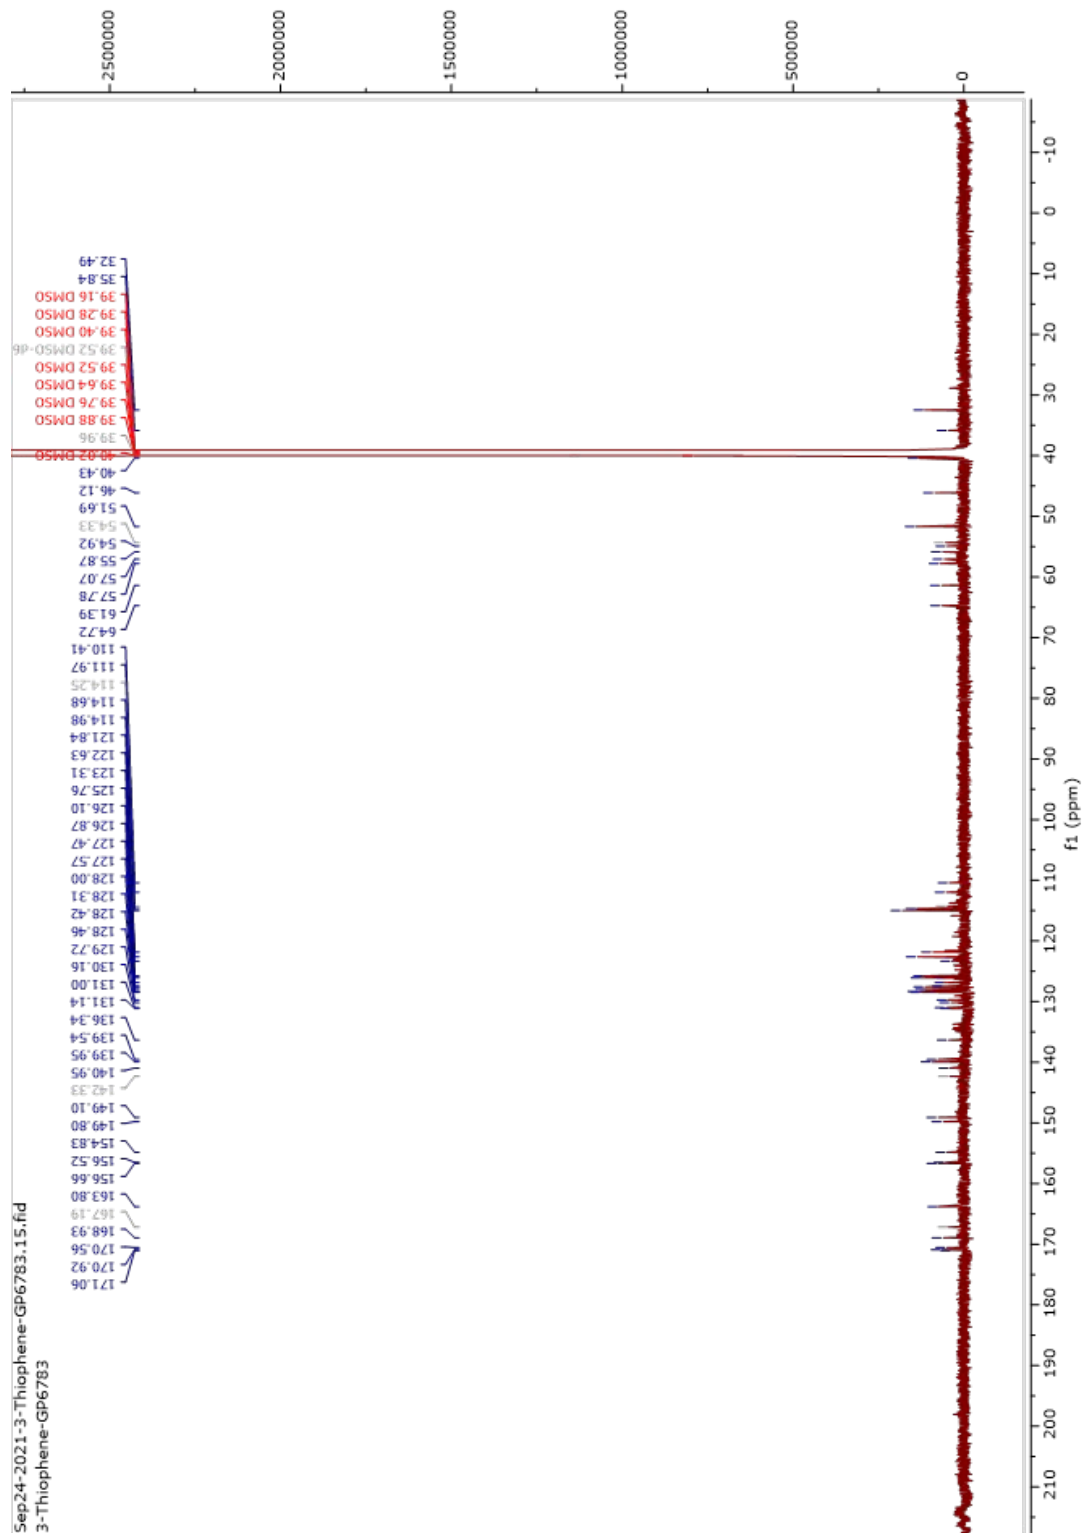

Supplement: jm3c00633_si_001.pdf [file jm3c00633_si_001.pdf]
